# Supplementary material for: Taphonomic and Diagenetic Pathways to Protein Preservation, Part I: The Case of Tyrannosaurus rex Specimen MOR 1125
Source: Biology (Basel). 2021 Nov 17;10(11):1193. doi: 10.3390/biology10111193 (PMC8614911; doi:10.3390/biology10111193)
Supplement: Supplementary file 1 [file biology-10-01193-s001.zip › Data S1 Brex REE.xlsx]

## Sheet: Sheet1
Data S1.
The following sheet contains all rare earth element (REE: La – Lu) and other trace element (Sc, Mn, Fe, Sr, Y, Ba, Th, U) concentrations recorded across the cortical transect of the right femur of Tyrannosaurus rex specimen MOR 1125. Concentrations are presented in parts per million (ppm) for all elements except iron (Fe), which is presented in weight percent. For visual representation of all tra…

## Sheet: Sheet2
mm from bone rim	Sc	Mn	Fe	Sr	Y	Ba	La	Ce	Pr	Nd	Sm	Eu	Gd	Tb	Dy	Ho	Er	Tm	Yb	Lu	Th	U	ƩREE	Ce/Ce*	Ce/Ce**	La/La*	Y/Ho
4.98016e-06	98.3155	1378.14	4074.58	1149.67	2660.92	707.761	721.266	1329.55	202.886	824.133	167.513	60.9284	262.486	49.1186	409.774	83.437	212.748	36.3667	158.886	25.5804	3.59634	25.3861	4544.68	0.81571	0.93647	1.37315	31.8914
0.03515	126.876	2727.52	6647.04	3200.67	6359.36	820.527	1221.28	2229.41	351.519	1343.25	387.339	126.3	536.02	79.5383	608.119	141.092	388.27	50.7745	414.362	62.4476	2.48489	51.9634	7939.73	0.798047	0.836273	1.10804	45.0726
0.0703	122.623	3451.15	6675	1971.13	4841.51	1182.36	1593.84	2434.45	316.698	1305.84	310.446	76.2296	483.712	96.3295	496.703	126.77	451.888	53.1113	369.563	39.154	2.96784	30.6919	8154.74	0.799203	1.1224	2.0542	38.1914
0.10545	131.885	2771.44	6284.36	2279.49	4641.95	1680.93	1111.78	2217.02	261.019	1086.4	244.242	68.7489	472.158	71.9579	532.445	115.479	272.13	29.2174	222.118	40.614	3.25794	29.3367	6745.34	0.966396	1.25756	1.80349	40.1974
0.1406	105.168	3934.13	7106.9	2901.84	5462.69	1072.5	1097.77	2011.91	247.199	1048	270.827	73.43	410.403	60.0221	480.981	85.3201	304.865	45.8628	265.126	41.4482	2.77796	27.1854	6443.17	0.905961	1.23958	2.03138	64.0258
0.17575	150.648	2116.64	6152.39	2097.95	4760.34	1238.69	881.013	1769.81	230.912	1187.36	218.534	62.299	348.496	69.4915	438.958	92.7358	250.583	30.239	160.897	31.9139	1.19128	19.6605	5773.25	0.921992	1.75438	27.7894	51.3323
0.2109	147.275	3649.62	8295.24	3779.4	5313.84	1400.34	1118.58	2582.1	277.595	1333.37	319.101	70.5182	415.441	67.837	507.101	118.826	341.498	42.8718	209.259	39.0375	0.647195	32.456	7443.14	1.08886	1.79105	4.44601	44.7196
0.24605	169.49	2946.62	9896.52	2496.77	4356.38	1314.6	793.778	1632.05	179.254	690.185	176.319	59.3745	290.24	49.591	421.094	83.0321	250.106	21.2946	203.142	26.99	1.31425	24.6991	4876.45	1.015	1.21181	1.44258	52.4663
0.28125	182.375	4013.51	9822.67	3806.12	5821.96	1427.05	1214.98	2535.33	301.342	1249.42	413.491	81.9928	603.667	84.2965	556.185	115.414	298.21	39.5272	216.201	36.8943	2.4276	48.1082	7746.95	0.984597	1.23855	1.68135	50.4439
0.3164	92.5737	1832.5	6623.98	2371.89	4424.12	746.383	721.436	951.322	150.477	734.159	174.937	40.1654	235.658	43.4019	313.213	73.3593	192.79	24.8898	179.059	23.4051	0.779657	21.6146	3858.27	0.675238	1.26205	6.52568	60.3075
0.35155	109.425	2367.63	3894.6	1405.61	2883.32	931.298	499.207	860.076	127.245	613.082	107.877	41.464	215.396	36.3929	238.603	71.2552	257.804	29.9747	220.264	28.3677	0.775717	14.7553	3347.01	0.801943	1.31061	4.49581	40.4647
0.3867	95.4773	2785.3	3912	2245.98	3575.7	796.775	552.208	983.083	113.301	654.1	176.157	44.9406	159.826	34.3974	203.997	53.503	157.562	24.2301	172.337	35.073	0.516778	18.9023	3364.71	0.918374	3.06325	nd	66.8317
0.42185	133.608	2310.61	5135.12	3642.01	6024.79	1258.13	783.678	1133.47	126.342	847.109	204.238	60.2936	322.439	49.3038	427.676	96.8166	293.911	42.9912	245.43	43.3487	1.61044	37.6427	4677.05	0.825108	15.8991	nd	62.2289
0.457	77.1598	1915.18	4577.37	2161.32	2639.93	1098.62	587.351	900.065	148.546	566.935	174.967	45.2714	176.34	44.2896	265.878	82.4477	267.796	29.4893	192.921	32.8213	1.27713	21.6653	3515.12	0.71608	0.797744	1.25674	32.0194
0.49215	122.477	1532.76	4377.21	2353.47	3426.86	692.269	615.588	962.723	137.336	613.367	147.083	48.4931	274.491	58.1863	357.617	74.117	269.66	34.4279	199.771	37.1148	0.921269	20.8418	3829.98	0.776459	1.16561	2.68155	46.2359
0.5273	98.2667	1665.35	4314.4	1855.89	3234.61	567.097	400.622	615.534	86.4878	449.243	101.955	30.9176	199.626	33.1423	270.4	59.9273	231.821	26.4541	153.294	25.8339	0.973225	12.0634	2685.26	0.774534	1.67791	247.521	53.9755
0.5625	123.922	2670.99	7529	2529.61	4286.98	991.951	727.529	1536.22	167.104	719.724	199.013	47.614	287.459	45.0904	378.164	119.089	305.271	40.8235	276.118	34.8282	1.11615	42.3075	4884.04	1.03407	1.43612	2.14173	35.9982
0.59765	92.7444	2828.98	5024.78	2168.89	3183.15	1302.97	487.159	1183.67	139.399	680.575	161.103	59.5959	285.397	44.9405	362.44	72.7808	263.86	35.978	203.325	33.6661	0.553401	32.8528	4013.89	1.06552	1.69781	4.80604	43.7361
0.6328	107.426	2437.63	5603.16	2779.78	5295.86	1069.4	757.364	1358.18	205.265	858.738	212.501	57.4753	329.084	64.624	577.785	108.106	434.495	47.2528	256.081	39.8814	1.47309	28.4179	5306.83	0.809072	0.987274	1.5951	48.9875
0.66795	156.586	6017.49	5567.95	3721.75	5756.86	1413.16	966.098	1947.63	441.216	1264.86	280.893	91.469	403.309	86.0604	685.862	136.371	409.466	49.9393	332.006	50.7627	2.11242	33.9752	7145.94	0.671923	0.445544	0.412951	42.2146
0.7031	106.773	1845.35	4573.53	1382.31	2662.82	856.529	523.222	861.38	130.888	568.735	125.183	31.6272	205.92	40.3261	340.815	66.0572	187.982	30.6484	215.299	36.6525	0.859554	22.2451	3364.74	0.773495	1.0432	2.05401	40.3108
0.73825	117.595	2494.71	7062.68	1908.7	4096.73	2144.46	1035.91	1263.98	157.017	647.411	201.493	56.2798	345.451	46.5888	517.837	139.643	406.609	45.2948	256.345	46.0322	0.141789	24.1628	5165.89	0.712622	1.17535	2.69258	29.3372
0.7734	130.6	3316.18	5834.44	1871.56	3595.61	1270.72	582.651	842.962	112.306	543.273	146.858	27.9378	249.591	42.858	298.392	70.9976	196.356	31.2953	166.422	23.5657	0.412651	19.4203	3335.47	0.767094	1.46881	6.26011	50.6441
0.8086	63.4371	2004.27	4094.59	1567.03	2601.58	688.792	477.829	694.558	99.5298	449.947	119.931	21.8813	131.777	24.9328	191.1	44.0205	131.301	15.6221	74.596	16.521	0.634769	18.7029	2493.55	0.744782	1.18655	3.10183	59.0994
0.84375	122.632	5175.64	10684.7	2975.08	4833.14	1691.3	979.605	1321.39	168.493	674.963	155.884	39.1826	319.415	55.3779	314.942	104.866	339.28	57.7515	398.971	50.3509	1.32448	26.5909	4980.47	0.750036	1.09922	2.14025	46.0887
0.8789	90.2441	2251.36	4923.18	2185.68	3660.12	1177.73	554.105	1311.61	115.23	635.934	164.743	42.7798	278.533	48.2574	320.384	85.6391	202.417	26.7046	168.168	26.5456	0.869924	41.8766	3981.05	1.21373	3.29782	nd	42.7389
0.91405	69.8699	1988.4	8354.32	1786.03	2659.43	965.867	519.099	1428.13	111.712	456.347	114.236	27.679	131.161	45.3359	280.052	62.2108	195.11	27.9408	155.22	23.7414	0.718036	15.1201	3577.97	1.3889	1.84159	1.83175	42.7487
0.9492	114.609	2307.34	6419.83	2207.88	3730.18	1248.53	785.932	1224.02	143.355	649.08	156.012	54.3555	275.059	48.0415	384.823	98.7427	245.475	27.1624	172.383	23.0896	0.398289	24.3238	4287.53	0.845338	1.45606	3.57925	37.7768
0.98435	84.1988	1783.57	5892.22	2577.27	3453.9	1791.62	545.583	1633.12	95.9032	610.95	153.837	43.406	175.888	35.97	367.332	81.0705	164.028	21.8216	158.536	30.1567	0.255178	24.0933	4117.6	1.64976	12.3544	nd	42.6037
1.0195	101.742	1605.94	3690.92	2350.79	3329.12	779.328	449.153	892.883	109.118	407.742	108.243	29.7615	206.691	27.5241	281.043	76.1058	202.829	33.308	174.061	32.5515	0.300732	15.4683	3031.01	0.947564	1.05043	1.237	43.7433
1.05465	91.0393	2836.97	6795.04	3248.25	5920.13	1279.18	581.147	901.53	137.292	601.841	193.341	51.1363	372.26	55.8691	592.341	107.343	414.802	50.4803	285.671	34.8252	0.289896	20.3712	4379.88	0.749543	1.05657	2.27707	55.1514
1.08985	116.497	5076.8	5810.06	3705.65	5811.08	1506.45	726.799	1087.09	151.762	744.235	137.613	38.5435	261.019	57.3164	376.744	101.206	322.242	32.4948	245.61	43.3806	0.500019	26.1309	4326.05	0.76553	1.44757	7.06552	57.4184
1.125	90.1634	1699.16	4053.13	2486.42	3331.08	907.627	371.873	589.992	89.3487	341.217	110.146	19.6953	139.818	30.6822	281.03	49.2856	175.989	27.0975	186.868	28.7491	0.300153	11.3066	2441.79	0.760335	0.87004	1.32513	67.5873
1.16015	110.888	2599.65	4843.62	2734.72	5060.38	1963.3	719.295	1691.04	145.788	712.213	187.931	47.2273	404.384	61.378	488.733	127.645	365.36	45.0362	294.374	37.8072	0.440142	21.0633	5328.21	1.2194	2.32272	6.85047	39.6441
1.1953	109.964	2277.17	5231.96	3235.04	4401.11	825.032	420.039	555.326	95.9866	334.761	116.447	31.5975	188.33	32.0777	258.192	94.6661	306.717	32.6361	179.956	30.0656	0.220476	15.9523	2676.8	0.649021	0.689053	1.12405	46.4909
1.23045	139.759	2001.77	4260.44	2478.91	4730.12	843.612	489.167	756.156	159.509	684.836	144.083	37.2732	232.281	49.5176	481.509	109.248	269.721	50.3439	269.263	40.3214	0.420974	27.5644	3773.23	0.63122	0.736721	1.48595	43.2971
1.2656	124.769	1465.68	3121.69	1386.49	2851.56	674.505	372.219	501.375	69.4833	403.888	116.042	30.6689	136.579	23.975	223.872	59.7633	159.572	25.6352	179.754	21.9248	bd	12.6605	2324.75	0.724036	2.63724	nd	47.7143
1.30075	114.659	4015.72	15001.3	2872.84	4969.82	1391.85	568.491	806.355	93.9054	758.943	146.454	54.2021	285.853	45.5022	478.512	121.843	317.581	45.5031	304.234	42.4304	bd	20.8959	4069.81	0.801511	nd	nd	40.7889
1.3359	124.626	3278.13	11577	2780.23	4494.77	1279.86	605.653	865.473	112.52	475.564	182.304	26.232	298.698	56.8976	341.329	102.717	329.032	45.0812	336.081	44.9304	bd	22.1951	3822.51	0.769668	1.16585	2.42929	43.7589
1.3711	111.298	2969.14	6373.82	2110.16	2763.86	1132.42	358.356	749.634	74.3363	352.997	101.599	26.083	187.502	36.4113	334.994	71.7514	202.461	28.1282	216.169	30.1122	0.417343	17.5591	2770.53	1.07383	1.89327	4.67872	38.5199
1.40625	89.8655	2581.59	5868.57	1908.31	3131.28	924.332	462.474	654.099	78.4878	367.187	121.838	36.424	220.934	47.858	386.954	86.779	278.404	37.0024	237.027	37.3567	0.1411	18.5101	3052.82	0.790671	1.51586	4.9511	36.0834
1.4414	75.502	1334.9	3489.93	1263.71	1891.95	697.243	291.301	443.124	62.8398	242.372	64.2097	32.7195	194.961	30.0067	260.91	54.8782	146.804	18.8408	134.905	24.2062	0.0947627	13.7242	2002.08	0.767108	0.940597	1.51764	34.4754
1.47655	124.232	2551.07	9223.76	2817.66	4387.63	1621.85	578.724	657.11	91.6102	366.864	89.9911	49.4228	278.115	55.8594	405.013	97.5645	309.649	30.493	218.331	36.151	0.164691	25.9593	3264.9	0.65233	1.00495	2.32308	44.9715
1.5117	92.0749	2274.25	7645.62	2862.71	3507.72	1095.4	551.987	793.232	126.318	443.643	125.169	31.7411	157.732	43.3763	341.876	97.1302	317.824	41.2419	223.4	35.354	0.14682	23.7679	3330.02	0.704986	0.753274	1.13876	36.1136
1.54685	84.8694	2529.15	6665.89	2536.19	3337.3	1520.11	464.717	722.588	119.579	430.2	134.327	29.7382	201.743	39.854	275.767	68.0034	251.824	28.9525	205.384	30.4825	0.128006	17.1202	3003.16	0.720324	0.743414	1.06669	49.0755
1.582	71.4699	1872.98	5534.54	2001.39	2598.52	961.406	302.639	508.568	60.76	330.377	76.8709	27.7377	165.667	22.3321	237.479	54.7104	174.254	23.17	149.683	21.6838	bd	10.2673	2155.93	0.875281	2.29333	nd	47.4959
1.6172	58.4501	1806.63	9912.23	1528.44	2446.89	875.483	309.202	569.793	68.4893	274.544	78.8941	25.2587	122.762	17.5066	164.235	47.7928	161.043	18.5708	100.308	16.3637	bd	12.0369	1974.76	0.917984	1.16715	1.66567	51.1978
1.65235	103.756	2077.09	4899.93	2208.99	2928.42	960.739	337.019	561.658	81.7132	452.181	109.667	33.2757	261.018	28.243	215.26	67.5487	194.04	30.6539	161.639	25.0254	0.577843	23.2734	2558.94	0.79515	2.01262	nd	43.3528
1.6875	87.1833	2695.2	6121.01	3467.95	4265.27	1107.69	394.583	570.562	75.1948	383.308	129.68	30.013	155.878	33.0407	234.662	53.5209	211.986	22.7816	135.048	28.8747	0.276216	16.7661	2459.13	0.77044	1.69479	22.0145	79.6937
1.72265	79.2959	2098.44	4383.6	2651.22	3601.25	1031.99	363.378	556.475	87.195	445.677	152.523	36.5805	185.919	38.1243	309.957	70.0657	247.951	27.814	155.453	31.3237	0.450237	18.6961	2708.44	0.734366	1.43619	20.116	51.3982
1.7578	74.5702	2692.94	5623.92	2466.18	3307.84	1624.35	440.378	530.452	90.1158	411.867	127.028	43.3792	179.117	25.2249	274.984	68.6192	214.494	19.8329	193.018	29.2466	0.286895	20.1602	2647.76	0.622111	1.02188	3.40558	48.2056
1.79295	95.1405	1531.27	5097.72	1370.18	1983.34	1153.35	284.858	371.685	53.6932	261.454	57.9101	21.5291	133.543	21.4458	185.734	50.1675	137.759	17.0686	118.979	19.0564	bd	11.5328	1734.88	0.69848	1.37555	7.01567	39.5344
1.8281	100.871	1627.99	4169.88	1835.14	2717.48	1152.62	404.116	585.312	114.17	405.955	118.322	34.0767	218.862	31.3017	276.479	62.4068	193.005	25.5901	150.138	28.0973	bd	17.0919	2647.83	0.63946	0.6229	0.946832	43.5446
1.86325	98.8013	2890.09	4131.95	2989.53	3007.81	1054.49	397.604	432.062	66.2659	383.357	72.9072	22.6781	173.121	26.9851	243.019	51.4105	183.166	14.3549	79.8495	18.8568	bd	12.9866	2165.64	0.611889	2.32589	nd	58.5056
1.89845	91.5567	2820.24	7458.21	2862.26	3515.08	795.997	267.804	393.936	72.1412	441.714	128.267	26.5041	201.508	27.2915	284.453	69.2715	185.349	34.0322	161.069	24.1108	bd	18.1063	2317.45	0.665743	2.75648	nd	50.7436
1.9336	84.0367	2298.72	8308.07	3831.59	4813.38	1104.47	359.186	682.554	87.397	383.784	123.852	22.3658	223.753	47.8662	337.274	77.3777	256.059	30.6496	218.91	19.8599	0.133308	24.6511	2870.89	0.905099	1.26038	2.23162	62.2063
1.96875	91.9532	2287.86	4910.66	2383.46	2567.5	854.267	202.698	342.069	101.556	275.902	115.442	19.0411	171.662	24.5512	254.062	44.9566	178.435	29.8561	229.333	26.31	bd	20.2051	2015.87	0.52945	0.327886	0.353703	57.1105
2.0039	81.2209	1964.51	4915.1	2570.78	2782.33	1292.73	332.597	371.931	59.0336	281.921	72.6611	29.7943	186.466	32.7815	278.619	86.0281	257.205	27.232	218.867	21.4535	bd	20.5601	2256.59	0.613878	1.19759	5.8132	32.3421
2.03905	83.4196	2517.73	4996.25	1959.79	3202.58	764.163	342.552	424.668	65.4427	237.791	73.8664	34.0051	127.759	31.2618	279.206	83.0939	283.233	32.4619	204.512	33.5288	0.234692	24.4063	2253.38	0.65983	0.807027	1.46966	38.5417
2.0742	104.284	2684.35	7425.41	2666.22	4613.42	928.054	416.127	751.972	101.782	376.521	148.276	43.7728	185.073	41.9324	418.275	92.7256	281.257	46.895	245.875	44.7451	0.289498	37.5788	3195.23	0.858506	0.937468	1.19808	49.7535
2.10935	133.255	2196.41	4677.15	2126.3	3309.65	779.07	324.402	442.949	70.0348	373.24	109.831	27.6944	220.693	41.0489	292.727	63.8124	193.744	23.1515	178.975	31.6112	bd	38.9116	2393.91	0.688316	1.6164	nd	51.8653
2.1445	99.1107	2555.31	4338.88	1867.16	2965.56	596.355	328.147	472.496	65.441	317.717	68.2495	26.9696	173.055	28.7646	243.055	66.2377	228.607	30.3304	160.655	32.5953	0.39835	20.7141	2242.32	0.752206	1.42481	6.35639	44.7715
2.1797	143.843	1882.36	6788.26	2025.59	3302.18	799.508	377.454	435.709	74.294	380.35	99.1146	36.7636	245.145	37.8916	308.066	71.6556	262.475	30.6326	274.16	38.8278	bd	17.9282	2672.54	0.606503	1.32577	26.9619	46.084
2.21485	122.674	2438.69	5033.77	2363.3	4514.61	1100.12	522.943	783.652	79.8692	311.722	99.1221	36.3723	176.341	42.571	255.842	82.2668	301.534	41.7111	201.049	36.5439	bd	20.3114	2971.54	0.872716	1.32856	2.21931	54.8776
2.25	80.6773	1840.83	4359.56	1940.82	2815.09	1308.39	324.99	453.039	46.5386	266.466	84.6046	18.8179	177.973	24.3002	248.058	64.0844	203.053	33.2127	204.49	35.694	bd	23.0438	2185.32	0.831316	3.30215	nd	43.9279
2.28515	132.999	3642.84	7118.14	2581.24	3973.24	1194.01	400.694	496	77.9148	278.919	76.4122	22.5578	220.878	54.9778	354.745	83.5733	304.308	35.8891	210.655	42.263	0.470822	36.792	2659.79	0.653835	0.779017	1.39607	47.542
2.3203	86.4588	1922.64	4572.89	1880.17	3018.09	972.407	316.825	525.445	44.6184	257.159	85.915	13.3485	139.718	24.526	193.549	44.773	169.243	24.5519	160.503	28.8984	bd	16.3918	2029.07	0.994965	4.12351	nd	67.4087
2.35545	113.037	3273.92	6339.36	3656.86	5151.72	1240.52	341.206	549.52	72.1388	343.057	99.3472	26.7365	164.123	37.5402	285.04	74.9168	263.727	25.7445	215.468	37.1663	0.133662	21.6378	2535.73	0.819657	1.43465	4.66109	68.7659
2.3906	89.3572	1858.64	4449.66	2048.75	2526.24	765.707	268.341	285.525	48.2928	273.483	76.2826	17.5136	77.0678	25.9782	224.802	55.0269	169.065	26.1605	155.223	27.4161	0.226992	14.6285	1730.18	0.58078	1.9069	nd	45.9092
2.4258	72.6935	2556.3	4927.94	1555.76	2446.96	615.836	222.57	294.929	40.1468	200.967	57.3086	14.6831	100.21	23.8527	204.513	46.376	169.347	23.4838	122.954	21.3211	0.0989326	31.2078	1542.66	0.722595	1.56289	12.4132	52.7634
2.46095	91.5912	2021.59	4702.47	2063.21	2521.98	1121.41	257.022	330.27	56.2743	252.021	85.7338	26.4582	109.429	24.5597	237.274	66.7714	154.45	23.7773	174.571	25.2963	0.617459	12.2467	1823.91	0.643575	0.980741	2.7786	37.7703
2.4961	78.8665	3048.44	5588.56	2142.66	2864.19	752.206	280.016	366.597	44.8834	207.833	75.2278	23.3356	126.526	28.2815	238.618	55.4615	189.531	24.3561	190.699	26.6942	0.727239	18.0896	1878.06	0.748538	1.45489	4.80445	51.6428
2.53125	82.08	2453.21	3445.07	2291.31	3475.67	869.854	255.334	321.138	57.7608	254.556	68.9784	12.1464	137.097	25.523	221.667	67.8052	245.485	29.451	184.336	26.6631	bd	12.8261	1907.94	0.620383	0.902874	2.44806	51.2597
2.5664	99.1452	1662.07	3668.84	2721.8	3774.27	916.435	264.705	337.427	63.3942	294.975	69.0635	23.4919	184.158	34.3949	316.14	81.7471	244.727	40.4678	267.004	40.576	0.281458	23.1758	2262.27	0.611863	0.957457	3.34734	46.1701
2.60155	109.401	2377.57	5589.77	2157.37	3627.52	1296.94	309.392	366.013	65.2116	363.867	116.817	29.3354	186.072	39.0941	288.071	89.8318	312.885	47.981	236.701	37.563	bd	16.982	2488.83	0.60292	1.69919	nd	40.3813
2.6367	85.4053	2579.21	4520.09	2330.83	2981.93	1011.93	258.59	279.417	45.0732	271.656	88.0487	19.9925	88.7419	24.1334	201.561	59.0863	177.613	26.4911	169.904	22.752	bd	12.877	1733.06	0.597586	2.79935	nd	50.4673
2.67185	107.795	1885.29	4206.35	2259.5	3179.03	863.358	174.049	310.687	52.0903	259.188	64.9752	26.9366	166.971	26.808	243.572	55.2575	166.583	24.9924	166.73	29.28	bd	15.5144	1768.12	0.764221	1.24946	6.49006	57.5312
2.70705	67.9515	1911.29	4387.05	1798.77	2590.34	1060.71	257.433	402.338	82.489	474.474	130.108	43.7072	184.815	37.5192	320.821	69.5918	250.089	28.5647	208.181	32.3987	0.136818	20.399	2522.53	0.644476	1.6912	nd	37.2218
2.7422	138.025	2646.56	5559.84	1760.86	3118.27	786.318	210.91	329.452	52.8149	245.316	73.0257	29.7382	148.54	23.806	266.994	67.9396	209.905	25.9128	223.038	27.4331	0.236028	24.2503	1934.83	0.733535	1.11807	3.15426	45.8977
2.77735	111.577	3122.24	11181.5	2340.75	4345.8	1116.82	403.626	555.793	75.7063	450.312	96.4247	50.721	216.665	37.8206	378.73	135.129	363.988	54.4315	285.158	39.478	0.66509	29.3864	3143.98	0.738671	3.05068	nd	32.1604
2.8125	103.51	3652.29	7956.86	1818.8	2889.71	962.099	249.028	275.842	39.7878	177.881	72.3401	18.3569	133.077	29.6908	310.24	77.1323	222.377	26.9879	161.821	26.1076	0.116125	20.5813	1820.67	0.634106	1.1549	3.76761	37.4643
2.84765	112.765	2046.49	4636.09	2261.38	3792.33	1023.2	208.979	437.019	47.6581	201.598	45.0926	20.5393	155.608	33.8896	150.016	61.3698	188.096	24.0239	206.903	38.7411	0.11788	24.7136	1819.53	1.02758	1.39174	1.98635	61.7947
2.8828	106.61	2404.88	5661.06	2387.39	3161.12	855.19	204.705	294.311	44.4673	240.497	47.6609	16.7332	104.924	24.3597	232.774	56.0416	203.835	28.5682	182.033	28.6993	0.365155	22.8035	1709.61	0.722706	1.77901	nd	56.4067
2.91795	94.6712	2639.49	6335.84	2913.39	3998.13	1664.66	326.104	375.388	43.333	210.13	55.7189	28.1994	166.923	31.8374	275.731	62.8599	228.19	31.3153	216.14	29.6466	bd	19.6056	2081.52	0.704784	1.70472	9.38182	63.6038
2.9531	115.508	2535.3	6056.89	2242.21	3628.36	1472.13	268.046	371.224	45.0108	245.094	75.5448	20.9919	128.964	32.6781	224.117	67.8589	180.856	33.0162	208.277	30.1127	0.56201	19.9766	1931.79	0.777509	2.27158	nd	53.4692
2.9883	84.8644	1534.6	4801.01	1487.83	1957.31	658.337	152.033	188.332	34.8992	172.91	51.1387	12.2992	75.3449	23.4164	189.486	38.5427	157.872	19.5972	97.8908	16.4818	0.17752	12.0313	1230.24	0.606818	1.11839	7.73848	50.783
3.02345	81.606	2754.48	6522.33	2357.52	3168.25	1016.47	245.028	234.627	48.1061	208.794	50.7142	14.2023	102.251	23.3274	158.547	48.0285	204.368	28.8367	164.913	25.4847	bd	17.8422	1557.23	0.50367	0.77166	2.60219	65.966
3.0586	79.0964	2955.94	4859.92	3046.12	2484.59	1255.04	197.198	338.581	46.7644	192.198	67.1871	23.0746	159.211	28.422	202.69	50.1451	155.775	21.6711	140.812	24.3693	0.125472	18.6001	1648.1	0.828067	1.05215	1.70013	49.548
3.09375	77.9234	2043.81	5390.39	2460.08	2379.25	697.469	156.855	259.032	40.6974	144.122	36.2798	9.37229	106.153	23.3639	164.215	47.3938	155.91	23.8536	139.881	22.6357	0.212567	17.4146	1329.76	0.76184	0.770051	1.02203	50.2018
3.1289	75.9393	2045.65	5089.33	2401.3	3023.69	885.625	187.66	305.508	40.0837	173.258	46.8082	15.3963	154.014	19.6114	251.619	57.0347	195.252	31.3291	210.169	30.4433	0.122365	12.5047	1718.19	0.824694	1.19763	2.34326	53.0149
3.16405	105.208	1833.76	7514.8	3563.4	2089.63	1964.44	120.745	305.15	23.2395	120.625	51.3075	14.1154	103.716	22.7563	193.277	50.586	201.855	23.4713	138.236	19.0209	0.218618	11.3596	1388.1	1.34081	3.08899	190.411	41.3084
3.1992	119.895	3668.72	7861.99	2622.45	2957.51	2106.87	270.212	335.665	50.1231	217.569	78.3345	24.5437	161.661	24.6082	267.372	71.6877	245.318	32.7236	217.075	38.9253	bd	24.0566	2035.82	0.669513	1.05971	2.75552	41.2555
3.2344	85.0963	1413.86	3899.33	2281.99	2636.1	958.7	189.492	237.827	30.8524	151.974	46.1071	11.7963	121.837	19.1252	184.621	47.6871	161.571	25.0528	151.84	27.9415	0.0937531	14.3776	1407.73	0.713241	1.57476	9.77844	55.2792
3.26955	101.616	2026.53	5535.72	2245.36	2795.7	944.033	247.652	410.353	37.8252	217.11	50.0193	22.5211	114.723	20.4598	202.274	54.396	165.301	20.1893	176.687	21.7652	bd	21.4501	1761.28	0.96497	3.72351	nd	51.3954
3.3047	106.089	2231.49	6660.05	1489.94	2212.62	849.593	183.81	283.874	40.7509	235.496	81.3025	28.424	116.182	26.5827	205.534	60.9784	170.388	21.5305	141.557	30.2132	0.0978794	32.0454	1626.62	0.769017	2.47163	nd	36.2853
3.33985	139.897	3627.75	7052.35	3179.95	3535.3	1261.89	226.399	194.328	39.0631	141.87	52.822	17.7049	184.499	35.9996	276.472	83.9972	278.262	30.3625	178.113	43.9789	bd	20.0352	1783.87	0.476662	0.618354	1.62546	42.0883
3.375	113.188	1944.76	5606.82	2167.09	3383.52	1141.69	179.362	186.229	34.947	159.169	37.6501	11.1148	82.6118	22.2495	208.506	46.893	170.551	21.274	138.675	20.6246	0.220596	20.1847	1319.86	0.547946	0.918964	3.48933	72.154
3.41015	75.6313	1673.51	4187	1631.56	2199.54	620.449	134.307	178.05	33.5086	127.478	32.2366	14.5553	80.7691	20.2273	172.73	39.86	124.831	18.3275	132.006	18.0044	0.0867551	13.8228	1126.89	0.623683	0.696843	1.26279	55.1817
3.4453	76.3874	1407.41	2753.89	1988.5	2012.2	1263.29	137.699	189.047	bd	139.454	39.5743	17.3708	94.1361	25.2855	210.331	43.801	147.657	25.4244	109.846	20.1826	0.0978794	20.2698	1199.81	0.689149	1.13096	3.64606	45.9397
3.48045	94.5891	1570.57	6198.45	2620.43	3769.67	881.521	170.724	213.197	34.0752	163.531	57.9194	15.509	142.517	28.248	252.789	62.0398	221.009	39.2221	194.05	32.3049	0.12326	20.7947	1627.14	0.652128	1.2024	5.47133	60.762
3.51565	133.991	2090.63	5718.74	3374.27	4314.68	1103.48	228.779	243.288	32.8574	194.779	81.5554	23.6603	159.295	26.928	284.868	83.5742	221.722	36.9389	bd	29.9535	bd	27.4123	1648.2	0.633498	3.01551	nd	51.627
3.5508	140.884	1989.62	4983.39	2065.31	3305.34	857.2	203.096	242.635	36.6446	213.647	77.6301	17.2952	181.028	39.0596	350.736	79.5694	339.929	39.1444	266.538	34.054	0.274574	31.183	2121.01	0.651396	2.45828	nd	41.5404
3.58595	119.246	2102.1	4578.34	2083.19	3148.25	957.917	209.456	236.263	39.824	135.67	50.6722	14.3504	129.768	19.4296	221.38	56.0598	159.789	24.1104	154.688	25.4318	0.0946301	26.7014	1476.89	0.601595	0.690403	1.29017	56.1588
3.6211	113.938	3418.13	7433.23	5160.16	4307.8	998.234	243.971	379.846	45.3503	209.985	53.0121	32.1705	146.121	26.9493	257.238	75.3347	266.612	43.7096	201.951	40.8711	0.134727	21.8103	2023.12	0.838384	1.49181	4.14127	57.1822
3.65625	107.199	2110.95	4883.3	2734.01	3788.24	1187.23	220.672	306.633	34.1313	163.688	63.1458	16.5234	201.598	27.3118	239.303	60.6861	217.931	31.6626	202.791	34.593	bd	23.8355	1820.67	0.805397	1.72384	7.00269	62.4235
3.6914	115.269	3189.16	6848.84	2651.59	3530.95	1015.67	235.334	281.736	32.6484	201.33	57.3965	15.5298	125.352	32.077	314.252	81.9532	246.31	32.8114	187.878	35.3195	bd	19.5094	1879.93	0.722057	4.60323	nd	43.085
3.72655	96.5923	2261.35	5599.61	2068.23	2332.08	930.931	142.758	178.439	30.4261	169.216	43.5233	13.9481	84.9664	22.6078	168.941	53.7887	170.979	25.451	156.834	26.7926	bd	20.3596	1288.67	0.633819	1.75193	nd	43.3563
3.76175	115.89	1966.24	3773.58	2374.17	3045.64	783.472	158.017	330.661	37.6077	156.814	49.212	16.664	157.204	27.8954	234.132	45.538	212.097	29.2958	177.563	27.6617	0.132439	17.6001	1660.36	1.00747	1.30534	1.79214	66.8814
3.7969	79.6644	1595.21	3505.53	1613.48	2036.03	719.477	138.461	190.154	22.5985	135.682	32.6659	9.64336	101.634	21.3339	168.38	38.0272	164.51	18.454	144.551	25.147	0.096434	15.2004	1211.24	0.779711	3.70598	nd	53.5415
3.83205	95.165	2497.61	5106.5	2718.4	3004.88	970.068	154.487	168.698	33.7656	118.682	40.4771	16.7346	141.511	20.1185	196.125	43.4427	229.305	28.8506	176.726	25.1334	0.123485	18.5165	1394.06	0.547357	0.599795	1.19425	69.1689
3.8672	96.8707	2699.91	8522.1	2555.83	3358.45	1094.28	172.399	217.848	34.7957	160.377	65.1295	17.0425	112.244	24.3999	285.161	83.3028	249.158	36.5317	195.89	26.6678	bd	25.2769	1680.95	0.656639	1.10494	3.6778	40.3162
3.90235	118.087	2653.38	7410.78	2664.91	bd	1019.8	175.88	194.537	33.4106	164.312	38.0351	18.5494	75.8131	28.0605	216.44	55.8459	209.817	42.3151	245.06	34.2199	0.151311	18.9467	1532.3	0.590137	1.18484	8.14896	#VALUE!
3.9375	106.867	1597.43	3257.6	1533.05	1806.44	909.642	153.431	168.132	19.1437	78.9146	33.4258	9.54138	79.277	18.505	161.959	41.8374	162.122	25.6005	129.04	21.0267	0.208927	15.8123	1101.96	0.685281	1.28189	3.26816	43.1775
3.97265	108.262	1964.61	4852.05	3403.84	3328.42	1216.53	269.987	272.92	52.364	166.056	43.8047	12.9317	104.092	28.3888	218.871	50.3514	182.473	36.0232	174.198	36.7165	bd	21.9365	1649.18	0.534534	0.568593	1.11811	66.1039
4.0078	118.848	2911.44	5040.73	2530.34	3322.02	1086.73	178.215	254.872	32.3152	184.987	53.141	22.8222	70.8244	23.812	235.633	49.2947	235.983	29.4805	168.694	24.5026	bd	25.9905	1564.58	0.778171	2.67267	nd	67.391
4.043	92.3888	2353.5	4422.67	1986.41	3578.19	1101.43	185.583	206.356	27.4707	111.212	35.9416	14.0083	113.07	27.0158	210.405	50.6626	167.171	23.3793	168.478	31.3332	bd	16.9251	1372.09	0.655145	1.06837	2.57846	70.628
4.07815	112.751	2224.2	3945.65	1918.1	2755.26	1048.3	176.242	204.368	27.4022	105.486	59.8199	18.9189	103.979	26.2369	210.506	65.0687	167.832	34.0106	235.592	34.3264	bd	33.9902	1469.79	0.670781	0.992414	2.09407	42.3438
4.1133	120.72	1723.28	3863.71	1599.53	2558.71	635.853	145.828	187.48	30.1393	166.032	42.0705	27.4589	75.6558	24.0227	184.612	45.2014	179.303	24.9296	141.941	23.5867	bd	17.9556	1298.26	0.661043	1.7896	nd	56.6068
4.14845	126.009	3049.02	6611.05	2446.35	3935.64	1331.78	254.404	212.038	48.7026	252.424	56.015	15.5619	155.785	27.9559	319.013	95.3182	329.829	44.032	250.958	32.8894	0.308858	37.1344	2094.93	0.443216	1.01981	117.611	41.2895
4.1836	125.198	3462.46	5885.42	2655.72	3941.88	1090.05	222.049	366.46	41.02	209.914	70.1058	25.9954	152.65	34.3893	294.61	80.6463	313.436	41.1659	287.727	43.4709	0.305675	25.8067	2183.64	0.891022	2.01715	27.9957	48.8787
4.21875	116.656	3344.85	6475.87	2176.65	3277.35	953.522	166.699	256.394	36.9778	169.081	43.6858	16.1227	125.261	20.0223	235.128	61.054	184.107	24.8384	159.021	35.903	0.124929	25.5515	1534.3	0.765674	1.20478	3.15202	53.6796
4.2539	114.574	2476.4	7024.94	2134.98	2871.47	877.519	174.426	236.135	32.2059	155.633	40.4436	16.0554	152.771	26.3688	241.55	97.995	250.288	32.8273	186.468	29.3681	bd	16.5216	1672.54	0.731062	1.43136	6.44654	29.3022
4.28905	138.816	2542.12	4869.82	3432.11	3252.94	857.375	186.816	233.956	35.5796	141.756	51.4638	16.9788	104.848	31.373	264.441	87.9421	359.353	37.0099	219.087	36.299	bd	24.9016	1806.9	0.667431	0.914881	1.89847	36.9896
4.32425	111.88	3030.06	7074.41	2173.72	3080.28	2210.65	293.926	326.965	33.275	161.684	33.888	bd	117.836	32.2783	306.885	77.6678	250.219	33.953	242.504	34.3817	bd	24.1587	1945.46	0.71756	1.94278	11.3273	39.6597
4.3594	132.221	2473.67	4643.4	2371.01	2676.88	1240.36	187.234	242.371	37.6833	197.157	50.5345	12.2056	131.895	36.3854	227.89	68.1089	bd	35.3535	232.221	32.624	bd	24.1188	1491.66	0.673513	1.54986	nd	39.303
4.39455	130.978	2028.02	4185.48	1646.79	2208.15	817.753	163.98	218.413	21.8983	116.517	34.8841	12.3619	104.534	21.0051	157.44	39.4199	147.571	34.1292	215.667	22.5113	0.441284	14.1426	1310.33	0.8141	2.53558	nd	56.0161
4.4297	96.304	1881.91	4481.73	1839.7	2638.69	693.214	145.509	192.723	28.4272	140.016	71.1837	17.4438	87.9887	19.3688	196.505	49.1116	182.524	27.9473	167.535	30.5729	0.251774	22.6189	1356.86	0.698167	1.38469	8.13728	53.7286
4.46485	124.133	2173.72	5198.13	2970.59	3770.41	1185.36	206.173	224.812	39.7993	257.95	84.5322	21.2372	159.953	21.141	256.88	74.2966	227.231	41.3128	271.469	34.5896	0.164559	24.1136	1921.38	0.577769	5.09483	nd	50.7481
4.5	137.549	2527	6111.31	1994.94	3820.85	1510.44	235.681	228.309	43.8556	141.796	58.628	19.8523	133.969	36.159	409.497	85.497	302.146	bd	250.775	47.4439	0.488752	30.1179	1993.61	0.52141	0.577449	1.20212	44.6898
4.53515	97.991	2266.58	4816.58	1660.41	1987.28	822.839	158.059	795.148	28.3029	136.526	64.6474	15.5482	133.37	23.0705	275.925	54.2562	153.786	22.7315	186.475	33.0818	0.224414	24.3651	2080.93	2.75161	5.46201	6.49484	36.6276
4.57035	126.442	4338.37	5089.61	2491.45	3173.01	1060.64	234.62	343.811	41.5903	188.78	67.5938	15.2003	165.736	32.3793	214.625	63.1526	234.096	38.2472	219.604	38.3969	bd	24.0881	1897.83	0.804862	1.41632	3.74535	50.2436
4.6055	115.538	2097.5	5637.45	2077.47	2603.8	700.432	166.356	174.648	36.1928	151.441	50.2021	16.8268	137.212	24.013	200.579	69.0985	201.725	26.5397	148.702	29.7333	0.124165	20.6304	1433.27	0.527351	0.720193	1.98846	37.6825
4.64065	122.796	3049.34	9019.19	3733.9	3656.12	1276.29	179.046	309.061	41.3483	198.025	59.4594	17.5531	112.935	30.7343	331.658	90.7526	276.698	41.5648	239.86	37.2548	0.160017	30.9548	1965.95	0.843157	1.42981	4.61503	40.2866
4.6758	95.7575	1684.7	8272.93	2183.39	2683.21	737.048	180.153	176.266	34.0775	133.845	46.565	7.27428	98.7087	23.2396	226.991	68.7388	156.309	33.4869	151.016	19.6709	bd	24.6688	1356.34	0.522975	0.706155	1.82673	39.0348
4.71095	39.2137	1728.97	8099.7	1596.33	974.411	581.128	50.3294	82.0595	12.1455	54.8776	19.4456	6.42955	26.2241	7.92006	71.5377	16.2246	66.32	7.62407	63.6037	9.26987	bd	13.0659	494.011	0.779713	1.14766	2.66799	60.0577
4.7461	57.405	2453.73	5951.49	2543.78	1295.58	718.943	85.954	175.614	13.7651	74.8556	28.4264	7.69134	41.5939	13.9254	139.603	33.491	89.6482	11.5406	91.122	14.7628	bd	26.4624	821.994	1.16856	3.49706	nd	38.6845
4.78125	51.5205	1764.37	5100.9	1731.85	903.885	753.526	79.3159	168.081	18.8849	62.9235	16.5941	11.3893	49.5736	7.33901	90.5478	23.8404	81.4918	12.2121	72.7346	13.859	bd	26.1102	708.787	1.02005	1.01427	0.989076	37.9139
4.8164	73.7438	2503.65	10575.9	2558.03	1809.48	1518.25	102.136	241.574	26.9629	83.5221	19.5936	11.0114	51.5076	12.7198	141.159	48.756	143.408	19.9451	147.855	21.5344	0.0600678	29.5843	1071.68	1.0816	0.958707	0.79277	37.113
4.8516	87.1907	3673.27	6078.76	2537.17	1447.79	1015.98	103.399	162.663	17.8862	65.4542	23.0046	9.95108	47.1028	10.3117	119.739	29.6747	103.746	15.7853	132.153	15.6843	0.0508396	28.4686	856.555	0.872717	1.13995	1.65035	48.7889
4.88675	54.9625	2785.79	6769.68	1669.27	1058.59	770.351	76.989	241.066	13.9181	69.7927	16.1063	6.8359	32.5245	9.57917	97.3548	29.5722	94.6621	15.4238	108.009	13.101	bd	23.754	824.935	1.70588	3.70155	12.9604	35.7967
4.9219	65.2205	2936.49	7399.64	2194.12	1617.24	1276	103.82	128.644	26.4951	79.0688	18.722	11.6472	75.1488	13.6969	126.989	38.0617	123.967	21.9344	136.094	20.4163	0.383757	34.9502	924.705	0.576412	0.504643	0.778153	42.4899
4.95705	46.9948	1744.58	5016.06	1474.87	1079.53	569.805	70.1741	85.5297	12.3938	50.2898	16.3813	9.53086	35.6457	9.75292	97.0215	28.0118	104.432	16.9562	81.7822	12.5983	bd	27.5945	630.501	0.670444	0.984658	2.17856	38.5385
4.9922	51.0696	2505.24	7990.07	2257.9	1470.62	979.659	74.7275	159.2	15.8089	72.8993	19.7348	11.4819	46.7487	8.37104	98.3814	24.7073	80.1647	12.3685	103.728	9.73467	bd	33.7426	738.056	1.08394	1.77895	3.52182	59.5219
5.02735	60.2046	5338.94	14113.1	1868.68	1266.36	1164.57	53.2155	96.5478	19.8438	61.9587	26.7116	10.6908	33.3538	9.71233	84.6493	30.1055	86.7134	13.1223	95.4364	16.3168	0.0564037	27.4546	638.378	0.685531	0.523984	0.567894	42.0641
5.0625	74.4054	2120.67	5348.01	1944.52	1644.72	2216.34	83.1575	112.161	15.2367	62.575	19.8004	5.2981	41.7257	8.92477	77.1558	28.148	116.374	14.5949	100.347	15.2014	0.0588011	23.7865	700.7	0.73071	1.06859	2.19428	58.4312
5.0625	62.4487	1819.9	5134.77	2355.91	1256.55	1579.62	88.9685	178.374	14.2496	81.508	27.721	7.75422	58.7591	8.66461	102.583	29.2804	84.8694	13.3051	106.228	21.0315	0.139338	31.9756	823.297	1.14666	4.22641	nd	42.9143
5.09765	59.7576	2195.86	bd	2358.71	1384.92	789.873	79.0414	126.058	16.4989	77.2516	21.8054	9.65781	45.3117	12.6378	106.685	30.9154	116.209	19.7179	103.458	16.7407	0.130158	26.3017	781.988	0.816387	1.39218	4.05607	44.7971
5.1328	55.1107	2355.28	6623.7	1986.4	1187.23	1384.24	51.0328	123.957	16.9452	47.2897	7.17027	9.71009	57.6844	10.4362	97.1803	26.1808	73.3722	15.4641	101.498	15.7814	bd	29.0585	653.703	0.981764	0.72481	0.55008	45.3474
5.16795	64.9337	2549.52	9806.43	2088.47	1126.72	1082.17	56.3179	88.1499	12.8077	61.6963	16.8779	6.35601	41.9649	10.2985	98.3524	24.6312	72.339	17.435	98.3836	14.4379	0.334007	24.3702	620.048	0.770136	1.33391	5.02605	45.7437
5.2031	95.9432	3965.32	11569.8	3115	1745.55	2099.94	63.1762	159.812	23.453	72.7363	12.2284	8.28145	68.7169	13.4266	130.52	30.6191	129.156	17.4565	116.145	18.8089	bd	56.1098	864.536	0.958367	0.729845	0.564749	57.0084
5.23825	57.3541	2218.84	7433.63	1679.18	1092.92	710.773	60.0463	112.703	14.6165	41.7018	14.5477	6.24773	28.4855	8.71014	71.2121	20.7505	67.9153	11.1001	92.1648	11.3129	bd	23.9745	561.514	0.893801	0.775659	0.770257	52.6699
5.27345	77.4803	8328.07	9464.82	3888.57	1863.97	1409.43	96.0218	210.142	21.8237	79.0987	18.9069	8.97766	66.2061	15.6429	154.066	41.3902	134.057	21.8195	149.732	27.2012	0.0781082	32.4957	1045.09	1.07711	1.19421	1.22819	45.034
5.3086	50.8073	2387.32	5963.83	1416.02	975.024	618.984	44.1157	107.245	15.0473	41.9492	11.9836	8.40476	26.6594	7.99098	85.9006	25.2102	81.4555	11.2685	84.7813	12.0867	0.0953943	25.5994	564.099	0.967657	0.705688	0.534848	38.6758
5.34375	58.8458	2333.62	5023.7	3261.15	1775.7	991.48	65.622	142.435	17.7092	61.616	13.9903	9.29476	43.9019	12.6361	101.865	36.0814	122.653	17.776	126.969	19.2327	bd	23.9427	791.782	0.981435	0.955639	0.947266	49.2138
5.3789	90.8667	4314.88	8389.49	3741.34	2390.61	1393.73	90.2271	209.528	23.2182	87.2765	20.5803	7.29006	64.5817	19.7115	171.89	46.3157	150.902	23.807	158.383	25.2834	0.295355	75.2918	1098.99	1.07577	1.16659	1.18585	51.6155
5.41405	76.6752	3942.68	6559.53	2873.08	1468.84	1374.02	87.0552	158.035	20.5066	74.9063	32.2331	8.32645	61.885	11.6215	124.139	37.4377	145.972	21.6648	157.342	33.3409	0.308571	33.9325	974.466	0.878352	0.96403	1.2067	39.2343
5.4492	54.0678	2593.43	4591.06	1569.29	1120.97	631.36	51.8446	115.593	10.9177	35.9124	11.4671	3.65657	37.812	5.8938	61.9982	23.3801	72.3817	12.178	86.419	11.9966	0.175685	24.4113	541.45	1.13678	1.19248	1.09342	47.9455
5.48435	57.0797	2618.18	5769.78	1666.74	963.272	645.35	59.8159	78.1391	11.8427	38.1776	11.0763	6.24337	24.0449	8.0553	66.7848	22.5955	78.3637	13.1926	71.5738	12.4296	bd	21.2411	502.335	0.684604	0.72999	1.12439	42.6311
5.51955	77.4433	3002.1	6525.92	2062.79	1154.2	1504.1	73.8306	92.5257	10.8506	51.0186	9.24901	7.22749	28.5288	9.03386	84.0858	26.6662	83.5233	12.7082	90.8475	12.3048	bd	22.4	592.4	0.740337	1.56747	5.9875	43.2831
5.5547	63.0877	2482.96	7593.98	1455.15	977.11	495.174	49.0221	68.7379	7.05989	30.9777	8.08181	5.24981	23.0899	6.95662	70.5197	24.3351	80.734	11.3726	59.1305	10.9624	bd	18.473	456.23	0.834479	1.5692	3.75462	40.1523
5.58985	73.5311	5354.78	5570.1	2098.65	1181.04	1183.73	55.2906	85.8081	11.6106	46.6541	15.2945	4.51513	37.6668	7.2089	61.8878	18.7414	85.4645	14.5219	75.0662	12.5364	0.271304	19.917	532.267	0.792282	1.04027	1.77134	63.0178
5.625	57.7264	3154.5	6309.59	1520.52	1114.54	721.54	41.3735	120.484	12.0239	49.6496	22.304	5.69473	23.713	9.06077	86.8752	31.3102	86.7884	14.631	76.1451	14.3695	0.115146	20.7248	594.423	1.26658	1.46622	1.41231	35.5967
5.66015	82.665	2062.14	11361.1	2450.04	1822.35	2681.88	50.5638	87.7493	12.7995	47.343	18.8896	7.84841	28.8261	10.9392	113.363	29.0176	121.91	22.5535	114.906	18.9768	bd	32.4702	685.685	0.810577	0.869785	1.15728	62.8013
5.6953	46.5543	2607.24	8407.88	2317.48	1123.79	966.774	50.1138	44.3951	9.50666	36.157	12.0947	5.27058	13.4813	5.2357	71.244	23.8892	82.6141	12.6024	99.3644	12.3261	0.220575	48.5387	478.295	0.472933	0.612238	1.65963	47.0417
5.73045	63.1594	3141.33	8477.16	1652.48	1104.66	988.004	46.7515	99.7385	10.3247	34.4223	9.97	5.02107	26.3626	7.46286	76.0407	20.0431	61.3709	12.2974	65.1746	10.9069	0.11201	31.4336	485.887	1.06422	1.10149	1.06752	55.1144
5.7656	69.1534	1881.51	7261.15	3657.69	1231.92	1168.84	36.2358	144.958	18.3038	37.7917	13.2446	4.08802	29.8816	8.02665	77.7621	20.1371	98.1859	12.2815	81.023	12.81	bd	25.4465	594.73	1.24827	0.667757	0.277925	61.1768
5.8008	57.3247	2199.29	13160.7	2764.17	960.272	1751.45	34.6138	73.5826	11.35	33.862	9.41461	3.59656	33.7098	6.91335	66.8404	21.0816	85.8991	14.9523	94.3852	13.9408	0.10577	24.4454	504.142	0.865349	0.673669	0.605393	45.5502
5.83595	64.9035	2569.09	6409.32	1992.53	1062.9	950.162	35.2072	79.0348	8.7539	28.2978	17.3541	3.92876	21.1297	6.80159	90.2898	22.7299	102.352	10.421	82.6507	14.3543	bd	22.4664	523.306	1.0579	1.00128	0.899366	46.7623
5.8711	57.7217	2025.96	6689.79	1437.09	766.171	1339.27	38.657	102.558	6.04093	28.1342	12.0279	3.70389	19.5873	6.40111	68.3242	24.2953	65.0008	9.23972	88.4033	9.72531	0.0998758	19.4879	482.098	1.53173	3.05958	5.1699	31.5357
5.90625	63.7084	2644.55	4440.5	1940.6	1056.25	1892.78	33.3872	58.5449	7.82688	57.8839	14.6819	7.22618	18.9085	8.08406	80.5595	23.9649	113.777	14.4324	85.727	14.2869	bd	69.0632	539.291	0.850399	nd	nd	44.0749
5.9414	49.5228	3137.31	10283.4	2245.86	1077.29	750.949	33.5537	94.2978	8.35773	36.2749	9.76215	7.04748	27.9477	5.98368	57.1139	22.9642	68.8828	7.24162	73.7646	13.4608	bd	22.0428	466.653	1.32323	1.7851	2.05106	46.9119
5.97655	61.717	3747.5	6486.61	2114.62	1158.91	1121.31	58.5576	106.149	11.0211	39.4882	8.36828	9.35643	33.0379	8.98669	91.8202	28.6539	94.02	11.7898	83.3558	15.0524	0.056818	41.0279	599.658	0.970998	1.17974	1.44517	40.4452
6.0117	62.9052	2538.16	5010.92	1934.96	1113.78	739.288	42.7102	89.4886	11.0019	33.0091	14.319	2.76846	35.6024	6.46264	85.6525	27.9847	90.2274	10.9148	72.9134	12.5493	bd	46.9409	535.604	0.970121	0.848843	0.776543	39.7997
6.04685	58.7194	3797.84	4541.53	1619.5	1170.41	503.009	50.0242	89.078	9.72871	31.7546	18.4537	5.59784	31.6799	8.75959	64.4136	26.9306	81.4088	15.4131	118.111	13.9641	0.245462	25.2685	565.318	0.940502	1.02413	1.16846	43.46
6.08205	34.2798	2007.44	9502.81	2024.96	1133.82	901.771	39.2399	43.5366	5.99808	32.9001	10.1873	3.48955	26.3353	5.97718	62.9936	21.7626	66.4705	10.3087	55.9739	10.5086	bd	17.0359	395.682	0.645945	2.05408	nd	52.0995
6.1172	54.4552	2161.73	4239.47	1830.7	1020.99	1029.97	46.0274	71.0705	7.42143	29.8362	5.62646	4.7096	26.3647	6.82398	71.8192	22.5987	77.0173	16.2465	82.5566	14.155	0.0445847	33.81	482.274	0.880816	1.34888	2.31089	45.179
6.15235	72.5398	2796.03	11140.2	1752.21	1159.56	967.197	41.7318	74.9251	9.05824	32.6131	11.0746	5.26989	32.2767	7.83268	75.518	27.7734	102.343	11.5762	84.956	13.321	bd	29.5755	530.27	0.902816	1.01845	1.26672	41.7507
6.1875	64.8835	2227.1	7097.22	1987.68	1365.71	1015.01	52.492	84.0316	9.91969	28.9412	4.43504	5.0763	36.8871	8.5392	84.0876	20.6472	91.063	13.5268	82.6943	14.9118	0.159201	34.421	537.253	0.856017	0.865834	1.02017	66.1449
6.22265	58.9081	2957.36	4740.16	1626.08	1166.29	673.604	27.7901	16.4141	5.8485	33.8475	6.57809	3.73563	11.8492	4.66267	54.8032	19.9503	90.3659	15.6858	93.2678	11.8818	0.0966944	21.715	396.68	0.301231	1.00312	nd	58.4598
6.2578	53.2996	2028.41	7709.21	1788.65	867.443	858.922	34.5192	46.9812	5.1397	27.1214	10.0257	3.22792	20.486	7.01467	58.863	14.9103	61.9734	9.76324	63.53	12.3051	bd	18.372	375.861	0.800171	2.26222	nd	58.1774
6.29295	31.3979	1444.53	3454.65	1556.3	742.584	1175.45	23.6871	34.5702	3.9296	16.5487	5.26192	1.88696	13.7306	4.28338	51.9317	14.953	68.1104	7.54183	59.672	10.0603	0.143979	22.2101	316.168	0.823304	1.326	2.6788	49.6612
6.32815	69.9218	3768.22	4248.03	2550.22	1203.65	1215.26	42.367	46.9822	6.95853	18.228	6.38625	4.08715	31.9183	5.61532	54.2051	18.266	90.249	14.0153	73.5063	9.83965	0.101717	27.9626	422.624	0.62804	0.64245	1.03835	65.8955
6.3633	69.1615	3936.84	7149.6	3410.45	1016.8	1005.53	35.5228	34.2296	10.5474	18.1225	9.3651	2.93781	18.6371	5.88788	86.6834	26.413	69.9649	13.3401	90.0792	13.9523	bd	26.0682	435.683	0.414307	0.255466	0.425795	38.4961
6.39845	86.6513	2573.12	6662.45	2092.33	832.801	1069.48	35.7663	42.764	7.45738	32.7926	3.49285	3.26924	22.3858	5.93518	60.5014	21.7701	75.5694	11.0317	88.1105	13.3281	0.223267	25.1444	424.174	0.612355	0.927661	2.62387	38.2544
6.4336	69.4989	2626.85	10101.1	2193.93	1458.88	1199.07	38.1871	69.4152	8.70518	35.6767	10.7725	2.38365	32.1568	6.03872	76.576	24.8961	105.517	16.0343	80.4024	13.2607	bd	37.5643	520.022	0.893386	1.15407	1.75006	58.5988
6.46875	73.999	2700.66	4570.98	1918.19	1017.28	813.588	25.302	46.4934	5.53904	32.3632	4.02355	4.24575	25.8657	6.9038	65.438	17.9863	70.912	8.92304	84.1809	11.8222	bd	18.5668	409.999	0.920375	3.15197	nd	56.5586
6.5039	80.2525	4138.3	5930.03	2710.13	1067.02	1208.03	46.5175	75.6608	7.9067	24.5388	17.7929	4.44503	23.7108	6.46971	64.8912	21.9766	71.6237	15.4417	105.796	15.7295	bd	27.2178	502.501	0.908717	1.02552	1.23473	48.5526
6.53905	49.8279	2841.83	6644.65	2505.86	1022.53	911.774	39.327	65.7249	5.47848	20.8306	10.1076	3.33381	23.9379	5.54793	81.8276	21.766	73.9042	12.3994	95.5919	15.3294	bd	46.89	475.107	1.00651	1.57229	2.25828	46.9784
6.5742	46.0439	3696.46	5595.49	1971.96	748.264	919.202	22.6667	58.8906	5.03979	21.0853	4.7422	4.70859	24.2249	6.89761	55.2553	13.214	59.7735	10.2663	62.4776	12.8485	bd	28.9745	362.091	1.29197	1.74366	1.94475	56.6266
6.6094	62.982	3525.35	5048.56	1661.77	962.094	671.618	36.6009	66.5879	9.31999	25.4303	14.1376	3.88525	20.9984	6.85355	73.4008	18.6164	60.3346	bd	74.3413	10.0156	0.0931043	23.5375	420.523	0.847245	0.697452	0.699269	51.68
6.64455	75.0659	3509.66	7555.26	2503.99	1164.08	826.481	44.8869	73.123	6.81815	34.3528	11.7704	4.75579	32.4954	7.135	63.9961	24.0428	86.9028	13.77	86.387	14.166	0.0588842	22.5131	504.602	0.950671	2.32089	17.6736	48.4171
6.6797	60.1662	3474.1	6020.38	3256.58	1179.64	889.437	36.779	97.5191	7.25886	35.8548	10.0528	3.52335	35.3075	4.56894	64.891	21.1692	77.1037	8.52893	62.4666	12.9868	bd	34.5638	478.011	1.39147	2.7632	8.48403	55.7242
6.71485	59.6982	4083.97	6782.26	2737.07	1031.53	1212.65	42.4492	58.5993	7.18109	39.0184	6.52422	4.49549	31.24	8.61337	80.6735	20.3769	87.0665	16.3621	87.5992	16.8438	0.208116	34.2237	507.043	0.772718	2.22999	nd	50.6225
6.75	64.41	3218.68	10490.5	2030.02	1062.76	1026.21	38.7791	38.8511	8.95483	41.706	5.31147	4.51144	27.3735	9.58226	57.7017	24.4849	88.5848	11.7395	82.0822	16.3213	0.063133	27.6669	455.984	0.489385	0.781921	3.49927	43.4047
6.78515	50.0247	2053.41	9869.16	2430.84	872.59	688.15	28.9558	35.4643	4.15804	21.8515	10.8357	3.87369	18.1631	5.73813	51.5319	19.1507	61.2156	12.9358	71.6602	11.0959	0.108959	22.0178	356.63	0.729659	2.08372	nd	45.5643
6.8203	62.3961	4004.83	4508.85	1893.11	1414.88	1014.19	45.0328	92.9814	8.18663	38.2244	11.7191	4.52657	21.9558	5.46447	80.1241	21.2857	78.5796	13.9868	95.8833	15.7857	0.085704	25.5114	533.737	1.12228	2.05757	4.54288	66.4709
6.85545	63.8825	4179.8	14913.6	2098.8	1534.73	1196.69	39.3841	88.347	7.23807	27.087	11.0733	5.17788	35.4551	8.61671	99.5044	35.1529	102.029	18.2074	102.623	15.4874	bd	38.9579	595.383	1.21374	1.56965	1.64148	43.6586
6.89065	51.8108	2317.72	6628.02	2509.99	984.772	470.631	31.7329	87.8609	6.5517	17.6878	7.70582	7.85839	32.142	4.24435	75.4885	32.7184	81.1244	13.0158	91.3784	13.285	bd	20.1977	502.794	1.42431	1.3002	0.852488	30.0984
6.9258	bd	2300.44	6443.12	2134.89	910.71	597.973	20.486	17.1812	5.18734	bd	9.57935	3.00501	12.3345	6.09525	61.241	19.3715	71.2471	7.78692	68.6083	12.0839	bd	27.6472	314.207	0.39167	0.441716	1.29239	47.013
6.96095	63.7719	3729.44	5771.08	3315.75	1306.44	589.491	42.349	30.1004	4.77939	22.1626	8.31076	5.13032	25.4727	7.96644	72.0099	25.4543	98.7324	13.8655	85.5304	15.0638	0.144305	36.5995	456.928	0.458924	1.12506	6.90348	51.3248
6.9961	70.6533	1792.49	9027.76	2151.12	1203.26	986.207	39.1616	50.512	7.69617	22.4863	8.43212	4.75183	21.5301	5.66706	69.2455	20.9801	94.0649	11.7131	99.462	16.124	bd	29.7659	471.827	0.678156	0.671526	0.982792	57.3523
7.03125	68.454	2459.31	9891.72	1388.57	737.878	593.582	27.361	48.3197	5.1731	25.5449	3.75578	4.25694	18.7839	6.1544	54.759	17.386	70.9352	13.2174	90.8529	12.3465	0.179906	22.2862	398.847	0.944134	1.9198	8.80874	42.4408
7.0664	66.2055	2473.98	10974.9	2472.18	1104.94	1228.33	37.4908	73.42	4.06229	26.6782	15.1669	0.706107	26.9212	6.58067	91.2091	27.0961	84.4107	16.3802	86.5417	15.24	bd	22.7731	511.904	1.28016	20.0981	nd	40.7787
7.10155	71.0055	2145.5	7729.14	3035.58	1364.47	716.948	28.8487	52.6694	6.87438	35.2144	13.5548	3.24985	27.7695	7.59835	85.8116	22.9816	93.1614	16.7053	98.8291	19.4712	0.0805071	41.9019	512.74	0.878465	1.7349	23.1146	59.3721
7.13675	65.3622	2487.28	6228.33	3039.41	1321.33	1342.39	44.8158	52.3134	3.68981	21.1334	7.15195	2.11134	30.9925	9.21569	79.0288	24.4845	105.025	17.13	109.29	16.203	0.685174	36.4151	522.585	0.822089	4.81651	nd	53.966
7.1719	78.8798	2282.81	5196.92	2791.54	918.921	666.357	29.0559	35.5261	5.26814	23.2559	7.51023	2.65921	19.6953	5.64351	80.9442	22.6592	96.9639	16.7765	104.199	14.4283	0.0713788	40.8507	464.585	0.665313	1.0983	3.08289	40.554
7.20705	44.721	2277.26	3855.07	2658.3	943.211	524.925	22.9199	51.0419	3.31899	27.627	6.67203	1.36373	15.8671	5.10324	53.0296	17.2997	63.2829	10.4751	60.2527	15.1783	0.589915	16.0478	353.432	1.3227	nd	nd	54.5219
7.2422	80.3207	4161.94	9156.52	2796.12	1466.17	1891.15	52.8306	69.9625	5.59646	26.8061	10.3829	4.59902	42.9753	7.66016	76.9189	25.4862	126.488	16.5792	125.479	16.2087	0.0822756	49.5233	607.973	0.871499	2.39205	10.0763	57.5281
7.27735	56.0448	1741.33	17320	1374.36	770.901	1230.47	20.0235	52.3051	2.21221	20.8256	3.78257	3.91109	20.3818	4.64489	39.9135	13.1793	60.5728	7.76805	54.216	9.49131	0.13578	22.8832	313.228	1.69761	nd	nd	58.4934
7.3125	86.9592	3146.05	21969.1	2419.31	1221.8	1279.24	41.4479	30.7216	9.58476	35.3231	2.54567	4.26521	31.8334	9.16721	91.5775	25.3256	102.029	17.0473	128.434	20.8771	0.0807556	29.3482	550.18	0.361819	0.404968	1.25557	48.2436
7.34765	65.6463	1710.03	22950	2752.67	1313.31	699.948	35.0519	33.9365	6.22323	29.81	6.19736	4.57384	24.9571	5.78414	61.5465	24.954	90.2233	12.3633	103.08	19.2285	0.118391	32.7401	457.93	0.531426	1.04358	6.01626	52.6293
7.3828	73.9461	3358.92	7838.54	1785.12	930.455	1056	36.3937	35.9115	5.00466	21.6551	6.92721	3.06834	36.2477	2.72993	64.8358	21.8504	77.3285	15.9914	115.988	20.5239	0.054892	40.2698	464.456	0.596992	1.12951	3.65877	42.583
7.418	110.424	3545.86	14983.5	2459.8	1723.04	1006.52	69.1208	123.304	13.0355	28.6835	7.21631	2.9312	46.4963	10.6113	87.3821	24.7049	105.971	16.2581	118.366	26.0227	bd	105.559	680.104	0.95473	0.820423	0.778064	69.7448
7.45315	56.6036	3409.93	8517.8	2318.82	1172.61	1358.73	31.7866	62.7838	5.64579	15.4981	5.50644	0.442671	21.0944	5.03524	48.9562	19.4224	71.0007	11.6933	60.4669	10.3464	0.095612	42.0669	369.679	1.08397	1.08984	1.00924	60.3743
7.4883	63.8519	6461.99	5198.67	2265.58	867.407	753.641	20.7668	18.023	6.26938	16.3061	2.77888	3.61023	24.9887	4.31129	55.7485	18.3904	60.5367	11.2766	72.8932	10.068	bd	12.9455	325.968	0.369813	0.27237	0.56087	47.1663
7.52345	87.3966	2718.3	8247.18	2977.84	1212.86	1037.14	28.1859	38.7354	5.05941	22.4822	11.3194	1.46053	21.8625	7.97453	88.216	21.3422	78.9262	12.7432	86.9209	14.0201	0.0672302	35.3791	439.248	0.750927	1.26153	3.2338	56.8292
7.5586	41.4047	1400.53	3706.59	2111.93	1158.69	639.522	22.5438	50.7506	5.01023	29.2974	6.88964	2.03391	12.9074	4.11622	40.0582	14.6102	47.8576	7.41045	58.4438	12.5128	bd	20.3845	314.442	1.11969	3.82034	nd	79.3071
7.59375	53.234	2912.58	5960.18	2844.64	999.632	966.223	25.1254	41.5583	5.03047	14.8987	10.7221	2.97877	15.9447	4.20393	57.914	16.8007	66.671	12.8659	73.5693	10.8085	0.0599302	23.7999	359.092	0.862576	0.853758	0.981867	59.4993
7.6289	51.6617	2510.14	10648	2646.78	883.077	936.064	28.5335	63.7758	3.48809	15.6196	6.80481	3.65182	13.8989	6.2976	56.4983	19.7895	69.3398	6.91942	59.3699	11.807	bd	24.0214	365.794	1.40714	3.05481	4.97353	44.6236
7.66405	32.1103	1019.43	3617.04	1255.71	630.633	516.673	14.9913	15.4271	2.78107	15.4207	3.2613	0.769838	14.3574	4.11139	35.3108	9.08593	39.6801	4.24223	44.5727	4.83545	bd	22.5097	208.847	0.554609	1.63725	nd	69.4076
7.69925	77.0199	2618.42	13441.3	2459.11	1344.97	951.977	27.0064	33.7282	7.33454	23.4504	14.3926	5.74864	25.366	6.66873	88.2739	31.6116	84.5482	19.871	106.929	18.4254	bd	28.1115	493.355	0.562858	0.50517	0.808874	42.5468
7.7344	63.2558	2849.81	7719.75	2164.32	1116.69	1264.61	21.3027	39.4682	4.88899	20.6929	3.17378	3.93551	16.0506	4.92396	47.2388	21.0038	68.1268	13.8185	77.9977	14.0498	bd	29.613	356.672	0.907673	1.22637	1.97886	53.1659
7.76955	48.9519	1346.3	3458.02	1858.91	650.935	569.147	15.6256	25.8873	5.04007	15.2702	4.16338	1.72047	10.5277	3.17909	30.154	12.1053	46.4535	9.11099	61.7849	9.31684	bd	17.7313	250.339	0.680656	0.540053	0.628557	53.7726
7.8047	54.4197	2540.59	6879.55	2153.52	729.277	774.36	25.5265	42.3521	3.17394	15.6696	3.29193	2.10775	11.8351	3.59599	54.8333	15.1058	59.8402	11.1469	67.8864	8.47981	0.104951	40.0259	324.845	1.03875	2.74108	13.3399	48.2781
7.83985	60.8697	1998.79	6543.33	3059.68	867.135	1127.48	22.5907	64.9272	5.19688	15.3871	9.4451	3.34523	24.1815	4.04509	58.7705	17.0836	60.2215	10.3399	93.8788	17.3893	bd	20.4207	406.802	1.40645	1.29085	0.85422	50.7585
7.875	64.4546	3759.69	7236.4	1457.64	1001.67	1674.91	29.0672	25.5273	4.0789	12.0719	7.76763	2.49987	16.5278	5.30534	70.4674	21.5584	68.6496	10.79	85.2974	12.7037	bd	bd	372.313	0.527541	0.646428	1.39961	46.463
7.91015	59.7119	4315.84	23054.7	2068.58	1130.04	1364.11	32.1032	60.8202	5.17518	17.166	3.00872	2.44423	23.9649	6.75054	88.9782	21.1492	75.5713	14.7556	73.7902	14.3659	0.0715242	44.6412	440.043	1.08081	1.33374	1.44926	53.4318
7.94535	72.3145	3621.32	9559.37	2918.9	1007.7	831.286	26.3182	44.5855	7.10169	23.9618	5.7336	5.7163	15.4473	3.38932	55.147	25.2099	83.4346	10.8778	96.0261	15.8715	0.136983	46.0691	418.82	0.766046	0.723918	0.892848	39.9723
7.9805	49.4684	1799.56	9798.89	2326.7	750.739	1156.05	24.5176	60.4661	3.19167	17.9873	6.22654	2.50612	19.0845	4.18474	52.8226	15.0791	72.768	10.775	90.6213	14.802	0.108116	28.4384	395.033	1.52058	5.98192	nd	49.7868
8.01565	71.5949	3321.37	10136.3	2206.85	931.291	1709.76	24.9686	31.074	3.01534	19.8506	6.69929	2.33616	17.1056	5.68316	51.073	15.2613	74.4105	15.1269	62.6488	13.0332	0.291679	30.5976	342.286	0.786598	11.9753	nd	61.0231
8.0508	61.4534	1662.03	8874.69	1422.66	641.069	725.379	18.9774	21.4666	2.57456	16.4621	2.95185	2.90859	17.0697	3.28431	44.9997	13.6052	66.2197	10.3321	71.0658	9.70378	bd	19.5559	301.621	0.687613	6.31309	nd	47.1194
8.08595	41.8167	2136.76	2875.45	1305.91	502.862	565.767	9.33628	11.5923	1.96671	6.98563	3.5747	0.949555	8.36831	2.12282	23.2215	6.61249	33.6179	6.48006	42.2003	6.08382	bd	13.2129	163.112	0.632965	0.71536	1.26694	76.0473
8.1211	53.7638	3844.09	9904.66	3026.97	757.315	1389.95	28.9496	32.8478	3.45265	14.1565	6.43675	3.04071	17.4841	4.36872	41.4928	15.1939	52.6714	8.81205	53.3516	15.0313	bd	34.4072	297.29	0.720039	1.37782	3.35071	49.8433
8.15625	82.2962	4176.19	11974.8	4604.23	1346.78	1832.59	34.2738	92.4181	7.24283	19.749	6.68345	3.94852	13.3087	4.76167	70.5233	20.5429	95.0386	12.8694	105.593	21.1476	0.0794406	38.9944	508.1	1.37263	1.24506	0.841959	65.5595
8.1914	56.9202	3241.34	4729.92	2450.16	1144.89	1162.37	23.3511	39.6549	3.3677	14.8466	6.26531	1.34425	21.3353	3.86508	64.7771	14.6192	70.4986	9.35128	73.1208	14.4775	bd	25.9444	360.875	1.01013	1.91329	3.84695	78.3143
8.2266	73.5514	4192.16	6026.96	1679.61	541.204	710.138	24.26	85.2444	3.62165	13.7958	2.35106	1.9431	14.0915	2.84942	32.4178	15.3303	57.9607	10.0221	64.5894	9.89235	bd	21.4223	338.369	2.06383	3.09165	2.11788	35.303
8.26175	68.4009	3865.95	14939.4	2596.35	1038.75	1337.82	24.4765	39.3551	4.5472	31.6393	5.02655	2.54473	16.1501	5.74957	52.0524	15.8284	64.9169	14.4192	97.2322	13.7195	0.0683058	43.3074	387.658	0.866024	nd	nd	65.6258
8.2969	94.5745	4519.92	11909.6	4388.01	1433.76	1990.97	38.0862	48.5761	6.15379	31.0313	4.75942	6.74362	28.5264	5.30714	83.1604	28.7194	111.265	15.414	110.401	17.7068	0.0904691	41.209	535.85	0.72697	1.71201	17.0501	49.9233
8.33205	76.202	1946.63	8662.42	4446.13	1246.68	1624.13	35.4547	34.8448	6.19896	21.1436	6.82808	2.01573	21.1033	5.79331	66.4523	24.0889	81.6282	11.4457	119.694	15.8619	0.13044	50.6554	452.554	0.542849	0.654901	1.4062	51.7532
8.3672	128.266	6275.68	8760.52	4200.01	1485.37	1943.87	47.4795	259.18	7.4368	19.7403	10.256	5.22816	39.2892	7.57082	95.3646	39.2361	141.656	19.6575	137.051	22.2236	0.0885978	58.7245	851.37	3.14886	3.3432	1.10372	37.8572
8.40235	65.3151	1783.26	7203.12	3082.28	1184.28	630.606	21.9518	39.9802	4.20882	16.9068	7.25957	3.06203	13.6005	4.46317	48.4048	18.1069	97.2748	10.6408	84.4743	11.7321	bd	33.1175	382.067	0.967866	1.33649	1.93798	65.4048
8.4375	50.2618	1667.9	8418.64	2528.04	944.961	853.269	20.7854	22.7163	3.48093	15.8931	2.48573	1.22465	11.2682	5.38078	51.5273	15.5934	61.9353	9.26672	60.9894	11.0516	0.119069	23.6022	293.599	0.614219	1.1307	4.13091	60.6002
8.47265	68.6666	2510.2	9355.16	1940.15	1113.35	1368.43	27.4791	11.8073	6.80465	28.5455	5.00088	4.92215	21.3436	4.91793	77.3351	22.7845	116.064	13.5541	94.7439	12.1661	0.0528221	44.7552	447.469	0.202898	0.259985	1.76562	48.8644
8.50785	101.64	3080.36	7402.95	2670.97	1693.01	1104.78	30.722	25.5434	5.53865	15.5375	14.8372	3.12836	36.3973	5.73755	73.325	30.6809	109.604	17.5502	116.531	19.7676	0.202775	52.0224	504.9	0.453491	0.458563	1.01928	55.1811
8.543	54.8887	5296.77	7844.3	2645.22	1051.53	899.791	21.944	37.6133	4.42956	17.0979	4.87911	1.72759	20.1062	3.07515	39.7101	17.2725	76.2156	11.9546	88.8943	12.1667	0.0932079	22.6479	357.087	0.890654	1.13374	1.62547	60.8792
8.57815	62.3435	3129.2	7863.3	1499.14	830.264	953.383	21.2494	29.0213	3.89016	14.5581	3.96761	2.05048	14.8702	4.45098	42.3605	15.5137	48.5113	9.33402	67.4735	9.23016	0.142422	25.1273	286.482	0.740167	0.959365	1.64785	53.5181
8.6133	49.5694	1553.06	8247.77	1905.05	732.619	630.697	19.3343	30.5829	3.19109	13.6145	3.24548	1.91757	11.2984	3.03735	36.8418	14.5082	69.7741	6.72226	51.9006	11.0626	0.0886467	35.6236	277.031	0.894126	1.47436	2.85113	50.497
8.64845	57.0041	3535.52	13256.4	1914.07	1081.26	1556.38	22.9751	17.3529	3.05803	16.4182	2.08186	2.66594	18.8748	4.71621	51.3665	20.1202	79.3791	12.9922	96.4087	11.6567	bd	33.3955	360.066	0.462166	1.48679	nd	53.7399
8.6836	64.0324	2151.96	9373.9	2586.15	868.25	1157.78	27.0757	17.4024	4.12102	14.1873	6.96857	3.90828	21.5375	5.74413	57.0632	14.8395	75.1625	12.5537	89.9536	15.4244	0.200017	29.8417	365.942	0.374797	0.49648	1.64459	58.5094
8.71875	51.2464	2673.13	5862.74	2017.68	930.567	923.703	18.7396	30.7761	1.49764	9.67252	4.94963	3.2152	12.5158	3.47958	45.7064	15.2944	59.1718	9.47942	70.0394	13.7892	0.0470424	16.7481	298.327	1.16498	17.6535	nd	60.8435
8.75395	79.8848	3320.64	10585.1	2952.29	1115.1	1132.28	23.4621	46.8352	2.77461	21.9262	6.72586	2.77938	17.6383	3.74994	43.3564	16.776	58.9678	13.1877	83.1106	16.1157	0.128487	70.4413	357.406	1.27019	nd	nd	66.4702
8.7891	77.7401	2941.26	6727.23	3478.36	1127.39	960.93	20.0602	27.3186	2.35683	16.7531	2.74094	1.21274	15.406	3.90561	42.8304	18.3499	67.0262	10.8681	88.9707	15.1747	bd	27.1618	332.974	0.868335	nd	nd	61.4383
8.82425	51.5441	2052.35	10065.7	1607.69	632.646	886.018	11.9106	13.6954	2.03425	14.7762	3.81555	1.26755	12.9616	3.58574	33.8472	10.5094	44.6247	5.44708	51.7271	10.039	bd	20.4344	220.241	0.641174	nd	nd	60.1982
8.8594	63.5763	1836.02	9759.74	1967.66	781.708	1073.05	14.9323	32.623	3.8893	12.9191	7.58753	2.64591	9.68678	5.01569	45.4877	17.1177	60.4639	9.44146	62.8709	12.241	bd	20.2648	296.922	1.00591	0.953165	0.899222	45.6667
8.89455	62.4525	2176.32	7592.51	2502.12	876.566	1601.96	16.2959	6.81868	2.60052	10.9944	6.0761	2.59073	21.5039	3.2738	51.9334	13.5588	68.8879	9.16767	89.9642	11.9034	bd	17.0997	315.569	0.239647	0.397615	2.83186	64.6493
8.9297	62.4331	3878.47	10451.6	2695.61	1138.78	890.737	20.3823	35.3512	6.02602	11.8827	13.7947	2.15497	13.6709	6.29316	57.9484	16.2893	63.3692	13.1369	95.7716	15.8813	bd	31.0637	371.952	0.747449	0.485395	0.461206	69.9093
8.96485	79.6562	3077.12	7723.88	2578.72	1194.68	740.048	19.5392	32.0435	4.75553	14.4069	3.21501	1.89822	19.5796	5.06832	55.0398	18.4926	84.5971	13.2049	91.6069	11.4337	0.0764282	27.3986	374.881	0.781009	0.708437	0.832924	64.6032
9	64.0668	1713.34	15702.8	3213.05	911.567	841.568	20.3399	16.2371	2.83804	28.6567	3.82145	2.93227	14.3135	4.6315	43.1807	18.8773	78.7821	12.9858	100.241	18.5926	0.146006	33.3863	366.43	0.480498	nd	nd	48.2891
9.0352	65.301	4882.28	5931.97	2315.94	776.767	1431.58	19.5972	10.6485	2.50777	18.3273	2.4304	0.8973	10.8143	4.42115	44.6344	14.2015	44.5782	10.1901	76.3767	12.5667	bd	29.0732	272.192	0.336959	nd	nd	54.6961
9.07035	66.3238	2045.7	6386.33	2022.88	856.972	878.626	17.9106	1.84674	1.53823	10.8105	2.09441	0.825075	8.50715	3.7278	31.8407	13.9514	63.5156	10.4455	77.7048	10.5353	bd	25.7843	255.254	0.0718575	nd	nd	61.4257
9.1055	58.5107	2507.02	4335.99	1742.4	800.583	1119.61	14.3377	11.0108	2.07431	11.7752	3.76654	0.927834	7.64954	3.27568	34.5771	11.5511	53.439	9.82147	54.7005	9.54985	bd	18.667	228.457	0.456279	1.73059	nd	69.3077
9.14065	58.7914	1576.98	4668.22	2288.62	771.684	769.348	12.2863	21.3308	3.1645	10.0874	1.76753	0.347288	15.4714	3.14599	37.1478	11.7739	42.6348	7.9422	39.9511	10.6872	bd	40.2117	217.738	0.8039	0.738597	0.848851	65.5417
9.1758	70.5464	4040.25	7413.26	3287.98	1139.34	1314.05	16.8689	28.6381	1.68044	19.3241	6.46678	1.4839	19.5217	4.52968	42.75	14.6921	56.5204	8.94	66.0142	13.5442	bd	33.0795	300.974	1.13719	nd	nd	77.5474
9.21095	63.0487	2088.85	5237.27	2703.89	660.607	1678.96	8.21003	16.181	1.60014	9.84257	4.47526	2.50993	9.6409	2.49514	28.8486	10.4004	37.0966	6.89047	50.9811	7.83423	bd	17.9753	197.006	1.03998	5.28754	nd	63.5173
9.2461	73.339	2145.11	3548.67	3071.46	863.753	1119.4	11.0764	8.12818	2.91129	11.9692	2.93953	3.99284	13.2112	2.27991	43.4592	13.7344	60.6005	9.58701	64.1357	10.149	bd	32.6212	258.174	0.336322	0.405928	1.53586	62.8899
9.28125	63.4366	3209.69	4595.8	1964.98	712.479	869.373	18.2517	16.8553	2.50361	11.0014	1.7595	2.25314	9.35089	2.98981	39.9033	16.3615	61.782	9.44364	77.8358	10.7819	bd	30.1068	281.073	0.559211	1.08776	3.97299	43.5461
9.31645	39.7178	1384.42	5917.21	1532.87	479.242	594.718	8.96124	16.293	1.74852	7.00425	4.85925	0.661407	7.70403	1.35921	22.6136	9.09852	36.555	7.20348	53.4224	7.95736	0.10732	22.8815	185.441	0.958922	1.30604	1.88654	52.6725
9.3516	57.5479	2031.84	5968.79	2185.99	747.976	586.56	9.32462	18.5451	2.39858	8.77005	4.61518	1.96783	6.72307	1.7406	35.6173	11.2339	51.2337	6.2634	54.8922	8.9163	0.14722	35.5221	222.242	0.921502	0.968227	1.10758	66.582
9.38675	71.7027	3031.79	14179.6	3601.4	1136.26	838.785	20.1111	52.2971	1.75605	17.1311	6.0052	2.65921	12.6558	3.64106	39.4404	18.2754	61.0561	15.2382	95.3953	14.8852	0.143471	27.5249	360.547	1.80464	nd	nd	62.1744
9.4219	76.0505	5829.67	8303.34	2440.29	909.494	1348.51	15.4377	10.0984	2.69594	12.208	4.03206	2.04126	9.71479	1.88639	32.5709	15.5005	54.5227	6.90853	84.3589	10.6536	bd	36.3625	262.63	0.361488	0.6389	3.74124	58.675
9.45705	56.6915	3580.04	7163.96	1706.9	688.195	671.04	11.0534	3.22707	1.88126	9.90045	1.01024	0.896188	9.9634	2.39469	36.1884	13.9919	46.0314	9.12678	51.7749	10.782	bd	22.2496	208.222	0.163026	0.42094	nd	49.1854
9.4922	71.8531	3038.67	12077.3	2858.51	1039.62	928.108	10.5332	15.0473	3.7992	9.8013	1.41235	1.67192	5.30322	2.31761	37.5489	11.1217	47.4233	9.69654	88.0106	17.0574	bd	37.418	260.745	0.550502	0.373435	0.465674	93.4765
9.52735	76.6064	6144.02	12568.5	2364.22	862.565	1405.45	13.5008	22.3307	1.81926	9.49529	7.78057	2.52707	16.0314	2.35699	52.4782	16.4739	73.1715	9.76713	96.1435	16.7483	bd	33.0758	340.625	1.00782	2.93607	nd	52.3593
9.56255	77.7657	3712.59	7681.72	2100.14	921.969	832.184	16.1972	33.5908	2.34333	9.24633	3.55055	2.93445	15.9573	2.32359	39.4118	14.6032	56.9748	9.80245	68.1627	14.2475	bd	30.4092	289.346	1.23217	1.96883	2.42285	63.1349
9.5977	65.8249	3095.97	4106.92	2385.55	936.569	809.482	10.2576	18.6786	1.74889	18.2776	13.4603	3.09087	7.70565	1.45031	42.631	14.4722	54.4513	10.0693	92.4247	11.7273	0.0710879	47.4703	300.446	1.0161	nd	nd	64.7152
9.63285	92.6435	1657.07	6012.3	1746.29	889.718	513.488	11.056	6.91133	1.14912	6.81499	3.13115	2.13221	13.6988	4.3067	43.1606	15.1124	77.6895	12.0063	75.6345	10.6866	bd	15.3299	283.49	0.413681	2.45576	nd	58.8733
9.668	84.34	1670.24	6620.07	1551.16	1011.93	646.99	10.1212	10.0343	1.29473	6.71635	1.16819	2.05409	6.60704	3.42416	32.8072	18.0306	76.2753	14.7337	86.8444	19.2111	bd	17.0894	289.322	0.61488	1.82004	228.396	56.1227
9.70315	95.6466	1985.57	5286	1543.11	834.191	570.849	12.0219	9.3221	1.71923	4.63377	3.40469	1.98234	11.7074	2.34147	44.1048	10.6319	56.7146	13.8307	75.9737	19.2316	bd	24.9198	267.62	0.462648	0.525155	1.22856	78.4609
9.7383	93.4618	1841.97	5557.92	2075.56	1461.72	690.796	10.0403	bd	3.15631	4.40123	bd	1.9594	18.9604	4.58093	40.3002	19.684	83.1398	19.5	115.379	20.0496	bd	18.9579	341.151	0.415141	0.234859	0.367974	74.2593
9.77345	78.7959	1784.62	4106.3	1953.36	928.73	733.132	11.0538	9.6417	1.74433	9.40283	8.06407	0.9915	10.7965	2.23566	17.78	9.80624	67.3404	9.83583	89.8025	18.5296	bd	17.9026	267.025	0.50172	1.46852	nd	94.708
9.8086	93.8513	2364.71	6811.42	2158.89	1145.65	534.905	10.9763	9.28246	1.37758	8.16988	6.26439	0.706797	15.2468	2.88419	36.7797	15.3768	56.5381	11.6856	104.493	19.8294	bd	17.7913	299.611	0.527838	2.75129	nd	74.5051
9.8438	96.5853	2821.1	9683.14	3369.69	1268.65	848.589	14.4582	10.4586	5.05254	17.1126	8.74757	3.56936	22.932	5.51227	52.231	24.6618	90.0951	11.1416	110.936	22.3629	0.334218	21.7038	399.272	0.283941	0.239544	0.694292	51.4421
9.87895	83.9593	2079.24	4672.18	1831.38	1125.07	805.261	16.4446	12.2567	1.70918	12.6769	bd	1.33674	7.27797	6.97006	45.6332	20.2115	65.1962	16.4431	136.074	16.8427	bd	24.6222	359.073	0.493235	nd	nd	55.6648
9.9141	101.678	2381.95	4678.41	1727.04	925.968	765.289	13.579	9.11961	1.48064	10.9819	1.33593	2.34904	22.6923	2.93648	49.5855	14.726	80.7902	14.8565	78.8902	18.8532	bd	22.0654	322.177	0.43819	nd	nd	62.8797
9.94925	94.3857	1987.62	9026.62	1940.39	924.906	726.906	9.02621	12.5855	2.65989	7.41801	3.40821	1.65123	25.5631	5.377	49.2475	14.9294	49.5261	9.96223	110.568	16.4801	bd	19.8836	318.402	0.601947	0.468606	0.619329	61.9519
9.9844	104.034	1677.97	4295.28	2256.24	1040.46	771.808	13.0847	11.3927	0.954873	6.7866	bd	0.783483	18.2041	3.53436	56.6698	22.4473	86.2758	15.0072	59.339	19.2747	0.531942	20.6972	313.755	0.63074	nd	nd	46.3512
10.0196	75.5335	1808.62	4701.94	1506.29	833.296	1047.18	12.5309	11.356	1.94385	7.32859	2.56209	3.00145	10.8259	3.7363	38.3593	12.021	56.6152	13.884	89.4475	14.8601	bd	28.6775	278.472	0.524685	0.757878	1.98253	69.3202
10.0547	84.4038	1969.16	6807.01	2294.23	1142.24	1051.4	11.687	13.2138	2.38009	9.41027	2.8776	1.66784	14.867	4.72204	58.8849	17.36	80.4469	17.7278	99.4662	19.6761	bd	25.7864	354.388	0.585199	0.764562	1.73213	65.7968
10.0547	96.1658	1653.5	4916.17	2119.34	1170.44	679.892	12.7227	10.2861	1.25464	7.44078	1.29419	1.12182	23.2073	2.68791	46.0856	19.9754	80.347	12.4633	82.7204	15.5632	bd	24.5327	317.17	0.543097	3.3475	nd	58.594
10.0899	87.8646	3277.24	5188.84	2946.6	938.257	793.548	10.4425	9.36183	1.04115	3.08735	3.78576	1.46038	14.1916	3.3691	50.9305	20.8832	81.1779	11.3537	100.161	18.6138	0.120094	28.3013	329.86	0.60038	0.930095	1.97487	44.9288
10.125	90.7258	1376.71	2779.4	2475.91	1201.48	678.447	9.27892	11.045	1.16455	6.04105	4.23444	1.22408	8.92394	2.43818	20.0225	10.4247	55.6689	9.39595	66.4282	19.085	bd	19.753	225.375	0.742953	2.22731	232.796	115.254
10.1602	97.5112	1686.79	4128.14	1558.54	952.517	620.578	10.1861	11.1996	1.2784	12.3227	3.48344	1.68767	19.5928	2.39562	45.1249	16.9542	52.4679	11.6378	93.768	18.5436	bd	26.2229	300.643	0.686255	nd	nd	56.1818
10.1954	81.7691	1539.83	4815.17	1563.2	1090.72	498.729	7.99249	7.61295	2.3745	9.38818	1.14206	2.34867	16.1696	4.32459	33.2209	16.2276	77.6242	11.5228	92.8415	12.4733	0.109412	24.7954	295.263	0.409414	0.441527	1.18736	67.2134
10.2305	109.076	2719.29	11604.2	2986.54	1343.69	1378.68	17.0129	14.2267	1.44436	1.69959	2.08407	0.563715	15.7292	5.60119	49.1264	20.1654	114.885	20.5486	144.795	27.6209	bd	40.1624	435.503	0.584473	0.702478	1.28887	66.6334
10.2657	99.6094	2437.21	6599.99	3525.17	1460.77	722.738	12.7316	11.8647	1.1769	8.36459	6.84353	1.47198	19.2247	2.69559	59.6174	18.0958	96.3326	17.1335	116.8	20.0057	bd	32.5915	392.359	0.637168	nd	nd	80.724
10.3008	64.3238	1847.35	3787.45	2455.18	981.084	795.199	11.805	4.33363	2.00075	3.23124	3.9622	1.52844	9.90199	2.72488	44.7486	16.8732	74.4265	12.936	121.245	16.261	0.25264	25.2835	325.978	0.205334	0.167199	0.724503	58.1444
10.336	82.6607	1630.49	3499.8	1496.7	730.285	499.465	7.33921	8.83983	1.16231	4.31041	bd	bd	10.8905	2.81854	35.769	13.1026	52.1948	9.85963	84.5232	16.8597	bd	85.5826	247.67	0.69186	0.967789	1.86174	55.7359
10.3711	100.179	2094.61	4683.08	2229.29	1116.03	764.315	12.3818	7.19034	2.28773	5.65599	2.76593	0.372215	7.7829	3.52999	42.787	20.5642	104.588	15.4612	130.032	17.7304	bd	22.2962	373.129	0.313506	0.289206	0.873259	54.2705
10.4063	134.269	2027.09	5657.14	2549.83	1381.28	736.348	13.9415	7.90618	3.25608	12.0676	4.43339	2.14791	6.92816	5.20131	44.9149	16.0036	58.9229	13.8017	97.9168	22.7002	bd	30.139	310.142	0.275517	0.308761	1.26049	86.3101
10.4415	83.4226	1682.62	5450.95	1868.13	980.05	711.162	8.25078	7.6587	0.686063	10.177	1.23802	1.8114	14.0156	2.41974	43.4635	10.9174	42.3984	13.4848	110.963	17.928	bd	30.1911	285.413	0.65214	nd	nd	89.7696
10.4766	100.581	2097.9	6808.9	2463.65	1255.45	958.039	6.62523	10.9999	1.42789	4.84073	bd	1.27673	15.2955	4.13886	63.5343	17.8603	93.8027	20.4341	158.634	21.1483	bd	29.7754	420.019	0.837613	0.892295	1.12775	70.2924
10.5118	75.0906	1341.83	4385.27	1432.78	633.516	620.336	8.47228	8.08751	0.25551	1.51534	bd	1.07696	9.59998	1.91998	38.4831	11.8891	47.001	8.47898	60.3741	9.30231	bd	21.3798	206.456	0.795712	12.924	nd	53.2854
10.5469	131.839	2222.69	5088.6	2025.34	1179.56	851.539	14.6471	8.02562	2.21422	8.75447	4.02225	2.34191	15.0781	3.90396	36.7416	15.0081	52.7447	9.92477	92.5345	14.8721	bd	30.9074	280.813	0.320331	0.499154	2.33347	78.5952
10.5821	124.105	3620.86	7949.71	3097.63	1223.64	828.013	12.5704	8.12987	2.22493	9.22881	4.84764	2.82248	16.6692	3.72477	65.2163	23.0051	96.2128	15.0914	157.265	24.2294	0.464416	37.1234	441.238	0.355443	0.538237	2.35991	53.1901
10.6172	102.904	2238.98	7313.69	2465.88	1113.32	850.661	15.1214	14.0044	1.54744	5.73863	1.39619	1.21024	5.26877	3.23982	63.7258	18.2988	89.666	14.5663	99.9181	23.8171	bd	27.566	357.519	0.615636	1.15163	2.8812	60.8413
10.6524	92.8273	1857.95	4368.76	2201.22	1137.18	707.302	9.36943	8.68911	1.19765	3.55139	7.26758	0.390039	19.0522	4.05198	66.5401	21.372	74.8521	16.6983	100.185	23.3593	bd	31.307	356.576	0.575317	0.750461	1.54041	53.2089
10.6876	100.627	2409.48	6898.44	2929.68	1401.55	867.925	9.903	12.4096	0.941049	5.58101	1.69815	0.459328	14.4225	3.73267	67.2871	24.7521	100.884	17.1335	101.462	26.0501	0.327	37.1348	386.716	0.850433	5.38437	nd	56.6236
10.7227	126.54	2306.14	7346.53	2730.11	1252.3	949.266	19.5185	12.97	3.44363	4.37116	3.56741	2.06765	23.45	6.28842	71.2173	31.5246	109.236	17.2958	136.884	21.7795	0.341767	46.4958	463.613	0.365683	0.273003	0.634811	39.7246
10.7579	93.9644	1561.38	3644.41	1609.63	1042.95	457.859	6.5507	5.18054	1.96718	8.07757	4.40094	2.24582	13.3959	2.80136	35.0525	17.9259	58.4433	9.01424	77.392	17.4221	bd	26.8033	259.87	0.337954	0.382195	1.33797	58.1814
10.793	113.42	2418.43	5074.08	2435.78	1136.01	728.863	10.7769	8.4961	0.436024	9.06992	3.17086	bd	4.46115	3.27642	51.4286	20.8692	75.9783	15.0109	106.31	16.6479	bd	30.7738	325.932	0.634169	nd	nd	54.4349
10.8282	65.6984	1982.71	6332.63	1884.02	973.722	642.863	6.5507	3.95583	0.605171	6.2786	bd	2.24582	5.15383	2.53406	35.6011	11.7711	63.1204	12.5206	84.2238	10.7204	0.104621	21.561	245.281	0.412953	nd	nd	82.7216
10.8633	104.07	2265.99	4466.76	2570.27	1168.86	787.482	10.3931	8.77086	1.37447	4.65963	1.4178	1.22897	13.3824	3.11643	42.6664	18.7559	58.4199	15.767	101.464	21.5752	bd	29.1081	302.992	0.517535	0.739131	1.83787	62.3197
10.8985	71.8303	1133.91	3754.77	1268.76	790.315	699.708	4.69027	5.28116	0.433021	1.70922	bd	1.52566	7.86979	3.18403	19.87	14.8162	63.6176	8.8466	44.9084	14.0759	0.301685	28.3834	190.828	0.770117	1.67589	3.80094	53.3413
10.9336	75.1566	2037.5	6078.98	2150.5	886.213	631.169	7.56802	6.73461	0.786711	2.32706	2.85347	1.65385	18.757	3.64171	51.9794	23.9982	75.2143	13.1839	98.6323	18.815	bd	34.0622	326.146	0.588861	0.883842	1.88796	36.9283
10.9688	72.373	1403.6	12112.6	1978.8	1137.49	594.541	9.33488	4.68457	1.52275	6.31624	4.42733	bd	4.14572	2.14723	46.2846	12.649	75.8476	9.44674	87.779	15.6389	0.105248	33.1047	280.224	0.284975	0.453155	2.56059	89.9273
11.004	102.776	2235.99	12642.1	2212.01	1128.07	765.106	9.84667	5.23006	0.81921	7.76963	2.3759	2.43089	10.0392	2.59822	39.7227	15.6371	81.6089	15.7216	96.0918	21.4701	0.227617	30.1293	311.362	0.373113	nd	nd	72.1405
11.0391	108.004	1523.16	6585.46	2155.37	1261.94	725.183	9.74171	9.50141	0.942473	4.46934	2.73339	1.58425	23.0994	2.98916	47.7423	15.8244	95.346	14.3438	108.658	23.6994	bd	37.7667	360.675	0.65867	1.8871	9.89015	79.7465
11.0743	101.801	2259.09	8437.16	2054.3	1159.71	690.187	10.5031	10.0196	0.176923	4.22853	3.8856	0.348016	9.71058	4.55865	45.8163	17.3363	99.1606	19.0304	132.313	20.6845	bd	35.9344	377.772	0.834276	nd	nd	66.8951
11.1094	131.127	2669.08	5328.66	2085.74	1032.06	714.272	9.43068	8.52689	0.980703	15.1175	5.70269	2.07044	18.6965	3.2836	47.5533	12.9994	65.8846	17.5224	99.2989	20.3178	bd	42.4181	327.385	0.598251	nd	nd	79.3924
11.1446	107.046	3143.69	5150.23	2314.75	901.002	687.441	8.65916	7.39109	0.923602	6.56435	bd	0.360471	5.02905	3.09241	30.0751	13.2219	86.3007	11.7641	66.6603	15.7	bd	27.4653	255.742	0.560584	nd	nd	68.1448
11.1797	63.517	2123.37	3616.13	1778.26	757.841	603.137	7.0363	5.51671	0.438445	2.60025	1.05579	0.285578	7.96838	1.41878	19.0633	10.2158	53.6788	11.1362	96.0993	17.3627	bd	24.2519	233.876	0.587117	5.13752	nd	74.1833
11.2149	92.6416	2108.04	6373.88	2541.92	1096.02	778.157	10.136	4.59069	1.05257	8.33009	6.38723	1.47639	8.36622	2.32188	34.9605	11.796	71.8919	11.1871	119.753	23.4861	bd	52.8601	315.736	0.299795	nd	nd	92.9145
11.2501	83.3502	1819.68	4681.04	1851.92	795.055	527.852	7.34804	6.8145	0.312569	6.50189	bd	1.65465	7.46562	1.79513	26.6576	10.9424	76.2645	10.2426	69.9296	15.6816	bd	29.0917	241.611	0.740773	nd	nd	72.658
11.2852	102.031	2346.57	7033.56	2417.96	994.71	760.708	5.83638	6.87357	0.776677	4.60618	1.40153	0.379098	5.28892	2.39628	34.4387	13.7332	54.7521	15.2658	125.619	23.9082	bd	36.7164	295.276	0.720698	3.61353	nd	72.4313
11.3204	56.3123	1637.8	4614.56	1135.14	669.087	697.536	6.33541	4.31414	0.404911	3.20449	bd	1.1359	3.67946	1.7864	31.7866	5.97026	42.7893	8.38429	84.685	11.8451	bd	21.7059	206.321	0.507362	nd	nd	112.07
11.3555	109.814	2420.4	5894.85	2222.61	1113.17	762.22	6.06063	8.96484	1.04176	5.15541	bd	1.46123	7.09407	4.7496	35.2255	10.7532	53.6999	13.9487	91.5003	14.4684	bd	29.6999	254.123	0.822694	1.77822	10.0975	103.52
11.3907	122.524	3021.69	7408.38	3128.13	1379.34	1510.87	9.31874	8.29254	0.968702	4.30519	7.04462	bd	21.4429	2.34904	35.0669	16.9141	91.6767	12.225	144.525	20.3787	0.336609	39.7405	374.508	0.588861	1.41091	5.58879	81.55
11.4258	89.703	1446.9	3188.81	2441.71	1063.87	708.954	4.33144	4.31525	0.210288	5.02596	3.07381	bd	1.43199	2.24034	39.1138	10.4876	44.1917	10.6949	59.4882	17.8281	bd	24.6576	202.433	0.779977	nd	nd	101.441
11.461	71.8067	1433.76	2632.42	3143.58	1006.22	784.393	7.00653	5.57486	0.472056	6.53546	bd	bd	4.28961	1.38842	17.6693	11.1384	41.3666	7.94971	73.4468	13.8093	0.108901	22.8003	190.647	0.586443	nd	nd	90.3379
11.4962	84.9815	1228.65	3456.95	1725.45	706.12	513.174	10.285	6.30427	0.579771	4.30013	3.15955	0.282987	4.93751	1.9168	28.8612	6.91946	47.0288	11.6347	58.1486	10.5276	0.302693	18.4329	194.886	0.467795	nd	nd	102.048
11.5313	99.1544	2275.13	4061.18	2730.95	1154.61	925.612	8.34404	9.47725	1.79083	2.64859	bd	bd	7.62563	3.35586	64.024	22.7608	87.3391	13.152	75.2115	19.4307	bd	41.3127	315.16	0.57411	0.398328	0.55122	50.7281
11.5665	130.685	1504.03	4171.91	2736.3	1120.36	697.533	3.66137	6.33975	0.35729	4.24845	1.29268	1.50595	4.87816	3.9473	32.4135	16.1508	88.5549	13.191	79.9347	16.1807	bd	25.725	272.657	1.16656	nd	nd	69.3683
11.6016	67.6446	1355.61	3675.98	1772.83	796.175	789.154	7.5333	9.32164	0.507546	7.02681	3.69099	0.330586	5.768	2.98561	39.2296	11.526	69.3322	11.6295	100.206	17.8474	bd	36.9252	286.935	0.912014	nd	nd	69.0766
11.6368	68.3275	1471.42	3168.75	1660.39	692.862	471.711	6.93754	11.1615	0.261578	1.55132	0.946397	bd	6.24772	2.54356	27.5294	9.85282	48.6245	7.59463	62.4666	11.3809	bd	21.813	197.098	1.3064	17.4225	nd	70.3212
11.6719	111.514	1668.27	6555.16	2322.31	1065.25	578.863	6.81703	4.74539	0.999502	2.96384	2.41886	1.40195	9.08256	1.46988	26.5535	14.5925	59.2493	5.79455	58.52	11.5178	bd	23.2859	206.127	0.411582	0.4911	1.34296	72.9997
11.7071	93.6322	2039.89	5594.7	2737.28	1189.28	577.853	4.18095	7.56242	1.04235	2.05718	3.79011	2.20674	7.09807	2.14575	25.8066	15.3721	56.4143	12.23	91.5518	15.2463	0.120232	37.2248	246.705	0.851265	0.600506	0.547221	77.3659
11.7422	96.6608	2377.04	9376.54	2745.02	1472.76	979.536	7.21453	5.73318	0.968234	5.74223	2.80811	1.211	3.95078	1.8774	28.0261	13.0038	61.3101	8.64902	105.804	16.9721	bd	41.3286	263.271	0.48488	2.41771	nd	113.256
11.7774	103.322	2778.75	4881.2	1625.13	780.587	1126.17	8.7035	7.23198	0.923074	1.82178	1.11139	bd	5.24513	2.44293	25.6398	11.7069	63.0471	9.30155	97.3013	17.5942	bd	38.3038	252.071	0.546637	0.648473	1.28635	66.6776
11.8126	135.914	1807.21	6691.79	2923.95	1445.81	690.059	8.99305	8.55994	1.37713	14.006	1.42054	1.23135	12.0648	2.25493	52.0125	19.4876	92.7528	15.7975	126.335	22.1391	bd	51.1963	378.432	0.553781	nd	nd	74.1914
11.8477	122.681	1727.99	4421.03	2324.87	1103.82	549.329	8.23795	3.1714	1.39877	6.63315	6.09521	2.6771	8.57073	1.47838	36.9492	14.4628	48.6026	9.25584	75.0209	14.1175	bd	23.6566	236.672	0.215173	0.424407	5.63522	76.3215
11.8829	122.556	2522.35	5920.29	2574.79	1211.43	1503.01	5.2697	4.14294	1.09491	9.75102	5.3127	1.53578	2.48122	2.09261	34.38	14.5316	89.6022	9.82354	96.1685	24.1068	bd	31.0075	300.294	0.403279	nd	nd	83.3654
11.918	86.2608	1995.95	6459.54	2570.16	976.058	827.024	7.81428	5.49889	0.928667	8.80775	4.04673	1.16151	5.05663	1.63668	34.2725	11.1606	60.234	10.2929	96.8182	18.2532	bd	42.9103	265.983	0.447064	nd	nd	87.4559
11.9532	89.1287	2023.53	4207.86	1912.97	645.2	625.677	5.32161	6.28314	0.457367	0.898169	bd	0.954669	15.5932	0.940852	18.7794	8.0935	36.5373	6.69181	62.7461	10.1363	bd	18.884	173.433	0.82268	1.13481	1.58256	79.7183
11.9883	96.6987	2669.03	14763.4	3123.7	1256.85	700.949	6.92699	11.1743	1.9947	14.4644	bd	1.38632	6.03533	4.49413	44.1198	19.3934	83.0199	16.3201	145.573	22.9636	0.15322	51.9713	377.866	0.705056	nd	nd	64.8079
12.0235	99.6147	2166.43	10535.5	2422.87	1085.19	741.736	8.12054	4.0451	0.794404	2.34981	2.88138	0.38775	10.8193	2.27553	29.4775	13.6949	77.4865	12.1622	80.673	13.544	bd	31.0104	258.712	0.335369	0.525733	2.00618	79.2405
12.0587	93.3957	1781.74	5538.01	1802.2	903.998	646.489	7.30612	3.44172	0.31898	6.63524	bd	0.656268	8.7102	2.53676	34.7301	9.18749	46.9348	9.39374	68.1514	15.0117	bd	22.7857	213.014	0.374863	nd	nd	98.3945
12.0938	146.856	2234.22	10317.1	2786.04	981.11	1112.3	7.54504	9.30293	1.85909	2.74955	bd	1.45399	14.2462	2.66263	48.7929	14.7919	77.1994	16.7314	120.042	26.142	0.160698	36.2858	343.519	0.583655	0.376645	0.480135	66.3273
12.129	108.365	2830.52	7317.63	2872.81	1196.12	712.47	13.0965	5.6714	1.36	6.73026	bd	bd	9.26113	2.39884	36.9533	16.6455	83.2521	13.8923	114.905	30.545	bd	41.2216	334.711	0.286648	0.861718	16.7141	71.8583
12.1641	91.6912	1819.84	8534.09	2657.68	1089.45	1452.15	12.0165	12.1227	1.13016	7.82335	bd	0.77378	8.98294	2.82611	36.854	12.8325	72.093	12.1681	94.5393	14.527	bd	42.0755	288.689	0.686571	306.479	nd	84.8973
12.1993	90.3241	1174.63	2838.92	2087.7	826.111	523.198	6.08414	4.16227	0.842407	5.83142	bd	0.274347	13.401	2.22944	22.38	13.4176	51.5679	8.83696	62.7185	10.9529	bd	25.5334	202.699	0.412901	141.173	nd	61.5691
12.2344	81.906	1787.96	5013.24	1874.26	804.793	974.465	7.62686	7.83941	1.66988	2.9671	1.20474	0.685078	6.81379	4.4145	36.86	14.4608	50.9325	9.11576	57.7462	12.8617	bd	31.8456	215.198	0.514799	0.373751	0.587314	55.6533
12.2696	125.434	1979.59	4480.3	2415.88	941.591	767.058	4.60247	6.15841	0.695868	9.28815	1.25571	0.714062	5.92623	0.766878	23.2978	12.7649	55.773	7.77389	76.7745	12.327	bd	35.9611	218.119	0.782213	nd	nd	73.7639
12.3048	120.94	2271.95	5480.3	2537.52	1231.77	937.462	5.3207	6.52788	0.552754	3.27817	bd	1.94751	7.52814	1.94996	32.0445	9.94475	47.0112	7.93458	80.4543	15.6809	bd	35.8133	220.175	0.812017	4.82202	nd	123.862
12.3399	90.3481	2031.26	3737.08	2057.91	921.951	809.119	4.58197	5.25374	0.157619	8.47844	1.14624	0.651812	12.9766	2.38064	26.4437	10.3893	50.9109	9.32996	82.0303	12.2372	bd	20.2856	226.968	0.941724	nd	nd	88.7403
12.3751	87.4108	2365.67	4985.4	2379.06	976.031	598.741	8.78163	4.68104	0.561256	3.32859	4.08158	0.365569	6.37838	1.81618	34.5676	11.0909	56.4133	7.43735	79.8107	16.4187	0.129479	43.2798	235.733	0.39716	3.40542	nd	88.0029
12.4102	90.6775	1486.35	3714.71	1926.54	713.411	753.666	7.2805	5.49525	1.08625	2.75961	bd	1.30535	5.28807	2.19002	28.0958	11.1168	47.9712	9.8911	80.9594	14.5748	bd	26.1786	218.014	0.443421	0.47272	1.10912	64.1742
12.4454	98.1027	2069.45	6518.89	1355.11	699.256	853.118	6.87357	6.95498	0.922477	3.27817	2.6754	1.15377	16.3276	2.76446	26.0329	21.3591	85.482	17.8562	116.532	16.4972	bd	34.6601	324.71	0.617391	0.915499	1.99068	32.738
12.4805	63.9876	1603.96	4316.09	1954.71	649.86	639.163	2.93848	3.86548	bd	2.41426	0.980269	0.849713	3.69921	1.3173	20.6498	10.6865	42.4935	6.96701	73.5566	14.9172	bd	28.3046	185.335	1.22672	nd	nd	60.8113
12.5157	93.895	1701.37	3395.46	1667.94	708.469	570.06	3.85617	7.35985	1.02632	3.80609	1.86128	0.802681	3.49445	1.69658	25.0801	7.82516	44.5988	9.34301	82.9981	12.7269	bd	37.0929	206.476	0.869159	0.912528	1.10782	90.5373
12.5508	110.33	2699.95	6262.16	2617.57	1023.44	923.156	9.6228	11.7075	0.198548	1.17751	bd	0.821069	6.81431	1.7636	34.7612	13.2642	77.2729	12.7459	104.326	17.186	bd	35.5527	291.662	1.04933	24.0763	nd	77.1577
12.586	104.852	2111.61	8109.72	2038.69	970.937	1597.19	8.11968	7.24311	0.818433	7.2747	2.96853	2.16089	4.17649	1.98465	31.8457	13.7468	74.2967	12.1908	66.69	21.9298	bd	33.6921	255.446	0.595546	nd	nd	70.6303
12.6212	95.9331	2458.24	11399.3	2412.8	966.373	1248.2	8.98807	3.4615	1.53818	7.81547	1.58667	0.429174	8.97389	2.51862	54.1173	11.6599	69.6305	10.9142	77.157	17.1341	0.152006	43.0659	275.925	0.214577	0.498161	21.1778	82.8798
12.6563	125.918	2444.31	8438.84	2448.11	986.793	1058.3	9.26188	6.44727	1.81211	4.02678	3.28635	0.442248	4.62364	2.59535	27.8789	13.2167	51.6206	12.3714	94.2758	20.8654	bd	32.666	252.724	0.366701	0.310008	0.755442	74.6628
12.6915	72.2271	1833.5	3775.91	1917.41	669.64	619.01	2.69518	5.10316	0.185504	8.86725	9.51065	1.57159	15.2724	0.82387	29.0889	12.2273	54.1473	9.74279	85.2871	20.363	bd	40.8638	254.886	1.38927	nd	nd	54.7658
12.7266	70.9984	1912.3	5516.86	2155.76	942.931	711.483	6.55435	7.85272	0.622838	6.46188	1.12393	1.64447	9.5456	2.88314	31.0051	7.70786	49.9197	9.53552	57.001	13.6539	0.107675	30.7707	205.512	0.813091	nd	nd	122.334
12.7618	104.802	1610.75	3693.81	1977.94	930.721	532.408	5.46918	5.34775	1.26377	1.49453	2.75348	bd	7.74357	1.78204	21.4921	13.6252	49.2831	9.93099	55.1102	13.5383	bd	28.0489	188.834	0.477483	0.302099	0.474236	68.3089
12.7969	125.123	4343.29	10227.6	2146.1	905.994	1575.34	6.11321	9.71367	0.564391	13.3998	1.35907	0.772836	6.41401	1.66	40.899	10.3192	72.0051	16.5169	117.094	16.6775	bd	42.1312	313.508	1.08677	nd	nd	87.797
12.8321	111.857	1802.68	6169.5	3723.25	1196.31	1201.32	5.54582	3.24928	0.768824	5.70234	2.7886	1.20259	6.54755	1.86435	29.9154	13.2539	60.1404	15.2708	104.104	16.8542	0.132913	43.9906	267.208	0.353466	nd	nd	90.2612
12.8673	91.0187	1615.9	4122.79	1707.48	746.61	649.522	5.81569	4.84843	0.292373	1.73395	bd	0.916928	5.98279	1.67914	21.2204	8.5509	47.5503	8.85312	72.0214	13.3708	bd	31.0427	192.836	0.648993	6.771	nd	87.3136
12.9024	116.72	1967.57	4449.51	2692.15	1237.3	859.095	6.51178	5.0141	0.400129	5.95024	bd	0.823224	2.72475	3.18211	33.3978	15.6044	48.8026	9.7919	96.5606	19.0086	bd	34.963	247.772	0.578191	nd	nd	79.2918
12.9376	108.469	1375.3	3399.46	2177.48	897.81	589.162	4.52974	7.12276	0.490876	1.93759	1.18204	1.37705	7.80333	2.74289	20.1553	8.97506	55.0354	14.637	75.5524	16.1018	bd	33.1066	217.643	1.02786	1.99389	3.2382	100.034
12.9727	79.6976	2033.56	4588.35	3463	1493.33	728.666	6.37332	5.58721	0.588406	2.32256	5.71009	bd	5.34689	1.90404	21.3126	10.2385	65.9701	11.3703	76.7794	22.2564	bd	41.9152	235.76	0.599591	1.3048	3.80094	145.854
13.0079	66.2899	1104.73	3351.17	1309.99	663.452	545.943	3.46081	5.00869	0.375039	5.19229	2.72737	bd	4.26213	0.660969	27.6312	10.2873	52.6836	8.28325	85.3378	14.6298	bd	31.8365	220.54	0.94603	nd	nd	64.4921
13.043	68.7051	1355.64	4037.45	1691.17	867.615	804.294	7.33217	4.80211	0.870179	1.71739	1.04771	0.908168	12.852	1.40792	42.0405	10.2661	52.7063	13.9349	82.2549	16.586	bd	35.0362	248.726	0.416267	0.456766	1.14954	84.5124
13.0782	108.4	1833.86	4623.38	2328.26	970.861	582.813	6.88287	3.97415	0.476499	4.71613	4.62411	0.652484	8.65997	2.10224	24.7416	8.7122	50.9633	13.6812	78.1225	19.1503	bd	59.4315	227.46	0.423125	nd	nd	111.437
13.1134	95.2329	1756.71	3453.91	2339.73	677.882	497.832	3.95815	3.59559	0.921453	4.68189	3.83051	1.95472	7.17373	2.43826	21.4505	8.49853	55.9579	9.69924	75.2847	9.5645	bd	35.1542	209.01	0.44202	0.86379	15.5683	79.7646
13.1485	109.591	1753.51	3869.67	2273.45	984.51	628.775	5.51579	2.67296	1.03547	3.51039	bd	0.607386	9.07159	0.91246	bd	12.6898	64.5942	9.67408	98.7079	13.631	bd	43.2057	222.623	0.259861	0.298998	1.29471	77.5825
13.1837	94.8532	2253	5306.18	2190.44	1052.52	642.7	3.21056	3.00396	0.189342	2.25706	4.15835	0.372445	bd	1.68183	31.7659	11.9735	65.5858	16.1032	88.0096	19.2628	bd	47.2389	247.574	0.708121	nd	nd	87.9036
13.2188	78.9999	1071.75	2363.92	1245.07	577.173	474.493	1.10322	1.93993	0.113899	1.35774	bd	0.471014	3.12573	1.11308	8.72216	5.98531	28.8108	7.78738	59.8476	12.2992	bd	21.8297	132.677	1.16592	nd	nd	96.4315
13.254	89.0611	2769.29	4671	1979.48	690.354	564.601	3.18151	2.31011	0.360471	2.85278	0.868023	0.23479	5.73032	2.12045	19.1531	8.61197	52.9589	6.86602	67.5441	13.8481	bd	28.0703	186.641	0.468259	nd	nd	80.1622
13.2891	112.101	2244.89	3862.24	2165.87	750.5	1011.86	3.82221	2.3836	bd	2.69087	1.09258	0.29553	2.0564	1.33451	23.5591	11.6428	45.0195	11.2733	100.969	19.1737	bd	34.6437	225.313	0.581544	nd	nd	64.4604
13.3243	144.986	1951.61	5084.71	2379.77	926.837	658.798	4.86987	2.55127	0.160808	5.76031	1.16944	0.316318	8.82612	2.28569	28.7356	12.3183	81.9923	10.5918	98.3141	22.3896	bd	43.7121	280.281	0.432341	nd	nd	75.2406
13.3594	119.631	1870.38	5059.63	1603.07	775.517	599.916	1.78132	3.0547	0.538651	0.792688	3.91719	bd	7.33607	1.6619	20.9592	12.2635	37.4514	11.1443	116.849	18.9681	bd	38.4761	236.718	0.730071	0.426274	0.390462	63.2377
13.3946	104.208	1141.71	2874.94	1506.75	619.876	707.437	3.06562	2.88051	bd	1.77417	4.36187	bd	9.1925	0.924621	20.6251	6.09753	39.3879	6.948	69.1805	13.6809	bd	34.0644	178.119	0.876225	nd	nd	101.66
13.4298	103.997	2566.99	8555.97	2495.49	1021.31	592.292	7.02276	3.138	0.700336	1.37531	1.68642	0.95899	bd	1.64706	38.9058	10.1193	65.8817	13.1478	131.227	30.2169	bd	50.0213	306.027	0.299219	0.370134	1.36391	100.927
13.4649	123.096	2550.66	5758.11	2023.85	825.223	784.927	7.89462	4.20447	3.72351	5.19215	1.57983	2.31151	5.96174	2.12299	32.486	10.0611	72.7093	14.3087	122.932	25.0098	bd	76.9731	310.498	0.173849	0.0836941	0.245262	82.0213
13.5001	105.92	2902.6	36140.4	2701.7	1023.43	2740.84	3.70713	7.88684	1.45062	2.14544	bd	0.744276	4.93913	1.27829	35.4488	7.69463	56.0351	9.75315	94.5686	20.0781	bd	70.2684	245.73	0.78094	0.409224	0.302333	133.005
13.5352	92.5843	5651.21	11296.6	2313.02	809.706	808.301	5.01872	2.43691	bd	1.06803	bd	bd	1.22634	3.35954	18.3899	13.7952	46.9573	10.5096	113.747	18.3213	0.37891	42.8672	234.829	0.452804	nd	nd	58.6949
13.5704	105.798	1699.48	5873.3	2198.59	868.727	784.666	4.039	4.01825	2.05475	8.85653	bd	0.766201	6.35894	1.64575	20.2672	8.41557	49.0333	7.72261	105.784	18.1887	bd	43.148	237.151	0.308968	0.305868	0.97046	103.229
13.6055	133.352	2739.02	10787.4	3038.04	1142.2	1007.32	10.7362	4.26025	0.53974	bd	bd	bd	18.4321	2.86081	41.1363	17.4602	57.4774	12.3137	103.101	28.9964	bd	38.2477	297.314	0.308906	0.467436	1.68426	65.4172
13.6407	114.375	1863.39	7068.91	2989.53	1353.36	1021.13	5.27836	3.37284	0.798059	5.91917	1.44012	1.24832	5.43452	2.6385	25.2793	12.5229	62.4273	11.2275	85.0428	13.4293	0.137967	44.8706	236.059	0.373546	nd	nd	108.071
13.6759	101.066	1525.28	6333.86	1655.08	741.964	632.56	4.01134	2.62687	0.500032	2.9655	1.20409	1.04372	1.1275	1.02862	21.7411	7.81593	36.7249	8.55775	52.696	13.1508	bd	35.9992	155.194	0.409651	2.14501	nd	94.9297
13.711	110.621	1684.72	4576.63	1776.54	740.759	529.214	1.84311	3.27269	0.510672	bd	2.47172	0.332622	9.28104	1.05051	11.0957	13.4058	57.914	8.17639	52.9616	14.1848	bd	61.3683	176.501	0.791986	0.37952	0.3056	55.2566
13.7462	84.641	2539.07	5050.71	2295.7	824.524	752.484	6.56323	1.71724	0.779658	4.62386	bd	0.380553	5.30922	2.40547	33.1642	15.5085	73.0317	10.1608	96.769	22.4454	bd	51.3698	272.859	0.166247	0.899322	nd	53.166
13.7813	83.171	1772.55	5068.82	1762.2	728.324	730.576	3.04093	2.63599	1.62659	2.1378	1.30418	1.13049	2.45467	3.02632	24.8523	10.7025	55.1367	11.5127	68.8567	18.0847	0.124944	52.1385	206.503	0.260278	0.118404	0.211804	68.0519
13.8165	154.38	2800.86	8373.7	3250.5	1431.64	1165.17	2.02453	3.77428	0.56063	3.32488	4.07703	bd	11.4721	2.72575	27.4632	16.3965	82.4912	13.0209	87.3586	20.9068	0.390589	61.4419	275.596	0.831758	2.74882	nd	87.3136
13.8516	79.9474	2621.66	8487.9	2554.16	1075.18	739.896	3.68825	1.50178	0.510954	3.03028	1.23039	0.699664	2.31578	1.8025	20.9797	9.19271	61.8965	12.6952	77.7865	16.7604	bd	38.336	214.091	0.245707	1.20009	nd	116.96
13.8868	103.459	2540.45	7158.67	1493.34	585.115	493.58	2.5723	2.90505	bd	1.68755	6.21821	0.585431	5.8227	1.63421	18.0716	9.7089	58.9538	11.9218	67.2357	12.5068	bd	32.0769	199.824	1.05317	nd	nd	60.2658
13.922	144.065	2707.1	6709.78	2019.49	966.359	847.111	1.92388	3.21221	bd	1.0468	bd	0.347199	9.68776	0.783912	25.7498	8.647	65.9495	15.4524	113.262	23.9443	bd	42.1159	270.007	1.55701	nd	nd	111.757
13.9571	99.8461	1961.39	4267.12	1719.52	702.132	809.054	2.22494	2.2509	0.924956	2.74278	bd	0.633284	7.3519	1.22396	25.1326	9.27559	27.4122	8.17081	58.7975	16.5364	bd	36.9785	162.678	0.357819	0.25172	0.47364	75.6968
13.9923	104.623	1985.37	9435.07	3432.55	859.09	994.394	2.90635	3.71725	bd	4.09655	1.24647	bd	5.8826	1.52247	23.7525	9.15991	46.0218	10.2889	108.26	19.1212	bd	52.089	235.976	1.19272	nd	nd	93.788
14.0274	74.847	2277.59	24848.1	1831.96	567.61	726.986	2.01241	1.55267	bd	0.821454	bd	0.572792	6.64964	1.23032	25.7631	7.64813	29.6477	6.81312	52.4871	13.7212	bd	27.6566	148.92	0.719495	nd	nd	74.2155
14.0626	91.4991	2012.2	10817.2	2013.17	703.627	742.526	3.53379	3.51565	0.489557	3.87437	5.94147	bd	5.56356	1.58417	27.7886	6.78588	36.5875	8.24444	87.6382	15.1892	bd	38.958	206.736	0.600336	nd	nd	103.69
14.0977	90.6548	1575.94	10134.5	1484.29	653.349	478.273	2.53353	2.22613	0.394722	1.55805	1.9105	0.257099	1.78898	0.115175	10.4865	4.88946	26.9575	7.73669	60.753	11.3134	bd	22.5064	132.921	0.507883	0.774968	2.25236	133.624
14.1329	99.5399	1846.24	7542.46	2577.32	679.764	786.444	3.32808	1.92464	1.03702	1.01824	2.50966	0.710013	3.5309	2.28759	21.2901	9.48035	63.4814	11.7388	91.9528	20.38	bd	30.1548	234.67	0.242194	0.128031	0.334955	71.7023
14.168	111.708	2217.51	7115.4	2009.1	750.04	687.485	2.94476	1.33888	0.349069	6.22089	1.26294	bd	5.96035	1.23346	15.8307	7.57818	53.393	8.83243	97.4039	24.1798	0.365398	43.6263	226.528	0.289088	nd	nd	98.9736
14.2032	108.049	2002.25	5953.64	1360.21	580.89	553.675	3.06809	2.51115	0.478006	0.938699	bd	0.997748	6.51012	1.12418	24.2473	9.72683	47.4286	12.4053	95.9673	17.516	bd	46.4698	222.919	0.473091	0.433963	0.873008	59.7204
14.2384	115.363	3295.37	7618.33	2484.88	1036.94	639.453	2.65056	4.74545	0.218811	5.22967	bd	bd	1.49003	1.74884	23.9351	7.01615	79.1968	17.1495	131.561	26.1684	bd	53.8391	301.11	1.26007	nd	nd	147.793
14.2735	118.944	2355.33	4770.43	2492.14	791.671	3299.64	3.95492	1.25854	bd	1.94597	bd	0.321111	6.71433	1.45002	23.8151	10.6145	67.345	8.30241	78.3576	15.4419	0.113732	28.2036	219.521	0.296752	nd	nd	74.584
14.3087	110.189	2334.99	6624.43	1984.76	695.639	741.51	2.01823	1.64356	0.372179	2.20725	2.70657	bd	bd	0.657559	12.8265	7.75113	49.7171	9.41716	79.5175	17.8463	0.129003	31.8844	186.681	0.439996	1.80312	nd	89.7467
14.3438	130.096	3226.34	9171.33	2846.62	1256.32	1002.96	4.08234	2.137	0.483916	2.86992	1.75082	0.473576	4.95116	0.640701	21.0666	8.79159	74.9574	12.4435	136.238	22.3435	0.167733	56.8942	293.23	0.332838	1.80312	nd	142.9
14.379	111.563	4121.19	10869.2	4409.42	1731.95	1014.86	1.70665	2.50114	0.281777	1.67111	bd	bd	11.5896	1.75053	40.0778	12.5472	88.8282	13.8602	173.697	20.6198	bd	65.4589	369.131	0.828287	3.62427	nd	138.035
14.4141	86.0612	1701.28	5184.37	1849.1	678.532	447.513	1.9709	2.00114	0.147885	3.53451	1.07545	bd	4.05841	0.393555	11.8651	9.61578	42.0136	8.63029	91.9099	17.0253	0.103031	37.3194	194.242	0.730935	nd	nd	70.5645
14.4493	121.129	2387.61	5883.19	2560.05	969.242	1033.47	2.92502	3.66384	0.404661	bd	2.94279	0.832549	bd	2.86157	31.5695	12.9109	74.4371	12.756	95.6167	17.7861	bd	59.799	258.707	0.756223	0.536188	0.612045	75.0719
14.4845	98.7618	1986.65	5900.19	1740.68	924.573	715.191	2.55134	2.91208	0.302434	4.49743	1.09421	bd	bd	1.73692	14.8151	9.64925	40.9868	12.6711	69.9387	21.2183	bd	42.1931	182.374	0.725725	nd	nd	95.8181
14.5196	95.9993	1346.74	3753.15	1761.59	648.457	627.266	0.989012	2.00276	0.273875	0.808085	bd	bd	0.927861	1.45163	12.9184	6.79549	36.0595	8.29302	64.024	11.3082	bd	43.4384	145.852	0.903475	0.753612	0.706392	95.4247
14.5548	63.2289	1137.77	3284.97	1379.7	543.195	448.765	1.83377	1.26758	0.126215	0.748532	bd	0.248271	0.859481	0.223553	9.20417	3.14734	22.5928	5.8921	41.447	10.0247	bd	18.0497	97.6154	0.507183	4.10066	nd	172.588
14.5899	127.246	1841	6308.12	2697.66	710.363	890.823	3.8861	0.289094	bd	bd	bd	bd	2.7321	1.78187	24.8751	9.28883	32.7809	9.6999	97.2954	11.4541	bd	34.4193	194.083	0.0693729	nd	nd	76.475
14.6251	88.8664	1703.61	5141.75	2011.18	722.072	529.79	2.47388	2.37183	0.633293	1.87325	bd	bd	3.19481	1.39584	13.6715	7.48587	45.3212	11.8594	98.6256	12.703	bd	27.8448	201.61	0.445304	0.386685	0.766654	96.458
14.6602	100.369	2116.05	7648.2	2265.45	778.651	776.241	1.47036	1.17135	bd	3.62815	bd	0.859134	4.11836	1.79934	17.6236	11.4535	54.4743	13.0918	100.513	15.1095	0.283673	40.3007	225.313	0.742894	nd	nd	67.9834
14.6954	98.091	2117.1	5132.18	2806.23	788.082	823.965	2.70891	1.29351	bd	4.45622	bd	bd	bd	0.828068	25.063	8.21647	59.5728	13.6054	83.0969	17.2351	bd	38.5883	216.076	0.445286	nd	nd	95.9149
14.7306	103.202	1408.21	3644.07	3432.68	758.142	810.856	1.05626	0.804942	0.526673	1.03427	bd	bd	2.34607	2.47881	23.4426	6.59768	36.7204	9.67172	75.0768	15.0312	bd	36.3922	174.787	0.239849	0.126252	0.272781	114.91
14.7657	109.385	1965.83	6041.54	3472.85	1026.26	762.089	0.533261	1.01898	0.220768	5.27644	1.60547	2.84635	4.4883	1.76448	32.0958	12.4824	67.1041	12.6104	124.043	19.4227	bd	51.2522	285.513	0.677598	nd	nd	82.217
14.8009	93.1844	2335.08	5548.77	1866.21	772.395	598.077	1.66702	0.392769	0.172107	bd	bd	bd	1.13158	1.37556	24.3926	8.96483	45.611	11.123	87.1389	17.7537	0.119906	37.1962	199.723	0.156222	0.135148	0.820141	86.1583
14.836	99.9601	1433.1	4771.07	2594.39	944.566	608.244	2.05369	0.891051	bd	0.913894	bd	0.319416	3.13286	0.547236	30.8368	11.3208	51.6387	11.8868	112.286	14.2445	0.215792	42.6587	240.072	0.404606	nd	nd	83.4361
14.8712	88.2124	1640.61	3417.21	1762.97	694.908	509.061	1.68722	67.5955	0.174193	2.07647	2.54621	bd	bd	0.773633	22.7853	14.5051	66.5074	9.6605	56.5042	21.5453	bd	46.326	266.361	26.5638	nd	nd	47.9079
14.9063	99.2757	2102.11	5211.67	2273.01	839.299	985.784	1.93893	1.67072	0.321728	1.90805	bd	0.331783	bd	0.994389	19.7676	9.05012	39.9298	9.81129	90.7454	22.3701	bd	37.5262	198.84	0.486044	2.12033	nd	92.739
14.9415	95.0543	1582.57	5534.65	2934.09	778.194	568.883	0.612398	0.581965	bd	1.00074	bd	0.349769	6.90074	0.749418	11.604	10.8941	55.2301	8.37311	121.248	18.4607	0.355034	49.5151	236.005	0.886191	nd	nd	71.4325
14.9415	121.043	1906.79	4895.27	1344.39	649.164	608.686	1.89567	0.904903	bd	bd	1.13805	bd	1.02892	0.832926	13.0488	8.84823	54.8755	9.98319	65.7862	18.2384	bd	34.2699	176.581	0.445147	nd	nd	73.3665
14.9766	121.013	1944.53	5096.01	2081.93	789.714	652.359	1.33604	1.92125	bd	1.09163	bd	bd	2.47617	0.979682	8.62973	6.80096	34.4517	10.8214	84.8199	17.8374	0.38728	71.8364	171.166	1.34101	nd	nd	116.118
15.0118	111.647	1462.72	5291.84	2298.3	679.695	864.634	0.836366	1.60109	bd	bd	bd	1.10689	3.51099	0.305882	13.138	8.07263	46.4405	13.897	70.8586	12.8812	0.241838	47.5107	172.649	1.78518	nd	nd	84.1974
15.0469	89.7322	1139.89	4267.65	1528.19	428.832	465.458	1.81945	1.30712	0.125229	bd	1.8305	bd	3.40726	1.33416	13.6355	5.96552	27.3396	7.36234	91.8846	15.6011	0.0872469	37.1775	171.612	0.527121	0.618133	1.23021	71.8851
15.0821	135.062	2155.05	6250.16	1997.66	810.73	736.251	2.62275	0.768968	bd	bd	bd	1.42907	4.53291	1.92319	26.6496	5.26531	48.6914	10.9063	77.6148	18.2267	bd	34.2896	198.631	0.273411	nd	nd	153.976
15.1173	96.7385	2358.14	5599.32	3290.7	811.383	1088.3	3.98998	3.63677	0.331031	2.94971	bd	0.341377	11.266	0.58486	18.5341	7.25767	46.8559	12.2915	101.695	22.2809	0.230628	70.3178	232.015	0.640717	nd	nd	111.797
15.1524	105.819	2326.37	10292.8	3094.21	452.769	bd	1.18198	2.04084	0.589356	bd	bd	bd	1.31265	0.51934	16.3212	5.08259	38.0154	5.00398	68.1426	15.0306	0.136641	57.6694	153.24	0.543432	0.20507	0.169815	89.0824
15.1876	67.5949	4341.34	9222.95	2249.71	369.501	bd	2.57695	2.47364	0.267712	2.11869	bd	bd	1.80222	0.471816	8.03608	6.8288	28.3236	6.17252	61.4583	7.87819	bd	39.5773	128.409	0.635319	nd	nd	54.1093
15.2227	70.2784	1421.27	3460.4	3950.95	434.961	829.851	1.79862	1.26421	bd	bd	bd	bd	0.650829	0.351528	6.44558	2.59856	22.7682	5.3244	40.1144	10.8296	bd	29.1036	92.1458	0.655453	nd	nd	167.386
15.2579	107.474	3512.94	33214.6	3882.34	778.643	1307.23	2.79709	1.85455	0.357127	6.3645	2.59711	bd	9.71015	2.52543	14.815	6.88029	55.391	13.2604	91.7565	19.7558	0.24881	98.0782	228.065	0.411475	nd	nd	113.17
15.293	77.9139	3467	5920.17	2485.44	569.125	834.396	1.75779	1.4437	0.208367	0.614799	bd	bd	bd	0.183613	12.045	6.69277	40.7921	7.56456	75.5378	10.4156	0.0722233	40.3392	157.256	0.522211	0.714034	1.6502	85.0357
15.3282	100.489	1759.36	6381.47	4005.71	545.384	bd	1.97804	2.7746	0.125648	1.4978	0.913743	bd	1.6903	1.33862	9.55875	7.21635	43.5698	10.4258	92.192	16.6629	0.264367	40.9736	189.944	1.0464	nd	nd	75.5763
15.3634	100.008	1658.55	6745.69	2205.32	446.272	688.131	2.32221	2.92503	0.240799	1.42809	0.871218	bd	1.61163	0.744256	13.9198	6.45403	31.2867	6.34385	66.1062	13.748	bd	34.5367	148.002	0.834113	4.95979	nd	69.1463
15.3985	115.839	3122.45	17854.5	5320.84	717.081	bd	2.41518	6.38228	0.669916	6.95032	1.20888	bd	4.52287	0.884762	11.4315	11.1756	53.7611	11.436	85.0058	22.1936	bd	65.6399	218.038	1.17798	nd	nd	64.1647
15.4337	67.7081	2491.37	6072.41	2069.57	526.256	678.635	1.84668	2.00829	0.30693	bd	bd	bd	bd	1.08276	14.033	6.38019	27.3304	7.67002	50.4286	9.3039	bd	34.1899	120.391	0.613032	0.387488	0.509446	82.4828
15.4688	72.0607	1432.3	7299.1	1549.85	513.371	667.161	0.863842	1.28867	0.0792536	bd	1.74058	bd	1.61126	0.70397	10.6535	3.9161	36.7378	4.65939	49.3393	10.0144	0.110984	41.0655	121.608	1.02202	0.962927	0.922912	131.092
15.504	83.3866	1356.28	5044.03	3395.82	525.069	723.007	2.11564	2.5653	0.463335	1.64654	bd	bd	1.869	0.408291	11.0175	4.46134	22.5751	7.16822	71.6354	14.4891	bd	49.1642	140.415	0.607219	0.672297	1.21989	117.693
15.5391	100.13	2922.8	8513.4	4072.88	472.775	897.122	1.00232	5.03058	0.277713	0.545368	0.66874	0.390007	5.02561	0.734973	12.0286	6.42837	26.1626	5.48308	55.3869	10.7994	bd	59.0479	129.964	2.2386	1.49635	0.490898	73.545
15.5743	59.5691	1378.83	3941.57	2002.32	363.357	623.915	1.89424	0.946608	0.136623	0.810257	0.993551	0.583044	3.71472	0.543261	4.42596	2.4508	28.3338	4.56317	33.7265	8.58881	bd	32.7242	91.7113	0.362958	2.82902	nd	148.261
15.6095	64.4259	2422.24	6639.02	2270.78	426.601	630.222	1.11836	1.87939	bd	2.7573	bd	0.159554	3.14792	0.341863	9.50621	4.76356	28.492	4.97473	45.9727	8.62697	0.0536279	38.5157	111.741	1.56712	nd	nd	89.5552
15.6446	64.9765	1687.63	3754.33	1671.61	469.526	855.892	1.28961	0.950627	0.247393	bd	1.19741	0.8803	1.10201	0.872731	7.72542	5.43492	bd	6.38744	49.3399	10.1322	0.172358	35.6805	85.5599	0.391642	0.227559	0.441385	86.3906
15.6798	45.888	1767.28	5900.03	1747.28	429.198	365.165	0.682884	1.63911	0.0705024	bd	0.51271	bd	1.43334	0.437994	8.9645	4.61464	18.9591	5.20352	46.742	8.46813	bd	35.075	97.7284	1.5915	1.37682	0.820141	93.0081
15.7149	69.7238	2271.08	5053.7	1283.16	489.852	683.415	1.21513	1.90701	0.0911765	bd	2.67212	0.782092	4.9829	0.485282	6.9363	5.88648	37.6513	6.72939	78.8818	11.2773	0.12768	34.1734	159.498	1.12978	1.23863	1.12846	83.2164
15.7501	83.4603	2460.25	5186.12	2009.88	517.978	774.691	1.52702	2.0937	0.181011	1.07351	bd	bd	bd	0.399958	11.1217	7.01767	34.3835	7.17234	47.8698	9.61086	bd	47.1793	122.451	0.87178	4.72278	nd	73.8106
15.7852	64.3195	1511.04	7362.77	2471.47	367.348	637.524	2.1631	1.82731	0.14357	1.27931	bd	bd	0.960894	0.380172	4.1317	4.22977	25.8821	5.74785	54.2163	12.6608	bd	78.0204	113.623	0.624576	nd	nd	86.8482
15.8204	53.2608	1987.19	4228.96	1214.2	304.391	720.986	1.23027	1.69774	0.0634686	1.8971	bd	bd	0.417297	0.563759	2.51419	2.571	16.0804	3.89038	54.9101	9.09655	bd	44.5443	94.9323	1.06964	nd	nd	118.394
15.8555	92.828	4687.64	9830.21	1871.91	485.167	787.967	1.76084	5.19622	0.103845	0.615866	0.755185	bd	bd	0.82998	13.5835	6.61174	36.0093	9.82901	75.6688	13.8643	bd	75.208	164.829	2.23338	20.431	nd	73.3797
15.8907	108.03	3220.6	11912.9	2754.68	405.378	1001.29	2.24261	1.81192	0.588591	bd	0.708671	0.201994	3.98523	0.259333	11.3227	4.90211	33.4152	7.92314	61.653	11.0088	0.136464	39.3725	140.023	0.370566	0.182304	0.322615	82.6946
15.9259	84.5964	2508.86	9080.29	3969.56	524.859	1345.81	1.07937	2.07156	0.513428	1.5187	bd	bd	2.59012	0.904865	11.0839	5.04715	43.1894	7.49004	80.6031	16.4399	bd	47.5311	172.532	0.623042	0.416576	0.412589	103.991
15.961	63.1512	2483.83	6234.47	1432.81	346.923	476.626	2.21657	1.50672	0.230274	1.36567	0.554505	0.654053	1.02576	0.270781	6.6337	4.03978	38.3147	5.50035	50.9382	7.38916	bd	36.0541	120.64	0.449896	2.67163	nd	85.8768
15.9962	76.1145	2492.3	7360.17	1939.53	490.278	889.579	1.83475	2.09016	0.571705	bd	bd	bd	1.92433	0.672271	12.3811	5.18286	28.7706	6.03822	73.7561	11.2843	bd	46.2214	144.506	0.477101	0.21651	0.271738	94.596
16.0313	91.1116	3277.25	9380.66	5041.33	659.216	955.875	1.61425	2.16683	0.804897	3.185	0.969105	0.276226	4.54233	0.827879	20.8297	8.72241	38.9474	9.05759	82.9616	16.1253	bd	64.9991	191.03	0.422473	0.371141	0.709323	75.5772
16.0665	84.4025	5830.7	7532.15	2730.46	455.916	733.144	1.89033	2.19722	bd	0.487148	bd	bd	3.92416	0.145489	11.0416	2.88843	40.6347	5.17146	54.8739	12.5797	bd	35.7776	135.834	1.08393	nd	nd	157.842
16.1016	53.319	1893.73	3713.56	1872.89	287.831	390.711	1.16361	0.743152	0.128719	0.379794	bd	0.2716	0.861499	0.454838	9.31024	5.33259	23.9512	5.90147	44.0743	6.89164	0.0446161	29.0321	99.4646	0.414894	0.594984	1.76832	53.9759
16.1368	58.261	1364.07	4352.87	1135.48	318.717	541.709	1.41905	1.08908	bd	0.347375	bd	0.248417	1.19081	0.520275	10.0114	3.83382	14.3834	3.39465	55.7079	9.75455	0.0408077	39.8974	101.901	0.715697	nd	nd	83.1331
16.172	62.9567	1628.86	5183.29	2153.07	420.134	681.294	1.24292	1.44845	0.147334	0.873784	bd	0.151939	0.481941	0.716331	10.6567	4.667	24.2776	4.55426	41.1857	9.00078	bd	41.5558	99.4047	0.740963	4.01409	nd	90.0223
16.2071	58.5333	1330.09	3977.7	1693.21	410.058	681.342	1.25067	0.916448	0.183371	1.81491	bd	bd	1.23444	0.215627	5.28252	4.19041	20.8205	4.58234	37.8005	7.34729	bd	24.3237	85.639	0.433257	nd	nd	97.8563
16.2423	69.265	1808.87	5779.99	2239.72	396.328	532.414	1.5196	3.11335	0.252567	bd	bd	bd	1.12506	0.593991	10.0228	5.62247	34.5356	10.0781	70.6656	12.8827	0.0582659	44.3897	150.412	1.15491	0.729999	0.509446	70.49
16.2774	87.4671	2784.22	10378.9	2101.78	500.526	613.898	0.991459	2.14092	0.618257	0.607061	2.24805	bd	3.48905	1.00032	10.0272	7.70259	42.2697	9.00548	62.6884	14.8537	bd	35.8424	157.642	0.582854	0.238885	0.167374	64.9816
16.3126	70.1734	2786.86	4299.77	1909.27	369.336	448.251	1.28167	2.12364	0.677993	0.570344	bd	0.407867	1.95516	0.427112	6.26207	3.03937	22.4948	5.49325	61.812	9.83441	0.0670009	36.3752	116.38	0.501265	0.211092	0.190939	121.517
16.3477	100.508	1733.03	6593.47	2017.62	427.355	591.453	2.03264	1.62493	0.281594	1.11151	bd	0.193276	bd	0.414115	10.4934	6.68457	24.7109	6.6483	77.8431	12.3655	0.196186	32.0624	144.404	0.482396	0.792933	2.53303	63.9315
16.3829	67.8334	2135.83	6467.39	2711.98	417.427	434.789	1.95612	3.75926	0.813875	bd	1.31164	0.380569	1.8243	0.717186	10.0983	4.43389	23.4342	5.5752	88.0678	14.1425	bd	53.2916	156.515	0.679372	0.273537	0.203509	94.1446
16.4181	89.5249	4159.26	10198.6	2196.05	525.058	1539.84	1.15378	0.981382	bd	1.8959	1.54729	bd	0.695975	0.657613	12.2993	6.0795	23.1096	8.077	78.7397	11.6754	bd	37.9152	146.912	0.793196	nd	nd	86.3653
16.4532	84.4366	1649.69	7539.79	2936.5	461.081	1028.88	1.32613	2.5452	0.109475	bd	bd	bd	3.73157	0.291339	12.3201	8.43333	39.6686	11.1838	82.5415	13.6385	bd	55.5318	175.79	1.3508	1.37682	1.02568	54.6736
16.4884	78.4564	2920.04	13212.5	2340.48	701.48	973.731	1.63577	0.912444	1.02116	1.3421	2.47265	1.20987	6.15301	0.89985	8.56511	5.16239	38.1673	6.05589	87.7308	14.9308	bd	50.783	176.259	0.150445	0.0652847	0.181482	135.883
16.5235	58.9341	2041.54	8087.62	1620.36	339.422	513.256	0.539306	1.64072	0.29943	bd	bd	0.154011	2.02157	0.659972	7.27846	3.80392	27.2125	6.59885	50.7601	10.3176	bd	53.9388	111.286	0.890547	0.324497	0.152505	89.2295
16.5587	93.8257	2674.03	6557.03	2650.36	538.657	536.322	1.56718	2.00562	0.107866	3.22415	0.784427	0.223587	1.45108	1.05412	13.7154	7.4442	43.7023	8.05037	77.5071	10.0674	bd	60.9658	170.905	0.938994	nd	nd	72.3592
16.5938	78.5574	3239.69	5310.85	2747.3	524.868	551.013	1.12809	1.62291	0.375303	bd	bd	bd	1.89331	0.0820638	10.8206	6.26086	29.0328	6.7956	61.2706	13.2641	bd	39.2816	132.546	0.580844	0.256085	0.254512	83.8332
16.629	55.583	2331.75	6886.88	932.488	329.003	374.754	0.983698	0.725125	0.188708	bd	0.454412	0.129522	3.41493	0.110676	6.57771	2.36396	18.506	3.88233	47.429	10.6854	0.0435338	45.793	95.4514	0.391642	0.227559	0.441385	139.175
16.6641	65.171	2757.98	3586.77	1848.89	312.974	547.501	0.466333	0.969696	0.258914	1.15069	1.411	0.272479	3.51116	0.34195	6.99546	3.46117	30.5327	6.081	49.4125	10.0115	0.135177	33.8056	114.877	0.608692	0.617281	1.04638	90.4241
16.6993	75.5417	2205.9	4407.94	1637.87	321.977	726.726	0.536005	0.734179	bd	1.89105	bd	bd	2.58731	0.61827	5.96642	5.04242	19.2303	4.40527	41.6243	7.14716	bd	46.0017	89.7827	1.27731	nd	nd	63.8537
16.7345	64.3188	1854.98	11234.6	1932.12	460.878	956.976	1.45959	1.70094	0.259957	1.54171	bd	bd	1.75001	1.2235	6.54847	6.01737	31.1908	6.71185	52.717	11.2615	0.0599708	47.0221	122.383	0.638827	2.67163	nd	76.5912
16.7696	84.8505	2402.3	18878.2	3003.78	436.361	533.285	1.92596	2.01629	0.655368	2.5883	0.525467	0.306451	0.972042	0.769802	9.18756	5.69515	22.2447	4.66983	50.8266	9.25945	0.812001	52.7043	111.643	0.417282	0.423068	1.03305	76.6197
16.8048	78.7434	1514.52	bd	2751.35	527.537	1197.18	1.73371	1.56502	0.254194	1.50753	bd	0.174469	0.553406	0.522903	9.77982	6.33377	30.8273	6.42245	56.6553	13.7924	bd	50.3747	130.122	0.533733	2.51388	nd	83.2895
16.8399	80.9947	2357.04	11378.3	1762.61	403.158	506.443	0.636561	1.2215	0.0584016	0.696179	0.42471	bd	0.785655	0.103442	4.6563	2.46996	17.0687	4.60255	33.9964	6.702	0.0406883	42.4646	73.4224	1.31463	nd	nd	163.225
16.8751	74.5735	2557.45	bd	1946.94	350.363	707.881	2.31556	2.56523	0.0735159	0.87635	bd	bd	1.49461	0.261072	7.7388	5.7944	28.9284	6.83555	50.9684	9.35511	bd	49.654	117.207	0.918305	nd	nd	60.4657
16.9102	68.3169	1778.52	6427.93	2444.77	465.408	1147.21	1.44598	1.47406	0.300626	1.33607	bd	0.316376	2.02964	0.596214	9.48512	2.75624	27.3211	7.12295	54.7341	8.95992	0.0519715	53.9832	117.878	0.522773	0.80815	2.7944	168.856
16.9454	56.476	1282.47	7397.16	1368.48	278.039	624.526	3.0061	1.75909	bd	1.08376	bd	bd	0.397843	0.375914	4.82438	4.122	25.4592	4.26387	46.8445	8.83474	0.169893	54.5347	100.971	0.545695	nd	nd	67.4525
16.9806	65.9376	1433.83	9581.32	3359.88	396.55	526.026	1.75692	1.43301	0.292253	0.864471	0.527377	bd	0.476804	0.257533	8.16117	3.13109	27.4055	5.71514	62.0065	11.3006	0.101553	33.4168	123.328	0.459624	0.506252	1.17983	126.649
17.0157	89.4899	4301.02	12159.4	1444.79	509.336	765.655	1.10197	1.82589	0.416735	bd	bd	bd	2.24972	0.293636	4.78289	4.38076	24.166	6.92995	68.1925	13.0318	0.173973	41.1361	127.372	0.620849	0.259468	0.2239	116.267
17.0509	79.4164	3076.51	9888.75	3250.27	511.906	699.624	2.2303	1.34968	0.0969139	bd	1.41661	0.411025	1.30375	0.515819	9.13962	4.27081	30.9651	8.85003	72.58	12.0736	bd	83.8882	145.203	0.481894	0.824736	1.9486	119.862
17.086	73.8793	1244.13	9818	2402.27	447.138	827.248	1.70159	2.54243	0.0780568	0.462926	bd	bd	0.513212	0.484925	7.93163	3.71838	29.4981	7.90897	63.9801	12.3023	0.274085	45.4172	131.123	1.18021	13.2992	nd	120.251
17.1212	91.596	3264.61	8182.5	2442.66	469.671	948.019	1.13549	1.52419	0.566178	0.555925	1.37019	bd	1.90573	0.665772	8.84012	6.05186	35.0588	9.65441	53.6176	13.2673	0.197227	66.4348	134.214	0.422473	0.185713	0.209321	77.6077
17.1563	66.7626	1999.86	6955.5	2539.07	468.101	665.57	0.814853	1.0153	0.271091	bd	bd	0.431154	0.904936	0.65738	5.85233	3.74339	27.254	6.75967	67.0382	10.1216	0.0942001	39.7572	124.864	0.503067	0.221794	0.254512	125.047
17.1915	65.4467	2330.78	6091.84	2127.44	424.546	494.121	0.777067	1.07604	0.574617	0.849845	bd	bd	0.95907	0.37945	6.20242	3.26893	23.3346	6.09415	53.3918	11.8728	0.0496693	36.2046	108.781	0.33017	0.140949	0.159986	129.873
17.2267	93.3793	3726.16	9454.29	3366.4	601.239	713.254	1.20067	1.03458	0.199228	2.36897	bd	0.635294	2.69683	0.263776	13.6858	7.63548	37.4574	7.81137	77.7371	14.7376	bd	89.5016	167.464	0.486044	nd	nd	78.7428
17.2618	72.0543	2038.4	6556.08	1743.44	419.958	945.113	1.22978	0.451704	0.314813	3.26615	bd	0.331307	1.58816	0.415775	7.65238	4.41681	30.739	4.72306	45.0779	11.3357	bd	33.5324	111.543	0.1706	nd	nd	95.0816
17.297	61.7132	2352.6	7357.66	2259.51	314.203	998.037	0.524215	0.585306	0.363995	bd	bd	bd	9.89779	0.320753	7.0748	3.56862	32.3547	5.39009	43.1339	7.57847	0.151955	44.7577	110.793	0.278882	0.0952266	0.121944	88.0462
17.3321	76.8497	2738.63	9863.27	2541.84	381.772	703.042	1.14804	1.61036	0.293889	0.869309	bd	0.151161	0.981036	0.258975	7.14377	3.99313	23.3005	5.26054	51.2969	9.15023	bd	37.0338	105.458	0.651503	0.565739	0.766654	95.6073
17.3673	72.4387	3183.99	7388.47	2738.15	483.968	882.547	1.45545	0.694979	0.201354	1.7942	0.728502	0.42486	1.34763	0.266591	6.52296	5.03929	32.3979	8.31218	68.4377	10.6909	bd	43.0591	138.315	0.288281	nd	nd	96.0388
17.4024	62.4444	2350.83	6190.83	1840.43	346.586	547.755	0.26319	1.43301	0.0725194	bd	bd	bd	1.47435	0.38598	7.36895	5.2636	20.0668	5.53346	79.2404	12.2067	bd	42.2783	133.309	2.43554	1.17021	0.307298	65.8458
17.4376	68.3711	3043.82	8341.8	2161.85	417.053	839.318	0.408442	4.61366	bd	bd	bd	bd	4.02906	0.224439	6.10784	3.64133	23.0081	6.43517	52.5038	11.7867	bd	44.8128	112.759	10.5337	nd	nd	114.533
17.4727	64.7888	8580.19	7590.78	1887.19	427.764	888.468	0.58801	1.60079	0.162831	0.480441	bd	0.16792	0.532631	0.503273	5.86692	4.07518	36.2921	6.249	45.5175	10.3088	0.0564397	91.565	112.345	1.21461	1.01314	0.706392	104.968
17.5079	78.692	2369.02	7652.74	3259.7	382.974	709.992	0.665031	1.81047	bd	0.543372	bd	bd	3.123	0.48765	4.63031	3.95584	39.2636	9.58944	77.4167	15.0953	bd	49.1563	156.581	2.53871	nd	nd	96.8123
17.5431	77.344	2661.56	5277.55	2025.93	380.023	680.402	0.407062	8.31882	0.168944	bd	bd	bd	bd	0.522169	9.45901	4.52813	24.5653	5.22225	51.0504	11.5215	0.117703	45.6251	115.764	7.23557	2.91602	0.204015	83.9248
17.5782	54.8582	2874.32	7616.72	3297.14	411.889	802.394	1.39627	1.81835	0.0823443	bd	bd	bd	1.10775	0.658135	9.86853	4.28921	26.6309	7.72518	56.2556	10.1849	0.0573691	56.7515	120.017	0.985609	1.30772	1.43575	96.0292
17.6134	82.7717	3620.68	5807.54	3528.38	383.298	865.28	1.38124	1.67862	0.22957	bd	1.11115	bd	1.02262	0.809859	7.72432	3.28209	22.5132	6.1171	55.0064	12.1846	bd	47.0227	113.061	0.685067	0.43302	0.509446	116.785
17.6485	52.1636	1680.81	5686.78	2021.03	316.532	1743.62	0.82394	1.18535	0.136717	0.403392	bd	bd	5.58392	0.845724	2.94047	4.33069	23.8512	4.84978	46.1244	9.50609	bd	26.1949	100.582	0.81149	0.893497	1.17888	73.0904
17.6837	43.4548	887.425	3475.48	3958.49	249.008	4582.16	0.619192	0.235933	0.411995	0.30315	0.371727	bd	3.14511	0.181525	3.70192	2.98135	20.1141	4.88086	32.5957	7.09815	bd	29.7418	76.6407	0.0981729	0.0379372	0.148219	83.522
17.7188	64.0331	2446.14	6493.15	3454.17	393.889	bd	2.62185	2.51674	0.181284	1.07513	bd	bd	0.592994	0.560309	5.8728	4.45655	32.3294	8.46133	57.0612	10.0284	0.1263	75.7368	125.758	0.703623	5.66849	nd	88.3842
17.754	60.1358	2182.94	4796.17	3778.43	331.101	bd	1.41452	1.7357	0.261498	1.55085	bd	bd	bd	0.172681	5.4105	4.24714	24.2685	4.84277	42.6912	6.46153	bd	40.3991	93.0569	0.662287	2.71017	nd	77.9585
17.7892	47.9018	1619.18	6741.12	1822.27	310.67	1086.54	1.20342	1.81563	0.142653	0.420905	bd	0.608777	0.954752	0.252036	8.50555	3.82345	19.0852	5.88891	76.1124	13.2136	bd	46.7126	132.027	0.959281	1.31165	1.6502	81.2538
17.8243	68.0109	2068.23	7244.68	2572.73	482.799	1467.2	0.884206	0.633314	0.643576	4.91041	bd	bd	1.22805	0.324183	5.28045	6.05653	29.1674	9.85866	68.8282	12.0245	0.0635997	74.6633	139.84	0.172798	nd	nd	79.7155
17.8595	66.2959	2688.77	9032.73	2086.97	326.101	792.013	0.908506	2.32588	bd	bd	bd	0.353505	5.12852	0.370184	5.73195	3.89623	24.0389	6.5688	56.9436	10.4584	0.0580707	72.245	116.724	2.38739	nd	nd	83.6965
17.8946	71.1401	1573.92	8784.96	1949.38	355.35	bd	1.03457	1.48934	0.0712076	0.422305	bd	bd	1.44768	0.126124	6.71535	4.28025	23.8619	4.60203	56.9282	8.55283	0.0496102	38.4899	109.532	1.05625	8.54	nd	83.0208
17.9298	54.0453	1439.64	6258.13	2325.34	330.816	1362.32	0.857403	1.16613	bd	bd	bd	0.250284	1.19977	0.314096	2.76678	2.65326	21.8437	5.63495	45.3875	9.30094	0.0411145	26.8887	91.3749	1.26831	nd	nd	124.683
17.9649	68.2473	2668.53	10857.8	3819.11	449.585	960.615	1.30412	4.07355	0.08976	bd	bd	bd	1.20751	0.717405	9.12083	4.27588	30.4288	5.65112	51.3421	11.342	0.0625355	50.5266	119.553	2.29187	2.68758	1.23021	105.145
18.0001	68.7324	2565.61	4441.29	2368.8	370.959	1762.3	1.55261	0.704202	0.0674662	0.804234	bd	bd	0.907598	0.299634	4.63955	3.99516	19.9809	5.87921	59.393	9.3686	bd	29.6184	107.592	0.361176	nd	nd	92.8521
18.0353	58.4858	3642.99	7909.01	1895.14	253.064	579.368	0.507202	1.70611	0.140453	0.414416	bd	bd	0.459434	0.496302	6.3346	2.83061	18.791	5.15738	45.9739	11.2005	bd	41.059	94.012	1.50077	1.25183	0.706392	89.4025
18.0704	74.6068	2094.2	8134.54	3684.01	591.951	895.495	1.75147	0.771849	0.335993	1.32623	bd	bd	bd	0.296077	10.8987	5.00211	41.1812	6.91248	64.7638	17.3369	bd	51.6489	150.577	0.234136	0.315665	1.82926	118.34
18.1056	52.3765	2437.59	7413.56	1671.4	360.734	817.015	0.943079	0.903462	0.392383	bd	bd	bd	0.511877	bd	5.35389	3.91639	23.3608	6.26493	50.0398	10.3246	bd	46.6395	102.011	0.338659	0.136355	0.203509	92.1089
18.1407	55.312	1495.94	5170.6	1893.02	411.328	1924.09	1.06546	1.17944	0.341105	bd	bd	bd	bd	0.360221	4.16214	2.80197	17.9362	5.27721	50.3436	9.88158	0.0471522	38.7967	93.3489	0.4567	0.204766	0.264481	146.8
18.1759	54.3045	1764.32	7293.33	2462.04	384.653	757.082	0.843303	1.69975	0.13993	1.66387	bd	0.295255	1.41534	0.432493	5.55049	3.9362	18.721	4.20912	60.5818	9.91555	0.048502	65.7051	109.404	1.13694	nd	nd	97.722
18.211	69.8411	1783.28	6499.25	2338.97	324.287	579.618	0.960902	0.84466	bd	1.18455	bd	bd	0.434842	bd	4.30652	3.504	22.9337	4.6604	39.1687	9.00668	bd	45.0497	87.005	0.819723	nd	nd	92.5476
18.2462	73.7632	1300.17	10690.3	1587.81	337.423	599.061	0.876384	0.226794	0.397184	bd	bd	bd	1.33691	0.116473	3.56353	3.07388	22.8026	2.98901	47.5838	9.24907	0.0458141	34.7899	92.2156	0.0866783	0.0338152	0.186831	109.771
18.2813	69.4091	2812.17	7033.77	2362.58	338.145	532.633	0.934099	0.56803	0.282461	bd	2.05412	bd	bd	0.248905	4.31035	3.52582	13.9383	5.52366	42.2155	10.1708	0.14747	45.73	83.772	0.25889	0.119092	0.280014	95.9055
18.3165	64.2431	1279.63	7709.45	2678.37	390.108	622.438	0.717179	1.11756	bd	0.882635	bd	0.314027	3.53729	bd	9.68523	3.329	22.506	4.72345	61.4396	12.7941	bd	80.0237	121.046	1.45314	nd	nd	117.185
18.3517	65.6568	1756.04	4773.03	2038.77	482.493	485.21	0.647918	1.94465	bd	bd	bd	0.573788	1.82002	0.415567	6.55279	4.02086	23.1956	4.82535	43.6716	9.94601	0.0936736	27.6018	97.6141	2.79889	nd	nd	119.997
18.3868	73.5679	1939.35	9341.64	2204.23	397.716	1082.41	0.514853	3.16448	bd	bd	bd	0.1762	1.72819	0.603746	4.91706	3.97353	21.2055	5.21048	64.5217	9.67896	0.0592228	48.8748	115.695	5.73171	nd	nd	100.091
18.422	61.7045	2182.41	7775.17	1510.35	308.651	684.971	2.21272	5.69405	0.177941	0.349437	bd	bd	1.19788	0.261682	5.98716	3.75145	16.304	5.42977	47.1053	8.3921	bd	55.3735	96.8635	1.82269	2.64337	1.69135	82.2753
18.4571	70.4885	2399.49	5051.31	3388.04	457.756	735.108	0.719159	2.36866	0.0848845	0.503418	1.86424	bd	bd	0.451793	5.2202	3.51426	24.481	7.11424	68.7173	12.5453	0.0591388	54.3595	127.585	2.09703	11.3937	nd	130.257
18.4923	65.7814	2617.51	8767.4	2410.98	503.918	652.185	1.17891	0.469196	0.163096	1.4533	bd	bd	0.5335	0.14372	6.4694	3.43173	27.8237	5.10857	62.8176	11.4128	0.170726	41.4856	121.006	0.240279	nd	nd	146.841
18.5274	65.6031	1906	3351.76	2786.09	460.639	869.971	1.12771	1.24835	bd	0.424833	bd	bd	0.963662	0.190633	6.75553	2.58285	24.8397	5.58553	47.492	13.2729	0.100313	41.2274	104.484	1.03229	nd	nd	178.345
18.5626	85.4527	2301.08	9500.4	2577.57	432.013	858.479	1.84546	2.83412	0.101565	0.602344	bd	bd	bd	0.360682	4.76177	4.74762	31.6634	7.24168	95.5741	16.4613	0.142228	68.0736	166.194	1.17709	11.3937	nd	90.9956
18.5978	79.1418	2729.83	6195.84	2089.09	422.178	1223.98	1.93324	2.44215	bd	1.00139	bd	bd	1.1301	0.223558	7.61539	3.55283	34.6902	7.46083	63.7632	11.8155	bd	75.1789	135.628	1.17802	nd	nd	118.829
18.6329	66.0278	3261.53	10506.4	2406.74	402.98	750.773	1.13127	1.7754	0.170618	bd	1.86424	bd	0.558103	0.0748002	7.38492	3.7407	30.4272	7.60975	64.8555	14.2122	0.118869	49.0972	133.805	0.918288	0.616232	0.561421	107.729
18.6681	69.2188	1442.88	5349.63	1723.04	343.238	496.366	0.889599	1.5664	0.184913	1.46341	bd	0.392447	1.24482	0.21744	6.44544	2.15308	28.3827	5.28458	47.4017	9.43182	0.0857433	30.4616	105.058	0.903049	nd	nd	159.417
18.7032	58.5347	2341.78	6455.17	3281.4	429.911	505.434	1.125	1.89056	0.312051	1.85066	bd	bd	0.509104	0.206064	2.50153	4.30898	30.7712	8.233	63.4679	12.0661	bd	44.0314	127.242	0.749116	2.47374	nd	99.7709
18.7384	72.3777	2007.05	9759.69	2650.27	360.593	1158.06	1.04751	3.421	0.0864751	bd	bd	0.179247	2.35283	0.230129	5.31802	3.73364	23.9285	5.08394	72.193	12.2393	0.060247	70.7764	129.814	2.29851	2.34279	1.02568	96.5792
18.7735	61.6706	2002.48	4853.91	1487.29	279.049	447.112	0.964532	2.78121	0.200489	bd	0.482781	bd	1.34967	0.235756	2.62979	2.62999	19.6613	4.51224	38.6448	7.38161	0.0462516	33.6374	81.4742	1.47883	0.821516	0.407355	106.103
18.8087	66.7055	1565.64	5747.13	1686.41	312.325	412.597	0.999405	2.87914	0.604418	0.444736	bd	bd	0.493047	0.399129	5.70488	2.57005	16.0792	5.09696	59.9519	9.27522	0.0522452	41.3516	104.498	0.794624	0.31557	0.163071	121.525
18.8439	65.8191	2071.77	5842.56	1322	265.5	720.629	0.729268	1.75045	0.151335	0.446524	bd	bd	bd	0.133357	8.74818	2.51321	22.0049	4.36356	52.1991	10.1187	0.0524552	40.1353	103.159	1.23193	1.19201	0.942635	105.642
18.879	68.8998	1957.66	9138.16	2509.61	310.168	737.489	1.83144	1.14098	0.456594	1.35394	bd	bd	2.0568	0.335736	6.3033	3.12967	29.1572	5.51626	51.2622	10.4974	0.159054	38.3896	113.041	0.293201	0.258481	0.789792	99.1056
18.9142	53.2128	1447.91	7780.88	2157.14	344.293	401.645	1.11919	1.19985	0.164093	0.647709	bd	bd	0.357248	0.337557	5.52122	2.24952	27.9384	4.64466	33.5516	8.61223	0.0378554	34.3907	86.3433	0.633877	1.00476	2.39339	153.052
18.9493	55.9337	2102.75	9909.05	2292.12	317.44	779.491	1.85752	8.77133	0.0666538	1.9923	bd	0.138161	0.438239	0.71011	4.09906	2.5811	25.7085	5.41933	41.158	11.3386	0.234045	48.9237	104.279	3.85844	nd	nd	122.986
18.9845	67.8179	1876.28	7310.68	3631.55	347.115	520.524	0.802923	4.08931	0.267123	bd	bd	bd	0.891688	0.352791	5.28472	3.86599	26.855	6.4952	53.3237	9.73699	0.372208	40.9636	111.965	2.0563	0.906588	0.254512	89.7869
19.0196	87.0958	1795.52	9546.38	2283.82	417.677	528.496	1.81299	2.32073	0.167165	2.97911	bd	bd	0.546809	0.0732865	6.63079	3.07288	34.9921	8.63508	54.2964	11.1036	0.233507	38.7522	126.631	0.875798	nd	nd	135.923
19.0548	79.1437	1722.56	10662.6	3077.96	418.743	597.694	1.80199	2.30665	0.24964	2.47081	1.81544	bd	1.11203	0.293554	7.79561	2.833	23.1957	7.27248	43.1033	9.41221	bd	37.0003	103.663	0.772431	nd	nd	147.809
19.0899	76.2456	3439.08	10605	2545.28	343.829	669.818	2.27348	4.16945	0.0852947	8.15937	1.87325	0.176801	1.14744	0.226988	9.28725	3.60734	25.261	6.01035	40.1681	9.17903	0.179462	49.5308	111.625	1.49014	nd	nd	95.3137
19.1251	58.1204	1494.51	11779.7	2316.47	325.326	412.943	1.16527	1.51753	0.276947	2.46167	bd	0.142447	1.39713	0.244046	5.22802	3.76294	19.2838	5.41584	50.4231	9.29721	0.192949	74.7071	100.616	0.62741	nd	nd	86.4552
19.1603	78.7508	2719.86	12983.1	2747.05	378.023	1031.05	2.08877	2.00427	0.365778	3.25125	bd	bd	0.596759	0.0799811	6.5733	3.51474	31.123	8.06104	71.1849	12.4415	0.127102	48.2793	141.285	0.529667	nd	nd	107.554
19.1954	79.6951	2377.11	10418.1	2142.51	356.6	855.066	1.81249	4.2435	0.848088	2.2348	bd	bd	bd	0.747335	6.43018	3.20459	31.3338	6.74505	38.8341	14.1528	0.13094	47.1093	110.587	0.768215	0.477834	0.366688	111.278
19.2306	92.392	1973.79	9997.65	3598.38	561.48	830.182	3.80264	4.74882	0.316011	1.87414	3.06668	0.216899	1.40767	0.278469	6.8136	3.77291	24.8799	5.54101	56.6811	10.6071	0.220164	43.1773	124.007	0.877494	6.13582	nd	148.819
19.2657	68.6189	2594.68	8861.08	2925.83	460.532	640.346	1.21186	3.14181	0.604257	2.39106	bd	0.20737	0.657765	0.444313	7.24527	3.78479	35.8606	7.04957	54.6973	8.08708	0.210492	75.0978	125.383	0.815966	0.716824	0.709323	121.68
19.3009	79.5076	2313.49	11114.6	2207.33	355.152	741.66	2.97808	3.77562	0.593971	1.17226	bd	0.417072	1.32293	0.523407	6.04766	5.03465	28.3616	5.61722	52.2733	13.8316	0.0685129	56.3722	121.949	0.662274	0.526132	0.684026	70.5414
19.336	66.5525	6647.9	7066.99	2114.4	287.075	591.105	2.94403	2.29627	0.152639	bd	0.552252	bd	1.02159	0.26968	5.77715	2.19677	24.5597	4.21152	49.1939	bd	0.159779	41.3527	93.1755	0.604061	0.890899	1.63313	130.68
19.3712	84.095	3677.47	12782.6	2921.95	520.839	1178.44	1.80349	1.99642	0.230266	bd	1.67455	bd	bd	0.304871	8.71523	3.5184	27.6853	8.07258	64.9481	15.2949	0.241038	59.491	134.244	0.686991	0.513444	0.663175	148.033
19.4064	47.4938	1624.72	13357.8	1806.12	337.141	536.549	9.5068	3.9772	0.156121	2.78229	bd	bd	3.71066	0.620794	5.3414	3.00778	19.679	6.31518	55.4221	10.647	0.108769	36.9047	121.166	0.366438	nd	nd	112.09
19.4415	55.5011	2428.77	7952.48	1456.94	285.806	1047.92	1.62019	3.20911	0.252424	0.495706	bd	bd	1.12443	0.296827	5.44259	3.98168	29.3094	6.51734	57.9486	9.29378	bd	76.1951	119.492	1.14487	1.05019	0.873008	71.7802
19.4767	48.0864	1793.99	5881.62	1078.03	189.192	675.028	1.13301	1.34303	0.110563	0.655709	bd	0.471834	bd	0.146385	3.58176	2.17915	14.3653	3.41763	47.5892	5.62505	0.038323	25.4417	80.6186	0.798603	4.95979	nd	86.8191
19.5118	48.5996	1432.67	6073.09	1555.52	330.967	568.801	2.78391	5.94716	0.83601	0.76074	0.464096	bd	0.434577	0.7872	4.62805	3.04841	19.6945	4.80444	37.501	8.9827	0.0444615	38.4832	90.6728	0.912906	0.484887	0.341733	108.57
19.547	55.6538	1489.86	8388.44	1341.42	241.056	684.458	1.88343	6.59683	4.59075	3.98068	bd	0.119188	0.759895	0.290018	2.81116	2.20666	17.3495	2.37419	27.8532	6.37687	0.155876	29.7185	77.1924	0.308268	0.0972559	0.0416864	109.24
19.5821	57.9016	1415.66	11125.8	2201.8	376.542	623.435	2.60184	2.85814	0.309077	2.74725	bd	0.164651	4.20942	0.128282	3.04561	2.70691	17.997	5.77383	46.6162	9.1513	0.161366	47.3048	98.3095	0.697985	nd	nd	139.104
19.6173	65.8553	2169.33	7006.28	2897.22	337.551	582.932	1.74933	3.55137	1.94116	2.3986	bd	bd	1.65029	0.419199	5.23313	2.54663	27.5768	6.84479	43.0983	9.07383	0.225308	40.4238	106.083	0.352649	0.131827	0.100074	132.548
19.6525	108.694	2281.76	10295.5	3692.44	593.941	952.614	5.36986	5.691	bd	2.0354	bd	0.490388	bd	0.291228	8.24138	5.12427	24.4524	7.41851	69.6495	11.3285	0.638147	83.734	140.092	0.988303	nd	nd	115.907
19.6876	66.1618	1288.45	8825.65	2415.57	465.36	610.882	2.58986	3.823	0.769516	1.82458	bd	0.163892	3.66499	0.195636	4.70228	3.23864	22.6666	6.19288	53.3478	8.22347	0.106905	39.0261	111.403	0.634443	0.447002	0.52361	143.69
19.7228	74.4773	1901.22	8130.02	2633.42	470.793	923.512	2.99694	6.5569	1.11729	3.05513	1.87313	0.55297	3.50797	0.294475	12.4079	3.92186	21.6729	6.20792	43.221	11.3196	0.119435	41.3011	118.706	0.826806	0.573685	0.478751	120.043
19.7579	63.8574	1207.8	5363.84	2016.25	378.638	553.173	1.59963	3.51555	0.633798	1.50278	0.457254	0.271324	bd	0.217093	3.87295	2.83518	16.9557	4.41908	52.5207	10.3098	0.132294	44.8476	99.1108	0.800636	0.499075	0.392661	133.55
19.7931	57.7562	2021.22	6724.89	2098.66	386.076	614.956	2.0875	5.47355	0.394718	1.4027	bd	0.168135	3.75986	0.478822	5.1073	4.99663	31.4839	6.6148	63.0398	12.2822	1.21021	65.355	137.29	1.40174	1.68384	1.41291	77.2673
19.8282	81.9247	1550.23	7149.58	2280.49	521.375	691.908	2.84828	12.9294	0.284042	3.36909	0.683978	0.201919	1.28735	0.408445	4.0752	4.15706	29.3922	5.82634	56.2157	11.3067	bd	54.0706	132.986	3.03976	nd	nd	125.419
19.8634	82.8751	1871.73	4671.15	2540.83	523.279	631.504	0.875361	2.73633	0.0903742	1.61864	bd	0.38998	0.615418	bd	3.25869	2.38426	26.481	7.40675	48.9949	13.2046	0.0629635	45.5255	108.056	2.07266	nd	nd	219.472
19.8634	70.7661	2388.97	7504.63	1962.75	319.958	545.636	1.08756	1.68948	0.138858	0.409707	bd	0.148312	1.42071	0.300007	5.26233	3.23831	25.623	4.33664	37.1028	9.41517	0.145353	47.1323	90.1729	0.964076	1.25387	1.53207	98.8039
19.8985	77.3489	1458.64	7120.39	1741	356.524	643.423	0.826332	3.5753	0.206012	0.813172	0.997126	bd	1.87205	0.356352	4.6978	2.46854	18.9273	4.39612	49.0475	9.72316	0.191529	47.2848	97.9067	2.03628	2.38476	1.40755	144.427
19.9337	71.7411	2078.2	5646.01	2065.64	bd	502.362	2.15283	4.21649	0.530454	1.57296	bd	0.141291	0.448166	0.227231	2.13263	3.14374	24.9206	6.43699	49.3181	6.67823	bd	31.4923	101.92	0.927128	0.822212	0.79912	#VALUE!
19.9689	73.9263	2835.93	6265.8	1416.74	381.033	628.935	4.30781	10.7315	0.814551	7.24619	0.587659	0.173484	1.10606	0.422135	5.26978	4.00351	37.8343	6.08359	72.8071	10.8687	0.113161	36.9071	162.256	1.33177	nd	nd	95.1749
20.004	77.2151	2777.89	8242.42	2570.39	417.256	418.705	5.35815	18.2456	1.95022	3.29989	2.02319	0.197772	3.16169	0.236077	5.00119	3.90812	23.7682	6.62833	56.9258	13.3776	0.711767	40.8056	144.082	1.30524	0.732796	0.344768	106.767
20.0392	75.0578	1322.23	6894.86	2654.93	462.176	498.761	3.88898	23.5253	1.02127	4.03786	0.614305	0.18135	1.15621	0.516457	3.96869	2.53002	18.5052	6.14851	57.3204	8.94842	0.71152	35.1899	132.363	2.77366	3.17227	1.34328	182.676
20.0743	114.326	1939.91	7418.78	3403.98	436.465	587.302	3.58343	15.3986	1.49094	4.97204	bd	bd	3.80181	0.154608	5.69348	4.25036	34.2833	8.11506	65.0608	12.5974	0.714172	52.3432	159.402	1.51909	1.17791	0.566878	102.689
20.1095	95.0927	1740.36	7473.01	1937.78	376.135	583.604	5.0077	15.8222	1.70057	3.02163	bd	bd	2.89508	0.515729	6.11733	2.22543	24.7168	7.12466	44.4503	11.0447	0.710517	51.6896	124.642	1.26084	0.740728	0.378665	169.017
20.1446	76.0539	1814.22	6355.82	1968.76	378.52	618.928	3.29158	8.29231	0.472117	3.91659	0.681218	0.201104	2.57069	0.240054	5.76993	4.05671	22.7081	5.64638	42.7345	10.5084	0.4601	50.6279	111.09	1.50148	nd	nd	93.3071
20.1798	79.4383	2207.99	8177.39	2320.11	464.879	640.91	2.40483	7.92776	1.42925	2.82544	bd	bd	bd	0.577928	4.09571	2.66249	22.9149	6.48563	45.5154	11.8706	0.198887	32.6596	108.71	0.920504	0.45941	0.229783	174.603
20.215	70.7891	2215.07	5659.23	2012.42	382.631	744.921	3.49315	7.76708	0.36312	0.534374	3.95776	0.19344	0.61358	0.550887	5.22085	2.6183	30.2619	7.00914	58.8664	12.119	0.126178	57.1275	133.569	1.47138	1.60781	1.13583	146.137
20.2501	102.192	2853.55	9733.75	3160.77	543.612	932.532	1.95469	3.87566	1.01647	0.598047	bd	bd	bd	0.526779	5.10611	4.36708	27.5862	7.00303	59.2568	11.4025	0.0702554	50.2776	122.693	0.606789	0.246725	0.183589	124.48
20.2853	72.2867	1988.22	6311.84	2923.11	478.77	546.207	1.72583	1.96962	0.0890339	bd	bd	bd	bd	0.544344	5.80618	3.53882	24.0093	6.3318	48.2683	12.6109	0.0620297	48.8351	104.894	0.884607	1.31008	1.6413	135.291
20.3204	81.2369	2787.67	13535.6	2601.73	354.617	623.947	0.298014	1.91236	0.0821148	1.96258	bd	bd	bd	0.283516	5.65497	3.41033	15.1142	5.29182	55.3091	12.8044	bd	49.894	102.123	2.87045	nd	nd	103.983
20.3556	69.3579	1405.42	14654.1	1822.58	394.037	980.49	1.17261	1.65353	0.45497	0.382731	bd	bd	bd	0.337122	3.26774	2.96751	22.1774	4.96622	54.2321	11.5034	bd	34.3601	103.115	0.520289	0.244933	0.260324	132.784
20.3907	90.3811	2022.99	12583.8	4014.88	551.686	621.513	1.29192	2.48379	0.879232	1.73621	0.704958	bd	1.32684	0.8515	4.55436	3.68003	27.2745	6.65108	60.3928	11.6536	bd	42.495	123.481	0.487297	0.233872	0.200531	149.913
20.4259	68.0898	2144.5	11377	2933.31	588.08	835.891	1.93277	0.928308	bd	bd	0.82892	bd	bd	bd	6.18808	4.12476	31.1819	6.01487	77.9229	13.6009	0.0794126	82.349	142.723	0.447896	nd	nd	142.573
20.4611	83.9631	1798.63	10260.6	2128.79	384.27	724.84	0.270308	1.47473	0.224932	0.441718	1.0887	bd	1.01945	0.389079	4.3156	3.35842	27.3345	6.35299	41.1324	9.35323	0.1043	43.1606	96.7561	1.18986	0.541595	0.163452	114.42
20.4962	69.3779	1598.65	5865.06	2455.12	291.229	597.854	0.173228	0.417544	bd	bd	bd	0.309465	2.46133	0.183783	5.20082	3.48966	15.9901	4.74143	63.5292	10.8623	0.0499641	33.8229	107.359	2.24776	nd	nd	83.4547
20.5314	82.5355	1814.81	5975.99	2588.74	427.326	583.799	0.492219	1.60912	0.24543	bd	bd	bd	0.553409	0.569194	2.63343	2.79585	17.8032	4.96646	62.5405	11.3663	bd	41.5449	105.575	1.02891	0.388269	0.169815	152.843
20.5665	78.108	2069.44	10267.5	2315.39	530.092	492.018	0.45607	2.08327	0.379511	0.558495	0.684836	bd	0.641276	0.0737019	5.80057	3.57499	24.2971	6.0688	63.4299	16.0295	bd	50.8968	124.078	0.996219	0.412619	0.14189	148.278
20.6017	79.3955	2392.4	9588.17	2263.05	458.982	693.461	2.48784	1.47987	0.0977898	0.579954	bd	bd	0.665916	0.42467	1.38598	4.14858	30.5598	6.54698	66.8519	14.5503	0.0681299	59.4738	129.78	0.480375	6.179	nd	110.636
20.6368	66.4475	2223.28	9012.49	2303.18	376.199	752.84	0.743513	1.43046	bd	bd	bd	bd	bd	0.303003	3.16439	3.40985	27.4251	6.38771	57.7784	11.2552	0.0611415	37.7663	111.898	1.79412	nd	nd	110.327
20.672	62.4368	1025.56	5129.44	1649.26	242.275	342.15	0.832184	0.866791	0.288679	bd	bd	bd	0.783985	0.248739	4.15378	1.61331	15.8923	3.69121	38.8668	7.24355	0.120514	26.16	74.4813	0.410596	0.177816	0.244089	150.173
20.7071	62.1667	1795.06	4264.83	985.15	260.021	578.543	0.833771	1.09274	0.0625615	bd	0.914473	0.269964	bd	0.104643	4.9941	1.4278	14.6806	4.08397	42.1388	8.24728	bd	29.6851	78.8507	0.943484	1.03438	1.12846	182.113
20.7423	71.2622	1971.73	5879.1	1749.08	270.98	1164.2	1.52962	1.2256	0.070168	2.09734	bd	bd	2.88604	0.117366	2.27374	3.16395	16.192	4.40472	53.6432	10.7534	0.0488859	29.5929	98.3571	0.632894	nd	nd	85.6461
20.7775	79.0989	2877.44	11059.2	3088.77	351.589	493.323	1.05749	2.13495	0.0872989	0.517737	bd	0.187418	1.1949	bd	5.05831	3.62563	26.6008	6.71802	64.977	14.7817	bd	51.6905	126.941	1.4209	9.98545	nd	96.973
20.8126	52.9719	1656.99	2622.03	1507.68	224.893	299.75	0.288011	0.692492	bd	8.17894	bd	0.256622	bd	0.152401	3.87821	1.78117	18.8164	2.74136	37.6517	7.78655	bd	20.7178	82.2239	2.24218	nd	nd	126.262
20.8478	73.7689	2716.63	8239.61	2750.72	366.107	562.475	0.902692	1.73548	bd	bd	0.602271	bd	1.70317	0.0648163	6.00596	2.70139	22.6559	5.26797	46.1557	11.435	0.115975	30.1329	99.2304	1.79285	nd	nd	135.525
20.8829	78.6911	2354.92	7176.12	3397.58	354.698	788.967	0.720133	1.683	0.256698	bd	bd	0.182481	bd	0.369126	6.16416	3.4543	23.2527	4.27311	64.1258	12.9503	0.178841	41.6487	117.432	0.906844	0.388269	0.237539	102.683
20.9181	78.7811	2678.12	9113.53	2558.86	435.01	612.688	1.74895	5.38173	bd	0.570846	bd	bd	3.30351	0.246666	7.68366	4.94046	29.7046	5.88227	81.8568	13.8056	bd	61.0822	155.125	2.86951	nd	nd	88.0506
20.9532	62.7007	3215.54	12101.7	1778.84	273.774	450.007	0.327009	1.25843	bd	0.534374	0.655258	bd	2.47273	bd	2.91976	4.62481	26.0541	6.93389	64.7851	12.7624	bd	40.3769	123.328	3.58867	nd	nd	59.1968
20.9884	92.5241	1843.7	6464.18	2978.02	394.332	537.983	1.10768	6.27368	0.613812	1.21142	1.48546	0.218173	1.39098	0.802215	6.99853	4.85435	43.2305	8.75229	63.3123	15.7558	0.28533	64.0812	156.007	1.66013	0.845977	0.246195	81.2327
21.0236	106.807	3135.71	15543.1	3960.12	617.73	945.749	1.92245	5.42946	0.299516	0.588183	bd	bd	6.12556	0.0776198	5.02189	4.82594	37.9407	6.88752	77.8283	14.6681	0.138884	54.5123	161.615	1.63246	1.49744	0.873008	128.002
21.0587	62.833	1935.13	8767.05	2794.95	387.417	594.757	2.00848	5.18418	0.0872751	1.04037	0.634684	bd	0.594315	0.223656	4.41921	2.84678	23.535	7.66223	67.6049	13.6091	0.0608043	66.3608	129.45	2.05541	nd	nd	136.09
21.0939	62.669	1287.67	6369.01	1939.82	346.261	523.015	2.20153	3.72159	0.315769	1.12214	bd	bd	1.28846	0.104796	4.54357	4.72278	20.798	4.24688	40.2978	9.37762	0.131823	46.7036	92.7409	1.00752	1.43112	1.86264	73.3171
21.129	79.894	1290.36	6656.86	2309.87	452.989	651.408	2.90698	7.02932	0.732896	1.30223	1.06279	0.313747	1.49525	0.121615	3.15033	3.73191	22.1548	5.23147	47.5012	9.19493	0.15298	34.7082	105.929	1.13171	0.763583	0.510048	121.382
21.1642	80.8481	1795.12	6274.24	2945.38	523.464	843.177	1.21974	6.3562	0.42312	bd	bd	0.362269	2.3039	0.140423	5.17112	3.03799	26.2355	7.51074	71.8202	14.065	0.176638	56.0228	138.646	2.05423	0.889621	0.244089	172.306
21.1993	65.243	1641.8	5472.03	2878.45	410.197	588.768	2.92639	5.70667	0.486476	1.23589	bd	0.148141	3.31274	0.238247	4.75205	3.60334	26.6667	7.43941	63.2187	11.8689	0.145186	45.6912	131.604	1.09918	1.09614	0.995442	113.838
21.2345	92.2704	2159.84	8326.78	2433.15	558.975	622.958	5.07944	14.651	0.860879	11.6014	2.84517	0.166653	0.528612	0.268019	5.62948	3.36175	26.0713	5.58538	81.7134	13.8371	bd	69.6898	172.2	1.61334	nd	nd	166.275
21.2697	77.7995	2459.48	10807.1	1929.71	407.441	492.344	4.58845	16.8477	0.954548	6.17153	bd	0.184786	1.17812	0.220575	6.55647	3.19152	24.5529	7.34175	53.6236	17.8022	0.362199	60.1077	143.214	1.88241	15.3835	nd	127.664
21.3048	110.4	2095.17	10285.3	4307.78	576.573	900.137	4.80018	15.2198	0.86313	2.55945	bd	0.229902	2.93882	0.179121	5.03121	3.77967	31.7958	11.0991	98.1102	16.22	0.074608	50.9974	192.826	1.73126	1.82396	1.09505	152.546
21.34	94.373	1878.35	8927.84	2789.18	543.723	694.792	4.4369	26.0896	1.42656	6.46624	1.82791	0.539621	bd	0.21329	5.73177	4.49474	23.4175	9.80655	77.937	12.8295	0.116552	33.7179	175.217	2.42015	3.12516	2.04554	120.969
21.3751	93.753	4236.55	10673.4	2768.94	467.472	921.299	5.34356	23.9779	1.26939	6.90559	bd	0.680735	1.43711	0.455961	10.2956	5.01536	34.4446	9.04258	78.6797	16.559	0.220913	56.9265	194.107	2.16234	5.18475	nd	93.2081
21.4103	104.574	1592.11	8869.25	2335.02	573.225	784.135	6.0158	25.5414	3.87248	9.52204	1.36925	bd	1.92642	0.406796	3.71991	3.72325	34.3784	4.7092	63.5641	11.5123	0.526015	35.9622	170.261	1.12029	0.605081	0.249424	153.958
21.4454	85.915	2145.32	11726	2238.64	478.016	572.222	7.02815	43.341	2.5057	8.04756	2.27492	0.896188	1.4178	0.17326	6.38034	4.20956	27.9329	7.62606	82.3348	16.8919	0.36372	47.4865	211.06	2.39262	1.90752	0.62064	113.555
21.4806	52.1705	718.863	3572.71	1563.64	249.228	429.045	1.76246	5.34508	0.564033	4.01209	bd	0.241458	1.92044	0.441709	3.03777	1.92503	15.5255	4.21256	43.0611	10.4738	0.157106	23.1173	92.523	1.25147	nd	nd	129.467
21.5157	78.9555	2405.04	9537.89	2088.09	411.172	715.228	2.47002	8.95215	1.1065	3.27879	0.570286	0.168355	bd	0.270757	4.83032	3.04698	22.0641	7.99678	71.4483	13.3483	0.109816	37.7496	139.552	1.223	0.836425	0.439128	134.944
21.5509	64.2047	1939.86	9754.2	1409.09	285.956	404.716	4.13086	8.98871	0.813818	1.60704	0.652511	bd	3.07948	0.229938	3.88771	2.92673	18.96	6.08206	60.8854	10.3863	0.440711	30.5898	122.631	1.14284	0.914401	0.692725	97.705
21.5861	86.6582	2503.24	11193.2	3478.27	552.883	564.971	3.39846	9.17492	0.760671	3.22506	2.36964	bd	bd	0.276502	6.64598	2.46245	32.0359	8.21299	87.3953	19.6185	0.30294	48.8456	175.576	1.33833	1.83721	2.0442	224.525
21.6212	54.7106	1732.49	8574.73	1823.69	266.173	392.385	1.7385	8.84781	0.542423	1.07112	bd	0.12839	1.6412	0.365636	2.80971	1.95071	16.3602	3.15581	36.0475	10.6067	0.209993	28.3767	85.2657	2.12989	1.35041	0.437406	136.449
21.6564	63.003	2322.3	9457.88	1591.18	444.05	699.439	3.50999	8.33167	0.546853	3.24318	1.32342	bd	2.48465	bd	1.9415	2.95323	19.834	4.77766	57.7758	8.94441	bd	32.6827	115.666	1.37204	6.22086	nd	150.361
21.6915	105.136	3281.97	10345	4680.97	524.683	896.285	1.46211	6.32612	0.972851	2.8848	0.877766	0.259127	0.821935	0.20189	8.31227	3.07773	27.3826	8.08087	55.0644	14.6181	0.0840921	87.27	130.343	1.11478	0.672625	0.295927	170.477
21.7267	53.8465	1352.15	7609.56	1768.28	294.996	506.012	1.18869	5.2258	0.282513	1.67548	bd	0.1505	1.44167	0.366207	1.50327	2.5368	17.2673	5.16109	39.4204	9.30404	0.344324	25.5462	85.5238	2.11801	7.55272	nd	116.286
21.7618	74.9589	3644.93	11032	2717.13	390.167	736.582	1.90797	5.96167	1.19003	36.4905	bd	bd	bd	bd	3.18957	3.73668	27.6943	6.50768	44.4064	14.0298	0.0685764	36.6597	145.115	0.843267	nd	nd	104.415
21.797	114.846	3520.26	17071.7	4314.89	798.653	4083.36	2.5675	6.37947	1.06737	1.04804	2.58309	0.379383	2.41879	0.452864	7.01762	8.12599	55.9136	10.7995	98.4867	23.2959	0.743632	67.0311	220.536	0.878816	0.412313	0.251061	98.2838
21.8322	95.5092	2799.52	7495.59	3080.85	442.925	658.762	1.52258	4.65748	0.345023	1.36188	bd	0.245269	1.56374	0.496135	2.86727	2.70929	47.2637	6.98181	68.2848	14.9586	0.320768	53.4226	153.257	1.50764	1.85493	1.54858	163.484
21.8673	103.961	2999.07	10614.3	3573.01	535.048	545.146	2.57493	10.6302	0.755065	bd	0.909106	bd	0.851282	0.209099	4.05088	3.18762	32.7412	7.22207	86.7261	8.44471	bd	43.1202	158.302	1.78697	0.833737	0.288753	167.852
21.9025	60.2564	1273.73	4728.57	1926.26	282.602	678.849	1.21524	9.86967	0.673415	1.32905	bd	0.722861	1.52605	0.484177	4.02017	3.93512	44.8207	8.0221	76.7837	17.8827	0.15613	73.5687	171.285	2.38053	1.21308	0.246195	71.8153
21.9376	65.9823	2224.97	6218.39	3360.76	400.821	579.088	1.61482	2.93344	0.148893	bd	1.08278	bd	bd	0.123903	4.29215	2.35081	20.2645	4.71191	48.3951	7.84709	0.0516087	35.531	93.7653	1.24288	1.16674	0.918321	170.503
21.9728	64.7684	1690.98	6115.71	1553.01	319.612	427.631	0.77587	1.41693	0.0640502	1.14717	bd	bd	0.436161	0.221144	2.3095	2.71723	15.5268	4.28813	46.0522	6.72776	bd	28.3349	81.683	1.28532	nd	nd	117.624
22.0079	58.9531	1454.56	4982.17	1600.08	300.245	1246.7	1.33737	2.65704	0.296617	0.436506	0.535252	0.158013	bd	0.384489	1.84722	3.12245	24.7196	5.41874	51.0615	10.2942	0.0512784	29.6906	102.269	0.989111	0.673333	0.532353	96.1568
22.0431	75.2917	987.297	7149.59	1558.09	296.515	654.596	0.742083	1.07002	0.0766142	2.7444	bd	bd	1.57559	0.196336	3.04244	3.31791	14.1017	5.0653	58.5714	8.18443	0.107288	39.5169	98.6882	0.956063	nd	nd	89.3678
22.0783	72.8314	1570.69	7029.65	2563.27	537.014	1052.35	0.807718	1.39729	bd	0.794855	bd	bd	bd	0.170877	3.61995	4.37312	24.2115	5.35344	49.9672	9.92132	0.37443	34.1248	100.617	1.61321	nd	nd	122.799
22.1134	66.1076	1674.33	4806.97	2037.84	422.086	602.778	0.720365	5.08093	0.0660903	0.391957	0.480624	0.285191	0.450053	0.228188	2.86359	2.68585	24.2552	5.85752	54.8704	13.0791	0.0460449	36.0226	111.315	4.83216	31.3903	nd	157.152
22.1486	82.5862	1678.07	8531.42	2194.46	319.48	885.642	0.762959	2.11017	0.317441	bd	0.57283	0.169107	1.07815	0.271966	5.13681	3.83291	26.4551	4.55065	67.7849	14.3225	0.221161	42.8888	127.366	0.977725	0.393663	0.203509	83.352
22.1837	79.091	2186.66	5442.29	2688	389.146	bd	0.332036	1.83667	0.276298	bd	bd	bd	2.81992	0.175697	3.47158	1.9311	15.0193	4.24712	57.615	9.77223	0.0960093	34.5766	97.497	1.20639	0.393663	0.101754	201.515
22.2189	76.815	2261.7	8060.83	3699.74	501.205	1401.03	4.63769	1.84839	bd	0.553636	bd	0.40283	0.635697	0.0730607	4.0448	2.87925	33.1686	8.50759	72.7846	14.4732	0.196415	50.5069	144.009	0.371668	nd	nd	174.075
22.254	55.9882	844.514	5000.01	1081.08	218.754	539.314	1.18939	1.74836	bd	0.68834	bd	bd	0.393217	0.0965853	2.08212	1.42088	16.697	5.26246	50.2758	7.92136	0.24299	21.1094	87.7755	1.37079	nd	nd	153.956
22.2892	83.5377	1837.82	10800.3	2634.17	434.857	3137.14	1.35301	3.66495	0.101522	1.2102	bd	bd	0.691332	0.440878	5.88243	2.49812	28.9599	11.1148	89.9334	15.2862	0.0707302	48.8119	161.137	1.94999	nd	nd	174.074
22.3243	64.1026	1629.3	6038.26	1668.98	259.279	1048.46	0.497874	1.51741	0.0685923	bd	bd	bd	1.41061	0.236827	3.7238	2.05439	19.5664	5.50702	55.9063	9.40954	bd	19.0227	99.8988	1.84272	1.31008	0.614597	126.207
22.3595	69.4725	1894.6	4534.43	1987.94	346.844	704.301	0.290923	1.11956	bd	1.43572	4.10979	bd	1.0972	bd	2.59755	2.4724	18.8105	4.16309	55.2059	10.1375	0.168661	30.5908	101.44	3.58867	nd	nd	140.286
22.3947	58.9069	2646.95	9655.77	2884.07	335.137	347.219	1.69255	2.16936	0.281313	4.45265	bd	0.199979	bd	bd	4.03605	2.209	14.9703	3.05158	38.2623	8.6204	0.19599	35.6544	79.9454	0.7225	nd	nd	151.714
22.4298	74.4958	1473.99	13076.9	1959.09	337.834	669.447	0.874577	16.831	0.455078	2.15804	1.31983	0.585415	bd	0.151029	3.25577	4.71507	26.8092	6.12049	63.0978	13.2735	0.0629071	41.031	139.647	5.88707	6.92308	1.83886	71.6499
22.465	94.8106	1857.24	9671.95	2178.8	481.569	1095.15	1.88355	2.45737	0.335468	0.658785	0.807813	bd	3.04842	0.778008	5.62468	2.73335	33.8477	6.78844	66.9558	16.9242	0.311884	58.4427	142.844	0.715181	0.605107	0.763679	176.183
22.5001	92.7833	2515.32	14011.6	2900.47	417.816	1009.17	1.10282	3.88866	0.509941	1.20611	bd	0.436604	1.38488	0.618597	3.27863	3.75164	24.9219	7.95513	56.8955	15.0546	0.212883	57.8766	121.005	1.1659	0.685242	0.335763	111.369
22.5353	73.7802	2905.09	14192	2928.24	443	1880.08	0.857798	3.65507	0.408031	6.0527	bd	0.217365	6.25348	0.0792406	6.23648	2.22039	33.6101	9.39548	75.8721	13.2567	0.0705395	34.5179	158.115	1.38326	nd	nd	199.514
22.5704	56.6409	1906.52	7235.03	1498.82	292.932	545.28	0.328125	1.02531	0.273043	0.807649	bd	bd	bd	0.233928	2.19547	1.9688	21.173	5.10069	37.4167	9.47604	0.190229	26.2436	79.9988	0.681486	0.387705	0.235848	148.787
22.6056	77.4647	1747	17432.1	2433.91	527.111	745.42	0.776906	1.0678	0.739106	bd	bd	bd	3.14723	0.153383	2.30144	2.82831	19.3772	7.89759	47.8577	17.0007	0.128414	33.3647	103.147	0.270106	0.0855568	0.0890035	186.369
22.6408	76.3389	1837.05	9699.46	3205.79	429.013	731.432	1.27654	1.0231	0.0878616	0.521074	bd	bd	1.80689	0.146962	4.76991	4.74487	29.1663	6.68795	35.6454	10.7194	bd	48.3934	96.5963	0.588055	4.75453	nd	90.4163
22.6759	69.2982	1558.52	5188.89	2208.32	448.532	1122.61	0.263554	0.676157	0.0726198	bd	bd	bd	0.494517	0.121467	4.47307	2.17502	20.1491	5.77033	51.4824	11.0642	0.050594	44.1247	96.7425	1.14761	0.551397	0.307298	206.22
22.7111	90.5221	2329.64	6645.98	2488.79	461.092	599.548	0.831065	2.29853	0.518238	0.508853	bd	0.184202	bd	bd	4.0311	2.87524	21.1341	5.74433	68.634	10.8507	0.120152	48.9332	117.61	0.746534	0.305969	0.167374	160.366
22.7462	67.2488	3545.31	6655.27	2473.39	350.099	492.379	0.667843	15.1143	0.0920088	bd	1.34491	0.796043	bd	bd	5.33121	3.08327	19.0837	6.62021	60.1108	9.82899	0.128846	46.5076	122.073	13.6833	9.72811	0.614597	113.548
22.7814	58.5465	1614.41	3901.28	1763.24	371.507	626.512	1.09492	3.24726	bd	0.898352	0.548047	bd	0.513188	0.0589807	2.71737	1.8544	18.2689	4.54257	43.9032	11.0784	0.0525042	50.5062	88.7257	2.76565	nd	nd	200.338
22.8165	77.6894	1359.8	4868.55	2080.52	359.745	798.789	3.119	0.817372	0.235593	0.462652	bd	bd	bd	0.338776	3.0979	1.91958	21.0368	4.11657	56.4847	9.79651	0.21903	28.1157	101.425	0.188369	0.286596	1.80068	187.408
22.8517	64.4066	2379.73	6601.76	2164.07	381.89	732.489	0.273161	1.66506	0.151286	bd	1.10019	0.161587	0.512542	bd	4.36114	1.24838	16.4885	4.91336	36.2415	10.3252	0.0524382	43.8755	77.4419	1.78735	0.651781	0.152885	305.909
22.8869	79.3283	1483.61	5095.88	2639.93	333.068	607.782	0.48891	0.375797	0.0807218	0.47873	bd	bd	1.66006	0.278706	3.49755	2.56171	25.5406	6.95207	54.7752	12.6593	0.11304	26.3174	109.349	0.434423	1.90087	nd	130.018
22.922	93.2648	2488	6300.74	1840.02	380.084	591.893	0.888934	3.99387	0.987097	4.38694	bd	bd	bd	bd	3.52107	5.08627	20.1548	5.84994	68.8672	11.9904	0.0853236	76.3817	125.727	0.780007	0.666863	0.523191	74.7275
22.9572	147.578	3800.67	22956	7703.31	821.514	1215.99	bd	40.9574	0.169001	1.00228	bd	bd	1.15084	bd	6.71124	7.922	44.9149	12.0188	123.223	19.1097	0.236663	109.187	257.179	57.4082	98.9536	0	103.7
22.9923	59.4267	1725.41	4412.03	1218.77	233.355	561.311	0.434085	1.32299	0.120206	0.354675	bd	0.258065	0.407246	bd	3.0282	2.43038	16.3602	4.10324	33.3297	7.34976	bd	27.2107	69.4987	1.35978	1.13423	0.706392	96.0158
23.0275	73.0153	2835.33	4792.46	1747.6	314.714	489.277	0.27207	0.698006	bd	0.89364	1.0958	0.160941	0.510496	0.0586713	2.977	2.04465	26.3438	7.08181	54.2803	12.1581	0.315462	26.6746	108.575	2.39245	nd	nd	153.92
23.0626	35.4273	1249.05	5245.99	1659.37	229.204	412.458	0.351826	1.07228	0.244294	1.15848	0.352493	bd	bd	0.167355	2.10018	1.32201	18.7318	3.77053	33.8721	9.85185	0.0337697	20.9982	72.9951	0.761255	0.821623	1.378	173.375
23.0978	88.4574	3454.17	9371.2	2840.71	444.726	497.844	0.214551	0.619758	bd	bd	bd	0.383288	0.604858	bd	3.20277	4.00514	33.9798	9.50202	82.7251	14.5642	0.061883	32.5214	149.802	2.69374	nd	nd	111.039
23.1329	77.3338	2395.47	12182.2	2333.1	378.76	711.759	0.312021	0.40025	bd	1.02486	bd	bd	bd	0.0672866	3.72514	3.03446	19.8395	5.18227	73.985	12.7154	0.120395	35.7658	120.286	1.19622	nd	nd	124.82
23.1681	75.1518	2841.99	5571.86	2575.37	472.341	670.985	0.63422	1.22034	0.175627	bd	bd	bd	0.595006	0.14615	2.83137	2.92804	24.9248	6.86993	77.4026	19.5542	0.122359	32.9431	137.282	0.858474	0.41149	0.305769	161.316
23.2033	45.6768	1611.16	6451.82	2277.65	344.478	548.64	0.169769	1.30963	0.141271	0.837822	bd	bd	bd	0.11756	0.99614	1.66674	10.1995	5.9363	35.9727	10.2692	0.197335	26.4182	67.6167	1.6824	3.78517	nd	206.677
23.2384	70.6911	2269.74	7008.42	2517.83	344.385	416.969	0.559538	1.25652	0.388522	bd	1.1268	0.165496	1.05513	bd	1.93469	1.34735	11.1869	3.29662	47.2455	8.99224	bd	41.7072	78.5553	0.560904	0.191525	0.121944	255.602
23.2736	69.8763	2281.62	6566.31	3980.78	400.302	1252.34	1.38622	1.21119	0.209069	1.23991	bd	0.223303	bd	0.266553	4.13053	3.67118	21.5738	3.66722	67.4278	12.969	bd	71.6801	117.976	0.511244	2.36544	nd	109.039
23.3087	79.8973	1893.25	7687.31	1946.37	311.633	1191.81	0.500221	1.24984	bd	2.46862	bd	bd	bd	0.211648	3.88021	2.91499	27.738	5.25343	46.0283	9.19183	bd	33.6476	99.4371	2.33	nd	nd	106.907
23.3439	72.6073	1740.18	21201.1	2470.66	329.078	1290.31	0.37019	0.800897	0.770499	bd	bd	bd	bd	bd	2.7562	2.153	22.1026	5.56372	37.5755	11.3734	0.107041	69.8542	83.4659	0.219445	0.0615568	0.0406816	152.846
23.379	92.3497	2223.74	36332.5	5373.41	373.229	bd	0.773446	0.620403	0.214181	bd	bd	bd	bd	bd	3.45293	3.28656	29.1503	5.53399	77.1546	14.9987	bd	64.3181	135.185	0.357875	0.171539	0.305769	113.562
23.4142	69.426	1794.55	10162	2519.37	342.38	695.397	0.184636	1.33512	0.0764384	2.28477	1.67875	0.164102	1.04625	0.0598235	3.03546	3.24278	24.1853	8.17712	75.8247	12.4652	0.160828	41.8822	133.76	2.56419	nd	-0.0431004	105.582
23.4494	92.3172	3944.08	9867.76	2008.64	439.944	996.613	0.834222	1.60384	0.385742	0.912353	1.11874	bd	bd	0.0599	4.71431	3.11036	23.3212	6.27264	63.5429	14.5998	0.161034	46.3281	120.476	0.63569	0.373619	0.335763	141.445
23.4845	94.5198	1927.69	7965.5	2426.07	366.08	660.134	0.404133	3.73069	0.0667247	0.395719	bd	bd	0.454373	0.0522211	1.91839	1.7014	16.6954	3.52101	36.1737	5.87731	0.14039	22.4805	70.991	5.21738	22.8293	nd	215.164
23.5197	87.129	1596.08	8790.72	4570.68	407.117	685.445	1.22937	4.4665	0.226707	0.668911	bd	bd	bd	0.389425	4.88699	3.37813	24.2688	7.64538	85.0913	16.1772	0.396044	51.5134	148.429	1.96298	2.03036	1.06076	120.515
23.5548	95.7817	2034.64	9309.21	3843.08	560.285	872.018	0.411496	1.58356	0.227901	0.672436	bd	bd	2.33176	0.290564	6.15548	4.30434	33.2231	7.02379	72.9277	13.8332	bd	58.5478	142.985	1.12841	0.716076	0.353196	130.167
23.59	68.7014	4046.12	12262.7	3253.08	435.672	800.183	0.443389	6.97197	0.368959	0.724554	bd	bd	bd	0.20435	4.40523	3.11523	28.6687	7.97528	92.7878	15.9963	0.171085	86.6498	161.662	3.42934	1.56096	0.163452	139.852
23.6251	54.3092	1640.35	8538.59	4200.03	296.497	1024.57	0.696262	0.669303	bd	3.43609	bd	bd	2.25531	0.0643184	4.46156	1.65635	13.5247	5.4334	45.3853	7.38573	bd	35.6962	84.9683	0.896426	nd	nd	179.007
23.6603	52.6098	2405.32	4869.83	2071.43	302.611	485.119	0.33457	7.56474	bd	1.23732	bd	bd	bd	bd	2.99328	3.66914	20.781	6.58376	56.6562	12.129	0.145353	18.8819	111.949	21.0849	nd	nd	82.4748
23.6955	69.1457	2794.04	6782.01	2157.84	381.851	871.384	0.112676	0.873003	2.26808	bd	bd	bd	2.57308	0.240278	5.77529	3.55941	34.0449	5.88576	69.7868	18.0531	bd	66.8761	143.172	0.0900414	0.0227944	0.00420647	107.279
23.7306	62.2	1710.9	3416.69	1715.95	297.63	666.529	0.713165	1.24623	bd	bd	1.17524	bd	1.46853	0.137133	2.9051	2.07919	21.097	3.80559	52.2726	10.0643	bd	27.5706	96.964	1.62957	nd	nd	143.147
23.7658	52.4918	1935.89	5547.01	1419.38	284.565	339.496	0.370367	1.06926	0.0510255	0.302613	bd	bd	bd	0.221587	2.5837	2.20975	17.7319	4.47973	39.267	9.141	0.0714541	24.1529	77.4279	1.74554	8.55626	nd	128.777
23.8009	53.6207	1587.93	5667.68	1509.29	210.482	486.8	0.114448	0.88287	bd	bd	bd	bd	bd	0.0792518	3.08986	1.71458	16.0978	3.25088	34.0671	8.40341	bd	21.3681	67.7002	7.19371	nd	nd	122.76
23.8361	46.7547	1830.87	6989.92	1842.28	290.971	486.234	0.493959	0.664201	bd	1.94921	bd	bd	bd	0.0638282	3.83163	2.58817	16.5976	6.48035	53.6941	14.829	0.0568194	41.2709	101.192	1.25393	nd	nd	112.423
23.8712	61.9497	1925.86	5378.44	1976.71	230.151	596.721	0.932133	2.41384	0.238618	0.705822	bd	bd	bd	bd	3.21447	2.08983	20.1169	3.86522	32.1	8.0167	0.0829162	38.5941	73.6936	1.20277	1.04444	0.766654	110.129
23.9064	77.6752	3260.06	9551.01	3022.51	433.212	3035.31	0.213793	0.51532	0.356692	bd	bd	0.381933	1.21147	0.226819	5.12844	2.72989	21.4561	5.85174	55.1415	12.6948	bd	65.163	105.908	0.297007	0.0855568	0.050751	158.692
23.9415	57.3396	2419.27	19436.7	2274.44	330.732	995.847	0.742083	0.802739	0.0766142	0.45437	bd	bd	bd	0.0599611	1.6429	2.15795	10.8196	5.00132	43.4699	7.97967	bd	59.7961	73.207	0.717245	4.27813	nd	153.262
23.9767	55.28	1225.94	4943.29	2035.79	221.924	652.712	1.04383	8.65751	0.0538505	1.60961	bd	bd	1.84819	0.185928	3.12022	2.86009	14.3117	2.48233	30.8265	6.9064	bd	21.3217	73.9061	6.42876	nd	nd	77.5935
24.0119	62.1134	1558.46	5443.49	1622.15	289.642	867.82	0.349747	0.420464	0.218096	0.860869	bd	0.15504	0.988469	0.120794	2.60399	1.13337	13.5711	4.95493	41.3405	9.06896	0.151947	28.6356	75.7864	0.324496	0.264915	0.562741	255.559
24.047	53.7559	1478.54	5576.9	1197.67	180.589	347.289	0.254716	0.40863	bd	bd	bd	bd	bd	0.179859	3.81025	3.28993	14.0099	3.64498	42.6597	7.62305	bd	37.4089	75.881	1.49602	nd	nd	54.8914
24.0822	75.6135	3493.66	11947.9	2907.89	441.78	779.754	0.384679	1.7277	0.105995	0.628614	bd	0.457385	bd	bd	7.29949	3.36375	34.7725	8.24525	54.7866	16.1491	0.0738462	40.9952	127.921	2.00903	6.6554	nd	131.336
24.1173	56.5481	1335.25	4690.63	1272.3	251.126	463.119	0.302984	0.6555	bd	bd	0.454962	bd	bd	bd	1.79869	1.76214	20.7677	4.55366	53.8371	10.5372	0.0876088	62.7866	94.67	2.01752	nd	nd	142.512
24.1525	79.0314	2399.51	6559.3	2242.39	413.701	1059.88	0.212228	0.409037	0.176602	bd	bd	bd	bd	0.22516	3.80691	4.66648	43.1881	8.52011	62.2879	17.3877	0.184863	48.7461	140.88	0.420339	0.137163	0.101754	88.6537
24.1876	39.4939	1064.54	2810.79	1421.56	182.267	356.957	20.6724	0.386604	0.111432	0.439843	bd	bd	0.251262	0.0288776	1.33045	1.40074	8.37076	2.2549	23.3609	5.78658	bd	17.2538	64.3947	0.0170774	0.476742	65.1006	130.122
24.2228	81.3131	2130.13	3591.82	1469.69	357.263	891.157	0.270177	29.2387	bd	0.441503	bd	bd	bd	0.455147	3.49756	1.76542	23.5545	7.0947	70.0871	12.8713	0.0518654	44.2077	149.276	100.919	nd	nd	202.368
24.258	71.0221	2735.1	5273.78	1649.41	379.659	682.016	0.109863	0.425604	0.460758	bd	bd	bd	0.622542	0.152914	4.29511	3.06355	18.9616	6.95883	60.1889	10.6641	0.128022	50.3016	105.904	0.206312	0.0547021	0.0201894	123.928
24.2931	70.5164	2584.62	5530.6	1897.79	345.96	518.424	1.04927	0.504319	0.174106	1.03256	bd	bd	bd	0.144884	3.43978	3.2118	31.4519	7.74937	99.9383	14.5893	bd	41.8954	163.286	0.271115	1.18272	nd	107.715
24.3283	69.8317	1664.19	3721.1	2198.69	285.508	428.453	0.14762	0.71164	0.122839	bd	bd	0.131203	0.416167	0.156615	3.98544	2.37458	15.0533	5.46753	49.8112	11.7672	0.214594	25.4592	90.1454	1.05137	0.343079	0.101754	120.235
24.3634	78.3137	2552.69	11706.2	2336.44	407.896	510.689	0.324672	1.66695	0.179815	bd	bd	0.192058	bd	0.308877	2.57205	2.28113	22.0354	10.2418	89.6474	13.47	bd	49.633	142.92	1.50548	0.548994	0.152885	178.813
24.3986	88.0807	1700.32	5205.45	1318.59	275.121	357.429	0.272957	1.48918	0.151173	bd	bd	bd	bd	0.125801	1.06597	2.18552	18.8187	4.65908	43.4347	7.09469	0.105322	30.0375	79.2978	1.59975	0.58337	0.152885	125.883
24.4337	109.278	7164.59	8863.13	2297.56	500.94	665.421	0.35318	1.35914	0.0973153	bd	bd	bd	0.662685	0.249386	1.02372	2.04732	17.912	6.59647	81.7794	15.0007	0.0677993	46.5663	127.081	1.72142	0.827095	0.307298	244.681
24.4689	70.4949	3126.37	4225.68	2126.46	262.747	459.839	0.216671	0.345599	bd	1.09978	bd	bd	1.68512	0.0473009	2.59212	2.00495	16.6873	4.76579	50.9404	8.98366	bd	34.275	89.3688	1.48743	nd	nd	131.049
24.5041	97.6077	2431.06	8432.9	2797.69	489.73	905.659	0.61207	0.879366	0.171876	1.01933	bd	bd	2.93479	0.218081	5.79351	2.33507	37.2183	7.06449	72.6652	15.1061	0.0595751	46.5038	146.018	0.636331	2.08902	nd	209.728
24.5392	66.1153	2024.68	3348.78	1609.74	281.282	453.646	0.261146	0.758406	0.055067	0.656429	bd	0.118221	0.753727	0.23846	2.72696	1.84715	16.6802	2.89614	50.1361	7.61397	bd	26.0302	84.7419	1.4798	nd	nd	152.279
24.5744	73.1535	3448.71	4291.91	1796.93	358.593	539.368	0.513957	0.0690193	0.0718035	bd	0.522172	bd	0.982806	0.183123	0.412978	4.13565	26.5024	6.95026	67.9139	11.082	0.100551	44.3656	119.34	0.0807942	0.0569241	0.606075	86.7078
24.6095	84.0886	3942.53	9515.06	2834.36	416.082	914.262	1.61321	2.43366	0.385697	1.71415	bd	bd	1.96823	bd	4.04014	4.83015	30.4787	6.78946	68.7513	14.7712	bd	57.9808	137.776	0.724704	1.03996	2.42994	86.1427
24.6447	54.6001	1238.67	3512.29	1451.06	204.931	514.255	0.199848	0.318766	0.0566369	0.675143	bd	bd	0.775214	0.345574	1.77215	1.49608	17.818	4.72637	46.1254	9.85344	bd	18.7528	84.1626	0.703056	nd	nd	136.979
24.6798	70.4785	1458.46	4069.23	1442.39	276.202	414.936	0.424817	0.318215	0.215401	bd	bd	bd	bd	0.118423	1.44998	2.77367	16.0524	4.04841	44.0285	11.0082	bd	26.9266	80.438	0.233146	0.0874871	0.166993	99.5799
24.715	83.0267	2390.88	7683.02	2005.46	332.529	733.412	0.33179	0.966967	bd	bd	bd	bd	bd	bd	1.5714	2.06519	20.7957	4.39637	46.6377	10.3151	0.131675	63.6587	87.0801	2.71777	nd	nd	161.017
24.715	74.3093	4643.71	7265.24	2603.53	339.57	862.569	0.463461	0.662935	bd	0.57959	bd	bd	bd	bd	6.97834	3.88764	29.6026	6.19918	62.7952	15.0832	bd	46.9257	126.252	1.3339	nd	nd	87.3461
24.7501	72.6381	2849.34	8198.22	1941.62	306.928	816.784	0.709789	0.37827	bd	bd	bd	bd	5.23668	bd	2.65291	2.99531	26.3431	7.0754	54.4788	13.5396	bd	45.2335	113.41	0.496978	nd	nd	102.469
24.7853	67.8199	2581.29	8856.17	3056.92	503.458	815.17	0.83304	1.13941	0.200011	bd	bd	0.213629	bd	bd	2.75002	3.78088	20.4598	7.05915	85.5671	17.8457	bd	53.1456	139.849	0.655718	0.337363	0.35266	133.159
24.8204	60.4706	2750.85	7809.9	2743.87	384.655	521.463	0.0860797	0.348786	0.236095	1.86846	bd	bd	bd	0.199378	5.01103	3.52767	26.7247	6.06755	51.8149	11.6465	0.0544657	48.0341	107.531	0.320285	nd	nd	109.039
24.8556	83.9828	4231.15	36621.7	2580.93	415.362	717.701	1.28344	0.546137	bd	0.575479	bd	0.20832	1.32816	bd	0.912613	2.13121	18.0601	4.21359	56.9579	5.62129	bd	37.7455	91.8382	0.396817	nd	nd	194.895
24.8908	87.7649	2831.63	16254.7	2390.97	428.341	768.786	0.226156	3.16713	0.0976985	bd	bd	bd	bd	0.0752587	3.05695	3.36434	26.9314	5.21984	52.4081	13.6823	0.0680663	40.6917	108.229	4.83565	1.91977	0.196004	127.318
24.9259	110.305	4242.17	9063.97	2759.96	667.069	1160.15	0.139977	2.34414	0.255524	0.753938	0.924492	0.548572	1.74003	0.324215	6.29539	3.47149	58.2999	11.457	106.106	18.7126	0.178023	93.2938	211.373	1.90766	0.945415	0.107158	192.156
24.9611	63.7268	2143.9	5967.63	1871.32	331.285	579.169	0.175783	0.161593	0.152634	0.450356	bd	bd	bd	0.0584958	2.65349	1.73558	20.9328	6.08335	61.8439	10.0252	bd	28.233	104.273	0.194025	0.109104	0.225279	190.878
24.9962	64.3038	1579.2	5648.68	2264.18	381.294	759.145	1.11429	0.613991	bd	bd	bd	bd	3.17649	bd	3.26016	3.41603	21.5901	4.7699	66.019	6.81751	bd	48.6494	110.777	0.513839	nd	nd	111.619
25.0314	59.7637	1879.26	4078.43	2560.9	363.958	773.209	0.0758403	0.467228	bd	0.82106	bd	bd	bd	0.175661	2.90759	3.53759	27.5651	5.00125	51.2215	10.077	0.0479869	33.9413	101.85	5.74504	nd	nd	102.883
25.0665	76.5003	1752.32	2972.9	1471.35	264.807	379.13	0.341485	0.990307	0.0573337	0.68345	bd	0.123087	bd	bd	3.675	1.56564	18.2585	3.78048	50.1717	8.2856	bd	28.6806	87.9326	1.62819	nd	nd	169.137
25.1017	89.3746	2300.4	5537	4169.52	676.892	670.09	0.24087	0.827258	0.209151	0.617111	bd	bd	2.13991	bd	6.29337	3.02714	45.6954	8.16292	72.6474	16.5238	0.218935	73.195	156.384	0.724883	0.407617	0.225279	223.608
25.1368	55.4209	2522.49	11117.7	1878.92	298.04	485.956	0.13908	1.45769	bd	0.716212	bd	bd	0.409139	bd	2.97531	1.69429	15.1592	5.3646	52.2727	7.7709	0.0841367	28.7109	87.9592	9.77382	nd	nd	175.909
25.172	80.8129	2121.44	4369.33	1393	366.393	573.948	0.451308	0.281302	bd	0.373932	bd	bd	bd	bd	1.97284	2.67693	27.9344	5.52439	43.7009	9.11185	0.0882944	37.3287	92.0279	0.58125	nd	nd	136.87
25.2072	121.033	2117.54	5279.95	2634.72	481.925	870.581	0.0931461	0.180016	bd	0.501699	bd	bd	bd	0.215745	2.64693	2.38554	23.9788	6.28306	56.9204	14.8686	0.118463	30.2884	108.074	1.80223	nd	nd	202.02
25.2423	113.669	2112.18	5586.15	2415.05	577.748	1262.22	0.336523	0.536768	bd	0.565607	bd	bd	bd	0.158346	2.63567	4.72811	41.8816	9.70852	79.1182	14.3784	bd	43.496	154.048	1.48743	nd	nd	122.194
25.2775	84.9673	2321.4	5822.32	1774.53	388.869	443.653	0.156946	0.697234	0.0677999	1.62045	bd	bd	2.32694	0.172913	4.34587	3.24088	31.8858	4.13144	55.5597	11.9773	bd	44.461	116.183	1.534	nd	nd	119.989
25.3126	90.3482	3709.86	10797.3	2123.69	489.63	964.249	0.232813	0.566056	0.202154	1.1989	bd	bd	1.3766	0.166986	3.14693	4.62806	30.8566	10.1543	99.7017	15.5225	bd	76.0621	167.754	0.513171	1.14331	nd	105.796
25.3478	86.8825	3104.69	7201.28	2341.15	470.451	1416.1	0.411501	0.0834071	bd	1.03437	bd	bd	0.590887	bd	3.97998	2.75658	35.4029	8.39912	75.9324	13.7017	bd	45.4467	142.293	0.189015	nd	nd	170.664
25.3829	73.0075	2021.25	5068.29	1810.5	359.805	638.503	0.464947	0.81957	0.261775	bd	bd	bd	bd	0.107849	4.40093	3.3362	22.456	5.14942	52.5722	12.7512	bd	32.3818	102.32	0.511058	0.185408	0.150391	107.849
25.4181	114.821	3470.39	11116	2015.89	448.297	1121.68	0.392	0.753603	0.0826596	bd	bd	bd	bd	bd	3.48938	3.58245	23.7525	7.51856	71.4973	14.824	0.173918	38.1254	125.892	0.979585	0.539909	0.401548	125.137
25.4533	99.9298	3628.03	18934.6	3347.35	538.327	720.265	0.252576	1.50273	bd	0.647101	bd	bd	bd	0.0840506	1.82347	5.40935	42.3952	10.834	85.5538	16.9377	bd	70.1735	165.44	5.54823	nd	nd	99.518
25.4884	71.2844	2068.1	7649.79	1811.11	268.101	1780.6	0.0755794	2.46462	0.137968	bd	bd	bd	1.41161	0.236148	3.14836	2.11936	26.4027	5.78542	58.6768	11.6357	0.0961218	27.5661	112.094	3.71468	1.0579	0.0463843	126.501
25.5236	74.1716	2099.06	6681.8	2489.15	343.523	767.567	1.63111	0.612331	bd	2.69816	bd	bd	bd	0.0695353	4.14037	2.94741	24.1795	4.29593	54.8087	10.1438	0.126409	57.7957	105.527	0.35008	nd	nd	116.551
25.5587	86.8326	3350.06	13336.8	3996.69	565.669	1148.33	0.1116	0.215679	0.101354	bd	bd	bd	2.08437	0.258487	1.32352	4.30314	27.544	6.93617	81.5174	16.6384	bd	52.2703	141.034	0.393905	0.12602	0.0932325	131.455
25.5939	87.5332	3764.16	7121.09	4003.06	525.529	1473.72	0.391547	0.624533	bd	bd	bd	bd	14.4703	0.0854775	6.30584	3.82115	29.2906	8.14893	51.6737	16.6301	bd	48.89	131.442	1.48743	nd	nd	137.532
25.629	97.5973	6177.75	22864.2	3735.4	741.296	1029.29	0.299713	1.18041	0.782027	0.767866	bd	bd	bd	0.445439	2.63212	4.22755	28.635	9.07687	104.79	19.0582	bd	58.1587	171.895	0.325835	0.104128	0.0400005	175.349
25.6642	71.4479	2477.63	7397.79	2017.66	332.322	620.719	0.537821	0.948026	bd	bd	bd	bd	bd	0.124753	2.07651	5.33188	30.949	7.58609	66.8884	16.2259	0.0523481	48.28	130.668	1.64379	nd	nd	62.3274
25.6994	91.5919	2393.94	7986.35	6749.22	556.95	1293.26	0.0973157	0.908889	bd	bd	bd	bd	bd	0.304063	3.73092	2.65002	24.3631	9.95509	71.9784	13.5617	bd	51.0071	127.549	8.70948	nd	nd	210.168
25.7345	77.5912	2294.64	5928.83	2502.17	502.66	980.292	0.688767	0.42931	bd	0.570679	bd	bd	6.60509	0.501487	4.06206	3.82787	39.6353	6.34495	76.906	14.6793	0.134751	58.7375	154.251	0.58125	nd	nd	131.316
25.7697	100.265	5178.91	6218.6	3311.7	670.425	1476.06	0.125654	1.17356	0.575155	bd	bd	bd	0.777107	0.29104	5.65122	4.2352	43.0059	11.7123	98.7077	22.8098	0.159807	65.3361	189.065	0.457924	0.120834	0.0184985	158.298
25.8048	76.3383	3113.41	5992.68	3171.45	568.445	481.642	0.398143	0.472519	bd	1.00079	bd	bd	1.14913	0.288835	5.99484	2.81616	34.5809	8.40622	72.6178	15.731	0.117567	57.465	143.456	1.10674	nd	nd	201.851
25.84	53.5195	2671.3	5402.09	2369.35	335.326	656.484	0.236769	0.76833	0.270414	bd	bd	bd	0.918432	0.0516884	6.01464	3.14758	27.1154	6.49502	58.0392	9.757	bd	37.1849	112.814	0.550593	0.168263	0.0741381	106.535
25.8751	64.851	1122.9	3302.6	2182.01	384.623	559.353	0.611461	1.17628	0.128221	bd	bd	0.136951	bd	bd	1.99601	2.36745	28.5111	5.53598	56.1455	10.9277	bd	38.4261	107.537	0.9827	0.543279	0.40379	162.463
25.9103	72.4013	2848.81	3706.53	2111.52	485.865	773.76	0.098067	0.604159	0.179018	bd	0.647692	bd	bd	0.227143	6.35963	3.70188	34.2584	7.80356	81.99	20.1082	0.124722	46.4946	155.978	0.701784	0.19986	0.0463843	131.248
25.9454	87.8883	1672.93	5196.71	2023.97	444.187	855.63	0.481704	0.831703	0.244245	bd	0.588148	bd	bd	0.278241	2.82605	3.93808	25.7557	4.11842	61.7771	9.73817	bd	43.4264	110.578	0.537401	0.201657	0.166993	112.793
25.9806	68.707	2827.16	5952.85	2559.05	364.732	436.538	0.0856775	0.347156	bd	bd	bd	0.335771	0.529872	bd	3.56901	4.41229	35.9876	8.82952	72.0255	11.7311	0.163718	32.8995	137.854	3.77852	nd	nd	82.6627
26.0158	96.9827	3555.29	4935.04	2174.37	483.549	609.737	0.626175	1.51103	0.352549	bd	bd	bd	0.595718	0.145247	5.60741	4.02557	28.2003	7.51879	84.9558	16.0789	0.122505	22.9017	149.618	0.699627	0.25382	0.150391	120.119
26.0509	67.3313	1156.57	4640.34	1606.8	425.606	685.447	0.469298	0.994147	bd	bd	bd	bd	bd	0.200949	1.6018	3.34527	29.0822	5.3922	68.1528	17.3674	bd	29.7916	126.606	1.97545	nd	nd	127.226
26.0861	68.9155	1128.15	3371.39	1869.17	455.24	528.294	0.165856	1.15397	bd	0.424923	bd	bd	0.487907	bd	3.28635	2.59514	23.376	7.41339	68.493	10.9301	0.0499177	38.5542	118.327	6.48828	nd	nd	175.42
26.1212	84.6866	3971.3	7706.58	2549.73	464.184	641.244	0.448162	1.19236	bd	2.8247	bd	bd	2.59342	0.0727966	3.9893	3.25427	27.8886	8.43791	97.9818	15.5973	bd	55.6242	164.281	2.48105	nd	nd	142.639
26.1564	79.5017	1957.48	4115.87	2166.56	669.291	1067.96	0.737289	0.495682	bd	bd	bd	bd	0.599732	bd	3.07746	3.81697	22.5643	6.46768	76.1776	13.5927	0.123331	32.6931	127.529	0.626946	nd	nd	175.346
26.1915	67.2428	2712.87	5843.62	2123.08	417.129	574.766	1.6129	3.28448	0.396594	0.93802	1.15022	bd	0.535849	bd	3.60927	3.97132	28.4305	6.69744	64.8815	16.0793	bd	46.4515	131.587	0.96494	0.744191	0.631407	105.035
26.2267	43.868	2637.87	11728.2	2173.68	323.433	448.057	0.686259	0.801798	0.191915	0.376879	bd	bd	bd	0.048952	1.52405	1.79203	14.7976	3.7662	41.1542	10.5452	bd	22.7892	75.685	0.518601	0.345119	0.486365	180.484
26.2619	57.5911	1804.17	7063.53	1981.18	501.475	1236.27	0.438776	1.49017	bd	0.54872	bd	bd	0.630052	0.071272	1.54624	3.43376	26.2261	10.4989	51.0365	16.4276	bd	43.8953	112.348	3.16707	nd	nd	146.043
26.297	99.3906	4063.8	12110.2	3593.46	689.35	962.413	0.12774	0.246871	0.233185	bd	bd	bd	0.790005	0.192618	4.05382	4.30549	34.2364	6.39207	76.8917	15.937	0.325726	65.289	143.407	0.220151	0.0626964	0.0463843	160.11
26.3322	67.0323	3307.84	5010.37	2437.73	465.631	811.337	0.18394	0.447228	0.0794615	0.471256	bd	bd	bd	0.414118	5.67398	3.51474	29.0192	6.89587	65.9202	17.2307	0.0553606	28.5415	129.851	0.839556	2.29806	nd	132.48
26.3673	123.269	3334.73	7105.42	3129.14	660.277	1615.59	0.271897	1.482	bd	bd	bd	bd	1.6077	0.09048	5.3875	6.76523	29.6358	7.15741	87.3489	14.143	bd	38.6219	153.89	5.08285	nd	nd	97.5986
26.4025	50.0801	3155.96	5757.03	2146	307.977	548.927	0.0685703	0.567759	bd	bd	bd	bd	1.2807	bd	2.4036	3.64241	12.5616	4.98886	44.7357	9.72221	bd	36.7266	79.9713	7.72133	nd	nd	84.5531
26.4376	67.2129	1359.02	4539.76	2148.75	340.455	980.105	0.398943	0.142533	bd	bd	bd	bd	0.456116	0.170823	3.80636	4.03715	17.422	5.81276	43.0383	11.2345	0.0466653	24.2504	86.5194	0.333174	nd	nd	84.3305
26.4728	109.635	2483.2	11089.8	3619.25	757.225	1578.67	15.5926	31.859	3.11077	12.8322	0.975518	1.45144	3.68128	0.34211	6.15277	5.93341	59.4312	11.5292	122.81	24.7752	1.60185	69.95	300.477	1.0672	1.49635	2.04937	127.621
26.508	76.299	1877.31	4828.34	2352.45	415.986	479.793	0.594974	1.22758	0.286415	1.69862	bd	0.61489	0.483968	0.307762	5.07483	3.1436	30.105	5.75283	77.2841	13.3168	0.199545	61.1425	139.891	0.66459	1.75002	nd	132.328
26.5431	47.5208	1052.1	5451	1495.21	340.09	706.173	1.76442	2.71214	0.117499	2.09399	bd	bd	1.60424	0.0970582	3.32199	2.68999	24.9899	6.43852	69.1827	13.0935	0.040727	37.6966	128.106	1.13569	nd	nd	126.428
26.5783	134.14	3186.48	7582.6	2366.83	565.604	1043.34	0.512988	2.49822	0.108172	0.641527	bd	0.232229	bd	0.275875	4.96156	4.68816	50.0291	11.0117	102.86	22.2971	0.835778	53.0567	200.116	2.48147	9.42985	nd	120.645
26.6134	84.0982	2586.33	5053.2	1621.81	476.234	957.063	0.766218	0.812436	0.142614	0.420791	0.515981	0.152324	bd	0.117804	7.3968	1.81155	37.5115	8.87952	63.5217	11.7104	0.0494323	46.0389	133.76	0.570651	0.587081	1.05096	262.888
26.6486	119.615	3800.7	7609.88	3477.75	631.191	1135.59	1.14459	0.868666	0.0952804	bd	bd	0.411151	0.648828	0.666161	5.41457	7.52546	35.5354	11.0504	92.0477	19.1297	bd	147.023	174.538	0.533048	0.539909	1.01716	83.8741
26.6837	91.3005	3248.69	6501.86	2296.87	589.709	637.188	0.27485	1.16365	bd	0.928521	bd	bd	bd	bd	5.27736	3.51483	26.6274	9.61861	61.8632	11.4655	0.109078	33.7826	120.734	3.94812	nd	nd	167.777
26.7189	77.9964	2752.07	4876.8	1671.11	366.079	486.072	0.376833	1.2798	0.239974	0.471256	bd	0.170592	0.541107	0.0612104	4.80592	3.65653	36.4409	6.56474	67.1226	11.6965	0.613949	58.4962	133.428	0.903081	0.440546	0.213584	100.116
26.754	93.1486	2967.48	8660.81	4777.11	554.664	526.785	1.73249	1.95207	0.426	bd	0.614676	bd	bd	0.06511	6.03545	3.73866	18.0345	7.61753	39.7887	14.2525	bd	29.9237	94.2577	0.533907	0.271367	0.344355	148.359
26.7892	84.9073	2354.6	7268.81	3275.14	526.902	818.859	0.094613	1.08416	bd	bd	bd	bd	1.7671	bd	6.13564	3.64816	28.3691	8.46015	80.8374	12.4177	0.30172	45.1524	142.814	10.6858	nd	nd	144.43
26.8244	67.7572	2682.21	5614.1	2169.44	368.661	516.415	0.571951	0.821727	bd	bd	bd	bd	1.0937	0.0615526	1.91635	2.46718	22.6497	9.26732	58.2095	12.0468	0.111897	35.8466	109.106	1.33978	nd	nd	149.426
26.8595	107.704	1944.79	9541.88	2014.93	574.016	1091.47	1.59159	4.29501	bd	0.785754	bd	bd	bd	0.455816	3.66154	3.61799	29.3021	9.39897	65.7145	14.8885	0.185535	33.5465	133.712	2.5165	nd	nd	158.656
26.8947	61.3596	1937.77	5812.14	1747.78	282.42	842.964	2.81568	3.93109	0.854658	2.53433	bd	bd	0.722077	bd	6.41324	5.44611	19.7354	5.48824	86.3571	14.1876	bd	28.1845	148.485	0.593162	0.475775	0.648698	51.8571
26.9298	81.0492	4293.92	4621.92	2271.04	470.139	828.106	1.5587	1.03156	bd	1.54673	bd	bd	0.883577	bd	6.42548	2.96557	37.285	9.63711	75.5062	23.2698	0.0903988	56.6473	160.11	0.61716	nd	nd	158.533
26.965	101.939	4177.79	9485.88	2234.04	681.223	910.897	1.33619	2.56885	0.498641	3.6984	bd	bd	4.24658	0.205436	7.03142	5.25324	39.4038	8.57096	82.0084	16.7764	bd	48.8404	171.598	0.726098	nd	nd	129.677
27.0001	87.1589	2258.54	6011.59	2074.95	413.25	824.77	1.6597	3.76524	bd	bd	bd	bd	2.70216	0.600789	5.95525	5.05719	45.5394	8.95615	101.098	15.812	0.0686	76.106	191.146	2.11557	nd	nd	81.7154
27.0353	78.3668	1545.89	9056.15	2698.76	583.974	574.302	0.247114	0.351719	0.214572	bd	bd	0.460653	0.726947	0.177243	4.50641	4.34184	42.3106	10.244	93.9571	16.5714	bd	41.0966	174.11	0.300407	0.0970723	0.0975146	134.499
27.0705	82.4875	2550.45	8021.24	2113.3	409.029	932.406	0.187825	1.02376	0.0811397	bd	bd	bd	1.66865	0.49508	4.31454	4.81817	33.105	7.85396	53.7786	15.7104	0.0565298	46.0823	123.037	1.88209	0.747196	0.196004	84.8931
27.1056	83.6817	2536.7	6812.51	2726.02	540.039	669.191	0.595608	0.564456	bd	bd	bd	bd	bd	0.212216	4.12067	4.42223	37.5148	9.2337	67.3463	14.551	bd	59.3934	138.561	0.883759	nd	nd	122.119
27.1408	89.7662	1771.49	9095.46	2682.92	538.027	627.962	0.176947	0.341038	bd	bd	bd	bd	bd	0.194949	6.5726	4.81124	41.6049	6.76138	65.3444	11.2518	0.26841	37.7123	137.059	1.79731	nd	nd	111.827
27.1759	96.7643	4729.76	5678.4	2098.09	605.536	924.112	0.597836	0.797992	0.100374	0.59528	bd	bd	0.683513	0.255988	8.26738	6.49673	39.7827	12.1433	94.9366	17.5523	0.14056	47.1588	182.21	0.749417	3.24614	nd	93.2063
27.2111	84.3844	1579.15	4753.77	1939.74	479.557	504.53	0.172118	0.418484	0.149452	0.886344	1.08685	bd	1.52911	bd	3.13878	2.69313	18.4704	5.83295	42.1395	10.8782	0.0518024	37.6207	87.3953	0.513171	1.14331	nd	178.067
27.2462	104.225	1992.04	5345.04	3854.98	587.209	684.312	0.537647	1.03362	0.18144	1.61675	bd	bd	5.57532	0.149875	3.15426	4.3149	32.2622	7.23142	56.1791	15.1405	0.0628899	35.6826	127.377	0.769921	nd	nd	136.089
27.2814	66.262	2100.25	6013.38	1884.92	546.829	436.797	0.363996	0.431993	bd	bd	bd	bd	2.10637	0.0591252	2.1212	5.44663	28.6261	6.27701	74.5388	13.2169	bd	28.2287	133.188	1.10674	nd	nd	100.398
27.3166	72.0349	1552.48	3725.36	1997.74	436.054	588.725	0.311843	0.982357	0.132172	bd	bd	bd	0.900048	0.226228	6.85521	3.08457	24.2707	6.14535	56.2119	12.2036	0.0458129	30.5935	111.324	1.10084	0.440151	0.199775	141.366
27.3517	70.5719	2011.91	8643.73	3049.08	405.335	1282.25	0.524624	0.790687	bd	0.747029	bd	bd	3.00855	0.215598	5.38833	3.72126	26.7897	7.89501	74.7995	14.9882	0.087757	bd	138.869	1.40547	nd	nd	108.924
27.3869	126.337	2342.84	4867.53	3233.85	575.588	bd	0.892903	0.740586	0.0931532	bd	bd	0.199986	bd	0.0717574	3.59539	4.7844	52.8764	10.8037	115.897	17.288	bd	34.2597	207.243	0.548278	0.470814	0.811619	120.305
27.422	74.8818	1878.42	4324.82	2178.38	353.473	722.783	0.192034	0.369171	0.109389	bd	0.795501	bd	0.370598	0.0903589	4.48254	3.03744	19.2385	5.54008	58.3539	10.3433	0.152801	23.0102	102.923	0.552887	0.19986	0.148645	116.372
27.4572	63.1338	1358.34	3914.74	1321.06	430.455	982.365	0.494606	0.549359	0.278473	0.409807	0.502512	bd	4.26788	0.36012	4.42921	3.24138	28.1929	7.72557	66.7557	15.5391	bd	46.345	132.747	0.322022	0.148286	0.209711	132.8
27.4923	64.9629	1144.85	4551.13	1142.51	369.631	694.232	0.387289	10.3278	0.0541071	0.644987	bd	0.11616	bd	0.0416796	6.23177	3.59864	38.0864	8.93803	61.8466	12.5061	0.151916	35.0779	142.779	16.0438	nd	nd	102.714
27.5275	95.0046	1747.8	4047.22	2416.72	500.049	685.89	0.49383	2.39757	bd	bd	bd	bd	1.13485	0.0638683	2.89719	5.51444	39.9624	7.95626	82.6121	11.1676	bd	41.5227	154.2	4.5275	nd	nd	90.68
27.5626	77.2333	1574.68	3389.77	1903.68	489.233	703.136	0.0965494	0.697117	0.176248	bd	bd	bd	bd	0.223628	3.70154	4.50357	29.6334	9.29161	77.1757	16.1165	0.0610903	31.6462	141.616	0.822491	0.234236	0.0463843	108.632
27.5978	109.015	2469.3	7311.88	2403.51	643.03	2282.5	0.276864	4.71315	bd	bd	bd	bd	0.814464	0.198582	4.6163	6.46304	34.8301	11.1776	117.362	22.4107	0.0833278	109.841	202.863	15.8749	nd	nd	99.4934
27.633	117.437	2322.07	6911.24	1466.77	543.999	942.376	bd	1.62828	bd	1.05263	bd	bd	0.601322	0.303797	7.91527	5.40038	40.496	9.13665	84.4143	16.8616	0.0615212	34.3492	167.81		nd	0	100.733
27.6681	96.2251	2764.71	10204.5	2275.57	558.364	957.222	0.22542	0.887814	0.0973806	bd	bd	bd	bd	0.680845	5.53391	3.70005	29.8768	7.23271	71.4323	14.3341	bd	49.7749	134.001	1.35996	0.539909	0.196004	150.907
27.7033	84.1997	5286.59	9796.68	2068.1	548.817	763.519	0.903605	0.984059	bd	1.28667	bd	bd	2.21975	0.179211	5.73948	3.81322	35.2152	7.47684	65.5367	16.273	0.227103	58.3905	139.628	1.01556	nd	nd	143.925
27.7384	77.827	2746.43	7745.33	2469.02	533.749	932.233	0.587626	1.35878	bd	1.17608	bd	bd	bd	bd	7.04484	4.62799	33.3421	7.73967	74.3677	15.8434	bd	49.8055	146.088	2.15632	nd	nd	115.331
27.7736	58.0634	1778.42	10381.1	3775.36	459.178	1024.15	1.30738	1.05456	0.167998	bd	bd	bd	1.14401	0.138772	5.35743	2.95276	36.7044	5.92929	68.915	10.2133	0.0582309	34.3331	133.885	0.499514	0.371739	0.658936	155.508
27.8087	63.426	2495.42	13400.7	3380.38	402.114	1742.23	0.612945	1.08045	bd	0.507857	bd	bd	2.35002	bd	5.8018	4.24536	44.6054	7.7175	72.3358	12.4518	0.119917	32.034	151.709	1.64379	nd	nd	94.7184
27.8439	89.3241	3986.57	10265.5	3264.06	491.833	1071.82	0.693712	0.658795	bd	bd	bd	bd	bd	0.285085	5.01179	5.51133	33.163	5.18717	75.4451	18.0428	0.057732	55.4343	143.999	0.885596	nd	nd	89.2403
27.8791	77.3469	3261.09	7368.02	4021.43	613.976	bd	0.528273	1.01559	bd	3.17712	bd	bd	bd	0.147262	7.62624	4.16053	29.9744	8.51117	78.5127	13.926	0.0617933	52.409	147.579	1.79278	nd	nd	147.571
27.9142	84.4862	1908.3	27784.3	1890.85	449.611	1217.41	0.571307	1.32105	bd	0.568864	bd	bd	1.3129	0.0738886	5.10046	4.58503	30.1765	6.16456	54.3616	14.5469	bd	37.3116	118.783	2.15632	nd	nd	98.0605
27.9494	74.3785	1844.27	12335.7	1958.36	507.254	823.47	0.315207	0.605962	0.0893296	0.52978	1.30575	bd	2.45147	0.227821	5.0764	5.1451	26.7103	6.56014	84.9427	10.8359	bd	37.5647	144.796	0.847359	2.76974	nd	98.5898
27.9845	31.8019	1259.01	3008.99	1369.51	288.145	478.822	0.730208	1.30326	0.130829	0.516409	0.633229	0.186937	1.78181	0.0719269	2.93507	2.30228	14.1337	3.65133	33.9676	7.421	0.0606649	22.7394	69.7656	0.97598	1.36884	1.9586	125.156
28.0197	86.3915	2232.69	9024.1	2418.19	644.933	651.495	0.542377	2.63327	0.275009	bd	bd	bd	1.24641	0.636672	7.50044	7.67898	41.4097	8.73841	76.9223	19.0146	0.191598	61.4934	166.598	1.51114	0.567047	0.166993	83.9868
28.0548	70.8005	1650.23	13527.8	3068.01	810.873	738.879	0.899342	1.92333	0.167392	3.98083	bd	0.359366	1.13988	0.434017	8.37768	6.05825	40.7857	11.0475	92.6633	21.9264	bd	60.7336	189.763	1.15097	nd	nd	133.846
28.09	48.782	1201.66	8375.83	1559.18	367.206	313.195	0.573961	3.27425	1.3488	1.42813	bd	0.102574	0.982586	0.121853	7.9433	4.36962	21.1682	4.6643	51.7143	9.80581	bd	32.4017	107.498	0.518941	0.169655	0.0452381	84.0361
28.1252	107.922	4481.7	10892.1	2014.81	566.559	535.721	0.294596	0.95598	0.167812	0.495138	bd	bd	bd	0.287229	7.48361	5.92447	30.8153	10.9364	79.8108	15.6435	0.0581661	43.2962	152.815	0.933274	0.587081	0.343401	95.6304
28.1603	86.1064	1270.94	5768.13	1758.19	530.272	469.287	0.600388	0.570168	0.144152	0.425329	0.521546	bd	0.488372	0.182904	6.69052	5.53644	28.9812	6.04475	72.547	13.5662	0.150895	30.858	136.299	0.455273	0.407617	0.814719	95.7785
28.1955	59.1096	1594.76	6021.67	1614.78	385.008	492.889	0.333159	0.640485	bd	bd	bd	bd	bd	0.179167	6.81049	2.4192	22.6464	3.92886	40.5257	9.65079	bd	30.5088	87.1342	1.79276	nd	nd	159.147
28.2306	93.0122	3451.43	8321.51	3200.46	628.206	926.49	0.802236	2.10134	0.38619	1.14233	2.1046	bd	1.31165	0.244396	8.58975	4.83631	45.8146	10.5546	86.2779	17.4419	0.134195	34.9144	181.608	0.843716	0.56179	0.407687	129.894
28.2658	96.3107	3017.13	13232.2	2642.66	728.469	757.495	1.42323	2.45972	bd	1.41229	bd	bd	bd	0.302153	8.89265	7.87977	47.8762	11.1711	104.275	22.411	0.165909	54.0336	208.104	1.61167	nd	nd	92.448
28.3009	79.8134	2237.05	4757.26	1582.55	445.276	743.805	1.38605	1.22845	0.0822301	1.96533	bd	bd	1.12552	0.209715	5.87168	5.02892	34.191	7.4795	65.3083	17.2438	0.461754	20.0199	141.12	0.670014	nd	nd	88.5431
28.3361	90.169	5961.38	6503.31	2242.19	726.941	823.398	0.815913	1.43822	0.113989	0.676026	bd	bd	0.776228	0.493614	10.2176	6.56541	53.1638	11.8885	138.359	24.4121	bd	58.917	248.92	1.06052	5.15172	nd	110.723
28.3712	106.897	2608.82	8882.16	2833.61	644.229	1170.68	0.48507	1.52805	0.102285	0.606614	bd	0.219591	3.5105	0.260862	10.6633	5.34467	47.3064	12.6308	96.7442	14.5989	0.143236	192.597	194.001	1.60516	6.0998	nd	120.537
28.4064	111.767	1786.07	9561.11	2104.37	569.37	614.289	0.190767	1.61576	0.165645	0.98238	bd	bd	3.95638	0.136829	6.18565	3.35182	26.887	5.02175	57.119	11.7623	bd	25.9645	117.375	1.78765	3.98278	nd	169.869
28.4416	60.6517	1709.99	6018.22	1511.72	457.934	677.353	0.719553	1.08447	0.259575	1.02459	bd	bd	bd	0.524442	5.82341	4.26117	47.7836	7.17273	56.9681	9.96601	0.120364	31.661	135.588	0.580737	0.574092	0.972752	107.467
28.4767	62.6938	2378.22	5439.27	2162.05	501.887	1169.93	0.447731	0.750589	0.285123	bd	bd	bd	1.29225	0.156754	2.9541	3.83992	30.0663	6.22531	60.1861	14.2338	bd	47.9318	120.438	0.445778	0.155899	0.132963	130.702
28.5119	47.6748	1180.72	9441.78	2927.64	398.414	3210.35	0.53142	0.590249	0.2992	0.440309	0.539914	bd	bd	0.123268	5.57262	3.21769	19.311	6.81441	60.4641	11.7897	0.103967	25.008	109.694	0.322022	0.148286	0.209711	123.82
28.547	59.8856	3108.78	7132.26	1607.37	406.703	864.477	0.444641	0.493863	bd	bd	bd	bd	bd	0.269	3.98177	2.91394	26.0712	5.33902	48.7075	11.5285	bd	21.0666	99.7495	1.03577	nd	nd	139.572
28.5822	66.1139	1529.75	6202.94	2386.93	558.736	689.502	0.798922	0.954378	0.0833485	bd	bd	bd	1.71408	0.138386	5.95153	3.61231	42.4439	9.52739	66.6141	13.3846	0.0580687	38.5387	145.223	0.78967	0.6781	0.811619	154.676
28.6173	110.341	3853.33	15974.6	4470.99	1106.93	812.016	0.804635	1.28718	0.453026	bd	bd	bd	bd	0.785948	9.66565	8.57779	59.4314	13.6937	90.4124	19.1563	bd	53.4605	204.268	0.463799	0.168263	0.150391	129.046
28.6525	66.1292	2533.63	6226.3	2069.19	663.485	541.04	0.39211	0.560874	0.166192	bd	bd	bd	bd	0.13728	6.81023	4.61473	32.1263	8.27884	61.4877	11.5062	bd	34.296	126.08	0.49986	0.19986	0.199775	143.775
28.6877	97.6368	4770.85	10424.7	3836.98	850.64	1324.12	0.130144	1.76575	0.356952	bd	bd	0.766322	bd	1.24612	4.13013	7.01861	40.4051	10.5535	103.431	14.8647	bd	35.8174	184.668	1.07247	0.292948	0.0308717	121.198
28.7228	91.7283	1599.73	7542.03	2828.78	658.226	856.498	0.854825	0.930936	bd	bd	bd	bd	bd	0.442176	6.91818	5.60794	42.0591	8.26535	66.6443	18.2211	bd	48.3847	149.944	1.01556	nd	nd	117.374
28.758	66.3016	2140.49	3920.85	1949.25	374.553	538.962	0.413386	0.875705	bd	bd	bd	bd	0.949985	bd	6.47485	2.45197	13.1882	5.61805	54.0692	7.55181	0.0483547	26.7594	91.5932	1.97545	nd	nd	152.756
28.7931	76.1676	1544.02	6390.82	1985.05	570.422	688.872	1.12973	4.95737	0.171681	2.55303	bd	bd	0.581637	0.293852	5.47487	4.61548	34.8487	6.62919	67.8365	11.5809	bd	35.232	140.673	2.56034	nd	nd	123.589
28.8283	130.978	2581.4	13926.9	4966.83	862.586	1195.3	1.12008	3.79653	0.472579	9.35466	bd	0.335946	1.0656	0.399085	9.46427	7.06117	65.065	11.4917	76.0305	19.5399	0.219133	51.8123	205.197	1.18786	nd	nd	122.159
28.8634	117.462	2375.88	8262.92	3096.62	754.289	1390.17	0.399947	4.33426	0.113345	bd	bd	0.243334	1.5514	0.490824	1.89421	9.96144	52.8633	13.7125	112.935	17.5948	0.078967	64.3728	216.094	4.77673	2.26456	0.298776	75.7209
28.8986	91.7293	2226.21	5233.44	1714.43	450.034	729.549	0.691917	0.573886	0.0721851	bd	bd	bd	0.491557	bd	3.31094	3.06473	37.3219	8.91384	95.6503	15.9109	0.151879	32.135	166.002	0.548278	0.470814	0.811619	146.843
28.9338	65.7747	1600.22	8506.94	2022.46	617.115	1025.84	0.829094	1.23653	0.154317	bd	1.68613	bd	0.52281	0.400116	6.3236	3.73837	37.5999	10.2487	91.2493	13.2203	bd	58.5035	167.209	0.802663	0.474527	0.454921	165.076
28.9689	100.818	4424.32	9094.64	3197.77	652.788	1152.42	0.967833	1.45867	0.232375	bd	bd	0.248196	1.5824	0.0890558	16.6901	9.43951	65.6232	17.5549	120.451	24.3468	0.324596	65.3941	258.684	0.722532	0.371739	0.35266	69.1549
29.0041	91.9224	2642.78	6191.49	2854.53	1024.65	1169.17	0.814085	0.774307	0.34227	1.01242	bd	bd	2.33074	0.36778	6.06449	6.0268	53.1683	14.9511	121.556	21.6026	0.0591708	47.8942	229.011	0.334058	0.233573	0.466796	170.016
29.0392	106.077	1666.5	7643.57	2538.54	963.295	789.382	0.633554	1.52884	bd	1.05511	1.2938	0.381945	1.21151	0.146959	7.29038	7.06908	52.6538	10.8561	123.995	18.8768	bd	49.5074	226.993	2.25032	nd	nd	136.269
29.0744	130.476	7267.89	9102.13	3798.37	1201.95	1790.07	1.52031	3.25133	0.282971	3.36474	bd	bd	1.92694	0.484338	11.5956	11.9972	83.7476	13.0392	148.102	28.3896	bd	58.8786	307.702	1.15097	nd	nd	100.186
29.1095	69.6684	4216.89	7959.29	2095.33	541.568	560.853	0.0994545	0.508364	bd	0.535677	0.656856	0.193912	3.09998	0.631507	9.4163	5.20237	35.4473	9.34564	69.9081	15.4728	0.126486	29.2342	150.518	4.76667	nd	nd	104.1
29.1447	109.868	3342.88	6371.49	2731.74	689.173	892.219	0.1591	0.644657	bd	11.2259	1.05079	bd	0.983955	0.497109	7.68335	9.61023	73.0179	10.1298	124.982	19.333	bd	39.565	259.317	3.77852	-0.0235903	-0.00624325	71.7125
29.1798	42.3276	946.368	3455.52	1242.83	392.186	605.188	0.128491	0.958763	bd	0.994166	0.403663	bd	0.759756	0.0921607	2.74877	3.39465	25.672	5.23382	54.7451	8.7649	bd	20.4466	103.896	6.95831	nd	nd	115.531
29.215	87.3276	2136.62	10644.5	3524.23	703.769	1099.58	0.423547	0.814238	0.241267	bd	bd	0.257693	1.64295	0.199294	6.38267	6.59226	26.0789	8.61544	112.322	20.1329	bd	71.6156	183.703	0.552887	0.19986	0.148645	106.757
29.2502	95.5542	3267.51	8294.64	2315.24	643.595	979.914	1.95608	2.75963	bd	0.565973	bd	bd	1.30622	0.243385	6.46572	3.88144	45.9971	7.1677	87.8528	13.5355	0.200792	37.3958	171.732	1.31561	nd	nd	165.813
29.2853	85.1099	1869.24	6732.89	2767.91	bd	1247.77	0.376731	1.18677	0.0794401	bd	bd	0.170546	2.72644	0.484709	6.54314	3.65554	25.9178	6.36394	60.2783	11.6933	bd	41.8806	119.477	1.60516	0.884703	0.401548	#VALUE!
29.3205	47.2556	2409.98	8671.93	1817.03	380.517	549.928	0.216183	0.701524	0.123145	0.363346	bd	0.131529	0.417202	0.265304	4.82239	5.16635	28.5741	3.93744	45.251	11.6987	0.128905	32.2993	101.668	0.933274	0.587081	0.343401	73.6531
29.3556	92.043	3015.65	5169.33	3828.06	652.366	919.806	0.78153	3.02633	0.376222	bd	bd	bd	1.27779	0.155	6.325	5.79258	37.0008	9.58133	97.7374	16.4919	0.0650404	53.2338	178.546	1.2473	0.47637	0.175892	112.621
29.3908	70.7295	1661.87	7978.16	3491.65	848.993	1171.49	1.10647	1.05367	0.412914	0.607652	bd	bd	0.69772	0.625168	3.58027	4.98908	41.8038	13.5063	124.883	14.5323	0.0713837	77.077	207.799	0.359657	0.19181	0.316393	170.17
29.4259	75.4228	1945.09	3905.88	2192.38	702.068	914.305	0.539174	1.38898	0.303566	bd	bd	bd	0.51295	0.326192	9.77653	7.29154	37.1844	9.80439	80.3873	10.6165	bd	32.4972	158.132	0.746887	0.270965	0.150391	96.2853
29.4611	107.48	1777.13	8041.84	2602.83	590.55	1085.45	0.806556	0.570792	0.169131	0.499032	bd	bd	bd	0.289488	8.15731	6.2706	34.3312	9.82925	71.9305	12.6107	0.0586236	33.889	145.465	0.361513	0.347796	0.93284	94.1775
29.4963	69.7066	3873.44	7631.86	2660.21	665.587	1303.09	0.299346	0.477469	bd	bd	bd	bd	4.07275	0.140853	7.91421	5.18819	31.9702	7.36216	63.0879	13.3199	bd	32.8052	133.833	1.48743	nd	nd	128.289
29.5314	42.7101	1388.33	4024.21	1572.53	461.729	780.309	0.58931	1.2054	0.0614804	0.364617	bd	bd	0.84151	0.266233	3.9408	3.48623	23.8881	4.61765	39.8152	6.79886	0.0428333	28.3213	85.8754	1.35212	8.00538	nd	132.444
29.5666	58.6931	3031.7	11795.5	2658.93	556.111	793.681	1.05435	0.540739	0.401761	0.472757	1.1652	bd	0.54283	0.274246	8.59862	5.23066	26.9396	9.112	76.2031	15.2214	0.0555369	35.1668	145.757	0.191299	0.0959891	0.287159	106.318
29.6017	91.2102	2387.85	10863.2	2219.26	865.108	895.287	0.416082	0.799887	bd	1.40564	0.857524	bd	0.80298	0.30073	7.98914	7.10728	52.2427	12.0038	130.011	17.3571	bd	49.7897	231.294	1.79273	nd	nd	121.721
29.6369	70.4913	2191.55	8014.75	1412.01	422.396	668.303	0.2957	0.568471	0.0623532	1.11677	bd	0.133863	1.71116	0.546938	4.90796	4.03583	35.6365	7.17953	65.28	13.0756	bd	20.5383	134.551	0.979585	nd	nd	104.662
29.672	117.737	3885.74	5886.37	2866.64	880.528	1801.14	0.854756	1.9233	0.240025	bd	bd	bd	0.813181	0.517113	14.1899	8.26085	42.6794	9.16848	97.8571	21.3091	bd	51.5179	197.813	0.996597	0.474527	0.30153	106.591
29.7072	85.6384	4426.9	10604.3	1440.32	553.106	1109.62	1.20227	0.511598	0.458128	1.62803	0.661034	0.195145	0.618988	0.0700204	8.812	4.10171	19.3947	8.04021	77.2435	15.0837	0.127291	41.0388	138.021	0.158721	0.1356	0.701119	134.848
29.7117	39.1833	2119.58	3678.62	1415.32	375.843	635.165	0.312602	0.360121	0.0516124	bd	bd	bd	bd	0.132069	6.18973	3.10849	25.7282	6.35319	42.2511	7.2483	0.0359582	24.1393	91.7354	0.651095	0.413205	0.512842	120.909
29.7468	84.1371	1473.76	5483.61	2733.36	661.732	803.12	0.878359	0.738543	0.182274	2.16738	bd	0.179634	1.81719	0.312757	10.8754	7.40016	39.9094	9.64952	78.8203	15.7312	bd	43.9744	168.662	0.431549	nd	nd	89.4213
29.782	116.418	5030.55	10756.2	2769.1	917.65	845.962	1.01057	0.832272	0.480702	0.707409	bd	0.753559	2.39024	0.728818	19.5258	12.3911	70.6055	16.7717	119.956	19.9457	bd	49.975	266.1	0.267356	0.130142	0.24822	74.0572
29.8171	93.4075	2510.05	9457.4	6734.82	831.684	1433.72	1.05499	0.675348	bd	2.31333	bd	bd	3.93008	1.19356	11.2542	8.67483	58.8021	10.7835	125.724	19.1238	bd	47.1016	243.529	0.596959	nd	nd	95.8732
29.8523	104.834	2868.18	7641.61	3136.83	854.591	972.93	0.572223	1.42974	bd	1.12622	bd	bd	2.543	0.49318	10.2949	6.69993	45.2581	10.8414	73.5211	16.8951	bd	30.7032	169.675	2.33	nd	nd	127.552
29.8874	69.4766	1932.42	8277.37	3274.11	692.654	1376.11	1.35473	4.40986	bd	1.02582	bd	0.357059	1.13257	0.0670233	4.35608	8.2493	49.5997	7.86554	69.14	11.9315	bd	30.9244	159.489	3.03553	nd	nd	83.9651
29.9226	52.3368	2532.4	5068.62	2080.55	478.732	640.414	0.704664	0.828241	0.0646498	bd	bd	bd	0.850856	0.222969	3.98115	3.9508	25.1809	7.74206	61.4204	11.6189	0.0450414	38.2491	116.566	0.805239	0.758684	0.922912	121.173
29.9578	66.0431	3548.9	7355.3	1811.97	669.003	536.142	0.740878	0.712192	0.136624	0.403118	bd	0.576802	1.36208	0.294924	7.16085	5.36549	31.7664	7.79991	84.8545	14.583	bd	56.6123	155.757	0.519378	0.537205	1.06076	124.686
29.9929	107.117	2585.75	6564.58	2615.42	940.549	1366.21	1.30351	1.44626	0.16643	bd	0.602149	bd	0.520259	0.43223	10.8376	9.48653	51.2684	10.3306	108.81	18.3566	0.115952	51.4589	213.56	0.688561	0.514618	0.663175	99.1457
30.0281	80.6631	4462.02	5990.2	2251.71	556.699	1147.89	0.656029	1.53319	0.390262	0.923044	bd	bd	2.61679	0.267057	7.59173	5.49122	44.3285	10.1129	88.052	13.6395	0.0539474	47.234	175.602	0.652145	0.353022	0.260984	101.38
30.0632	83.6388	2438.37	7478.32	2676.24	673.145	646.554	0.767365	2.74239	0.273534	1.62223	bd	bd	1.19205	0.795255	7.55977	9.24739	32.1043	10.9223	83.3043	18.1385	0.190571	60.5026	168.669	1.38672	4.09361	nd	72.7929
30.0984	79.0174	1901.04	10161.7	2162.74	505.36	1089.15	1.04281	1.31158	0.333853	0.392849	0.968253	bd	1.32738	0.287412	6.73642	4.63842	33.5367	5.99919	73.984	12.851	0.0461498	31.8173	143.41	0.518898	0.280182	0.341786	108.951
30.1335	94.9551	3834.57	6316.06	2780.74	937.913	1042.93	0.883767	2.67276	0.104314	2.49314	bd	bd	0.655427	0.452605	13.2723	6.56082	51.5926	11.4483	80.6478	16.0462	bd	37.6656	186.83	1.92553	nd	nd	142.957
30.1687	68.8679	2592.04	6240.65	2507.79	844.496	892.388	0.546272	2.52037	0.818046	2.15564	1.31836	0.178661	0.566701	0.711631	12.1313	8.00301	61.8183	12.4564	95.263	19.6727	bd	33.1867	218.161	0.623979	0.294226	0.114576	105.522
30.2039	95.4722	4067.61	9758.33	3237.63	768.867	900.816	2.14522	1.62819	bd	3.89749	bd	0.184652	1.22683	0.901425	12.8787	8.5209	50.4612	10.619	99.8729	20.3325	0.0649442	63.4986	212.669	0.707779	nd	nd	90.2331
30.239	110.369	2204.52	9063.62	2197.72	853.91	1326.69	1.17473	3.16254	0.0969768	0.575133	bd	0.1921	2.61028	0.420772	9.86216	7.56849	51.3623	7.00357	82.8179	19.9399	bd	47.6926	186.787	1.89476	13.3155	nd	112.824
30.2742	74.7165	2724.51	4516.26	3048.17	729.87	891.964	1.62854	2.19188	0.18015	bd	0.651788	0.17754	4.25564	0.54763	14.3442	7.87287	43.9793	9.16358	97.387	14.1067	0.12551	38.6305	196.487	0.874351	0.720533	0.765436	92.7071
30.3093	73.7478	1512.04	4319.67	2938.21	953.593	802.408	0.113464	1.53898	bd	0.559949	0.686619	bd	1.24262	0.409664	14.0793	7.20021	44.125	12.8033	76.3361	20.3409	0.198655	54.7219	179.436	12.6486	nd	nd	132.44
30.3445	53.6493	1682.65	2772.43	1932.22	410.712	522.91	0.711809	1.61714	0.107354	bd	0.388411	0.45323	0.335588	0.278806	6.01507	3.97776	31.6149	8.4456	48.8529	10.0758	0.0372107	17.4796	112.874	1.32934	0.892072	0.561421	103.252
30.3796	79.5736	2075.58	5008.33	3098.13	658.657	878.455	1.51901	1.00394	0.157513	0.934148	bd	bd	1.03136	1.17558	9.68434	6.39486	50.6596	12.3261	85.1495	12.4041	0.0545964	44.3395	182.44	0.437667	2.60245	nd	102.998
30.4148	70.8032	2205.71	5010.37	1901.79	647.155	1196.17	0.651145	1.7899	0.154482	0.455807	0.558919	bd	3.12068	0.538005	8.9364	5.79251	39.8101	8.62685	74.5731	13.5379	bd	37.754	158.546	1.32546	1.19405	0.824513	111.723
30.4499	76.0482	1395.8	6476.97	1884.45	726.548	843.151	1.04547	2.19213	0.236908	1.8749	bd	0.155393	1.57197	0.758588	18.5649	9.89674	61.4031	11.8156	67.39	13.8881	bd	42.5396	190.794	1.03343	nd	nd	73.4129
30.4851	64.772	1267.75	5403.91	1994.53	485.416	510.633	1.10825	1.1275	0.162491	bd	1.57686	bd	1.44824	0.37664	12.3402	6.06841	32.6875	6.84728	78.596	9.47747	bd	40.5458	151.817	0.601528	0.410922	0.577507	79.9907
30.5203	74.2964	1947.09	5209.71	2063.26	748.017	433.154	0.949133	4.14333	0.182077	0.357559	0.438445	bd	bd	0.529358	5.47049	3.84576	35.9225	10.4388	54.8409	10.9971	bd	27.0924	128.115	2.31932	1.87978	0.709014	194.504
30.5554	84.3365	2743.85	8261.08	2237.64	844.277	802.362	0.59137	1.328	0.0814732	0.483187	bd	0.691368	1.07227	0.49781	9.4732	7.08395	41.8838	10.844	97.9979	15.8061	0.0567622	42.3116	187.835	1.35775	6.6554	nd	119.182
30.5906	84.0929	3396.13	7500.67	1902.08	959.296	1087.6	0.190583	2.66511	0.556248	0.467929	1.73282	bd	0.49575	0.762979	15.7955	9.39158	58.3784	10.9628	95.7019	19.3945	0.0549697	52.1157	216.496	1.04408	0.322896	0.0346065	102.144
30.6257	73.1723	1204.24	5073.12	1479.14	523.758	661.063	0.65555	2.99525	0.136038	1.21219	bd	0.28082	2.74809	0.71412	16.2643	7.93529	40.8533	9.51631	89.2817	15.3062	0.190026	31.8486	187.899	2.34505	nd	nd	66.0037
30.6609	102.256	1971.42	5993.47	1808.02	641.256	639.425	1.33451	1.88183	bd	1.31543	bd	bd	1.47175	0.644857	6.93241	7.30196	50.6229	9.83678	76.8306	12.8057	0.10285	25.5933	170.979	1.315	nd	nd	87.8197
30.696	77.9849	1604.53	12926.4	1487.34	692.082	981.854	1.20295	2.44903	bd	1.74566	bd	bd	3.57639	0.149444	13.8213	5.91061	60.4978	10.7942	98.8981	18.3205	0.0817842	30.6315	217.366	1.8985	nd	nd	117.092
30.7312	96.0256	3278.03	9806.3	1850.93	930.307	675.59	0.728862	1.00177	bd	0.510209	bd	bd	1.13224	0.373273	11.2602	5.94736	55.9502	10.3024	79.1244	15.692	bd	33.5781	182.023	1.2817	nd	nd	156.424
30.7664	135.548	4156.73	8628.54	2518.67	788.221	1293.89	2.00049	2.40349	0.311674	0.61206	bd	bd	7.73951	0.538731	15.7666	9.34165	57.8745	10.8955	105.877	23.3399	bd	34.603	236.701	0.694458	0.637021	0.873008	84.3771
30.8015	75.2378	1496.19	3475.92	1821.54	766.532	765.458	1.58428	1.79127	0.464568	1.37759	bd	bd	2.07029	0.401505	14.555	7.57904	51.2189	10.879	75.0193	13.7545	bd	27.5078	180.695	0.489407	0.398835	0.67148	101.138
30.8367	101.974	1871.58	8961.26	2381.82	677.52	1163.43	1.41573	2.33314	0.16782	0.995276	bd	bd	3.96437	0.435838	11.5352	8.89606	49.096	12.9242	75.5233	20.2994	0.11692	50.8346	187.586	1.04784	5.67658	nd	76.1596
30.8718	71.2922	2643.97	14423.6	1552.28	689.691	578.514	2.47278	1.91995	0.1578	0.935852	bd	0.155514	3.18772	0.619434	14.2827	7.73593	48.0008	10.1221	101.975	13.2681	0.054696	50.639	204.834	0.578675	4.96789	nd	89.1542
30.907	97.8474	1760.94	6314.73	1858.7	623.419	1125.53	1.89817	2.68985	0.165789	0.48917	bd	0.163387	2.22013	0.357881	13.502	7.09808	51.3923	13.5241	70.8568	14.3814	0.057465	29.2625	178.739	0.983354	1.67203	2.23964	87.8292
30.9421	92.4854	2681.86	11815.8	3333.28	1077.64	1918.29	1.02351	4.43111	0.105669	1.89258	bd	0.438442	2.84424	0.458486	14.213	9.09346	54.7344	14.6821	141.529	24.8411	0.147975	50.6946	270.287	2.87056	nd	nd	118.507
30.9773	87.9168	3054.16	9095.61	4299.33	894.885	3932.41	1.06721	3.07767	1.06515	1.05022	0.640694	0.36555	1.1595	0.22544	10.5658	10.9576	63.4725	16.6513	105.529	18.9016	0.185368	47.7254	234.729	0.545594	0.199466	0.104676	81.668
31.0125	57.165	1537.81	5845.7	1722.83	580.259	1221.24	1.25151	1.4614	0.445796	bd	bd	bd	5.02739	0.385281	14.5062	9.70591	50.0124	8.53113	73.8518	13.7918	bd	17.644	178.971	0.453288	0.194135	0.237708	59.7841
31.0476	85.8855	2084.39	11591.4	3102.5	881.236	1230.71	1.99624	3.61173	0.292685	1.7358	bd	bd	3.93515	0.420506	25.0567	11.7945	67.9336	13.3849	110.697	19.0619	bd	39.8824	259.92	1.06975	5.03854	nd	74.716
31.0828	83.1378	2291.95	5310.74	1774.35	929.251	1202.74	2.10289	1.53616	0.0694399	2.4874	0.504983	0.137552	0.436307	0.794487	16.9409	8.69853	54.624	11.4437	74.0465	12.1074	bd	40.5247	185.93	0.602846	nd	nd	106.828
31.1179	48.8671	1593.51	6328.38	1682.9	831.822	494.473	1.42043	2.66636	0.055833	0.999995	bd	0.110599	0.734818	0.341145	15.4531	10.1786	52.1821	6.36029	58.6893	9.23686	0.0388987	42.0742	158.429	1.51593	nd	nd	81.7229
31.1531	94.3924	2951.88	22632.4	2915.23	1375.53	bd	4.31457	4.62115	0.512754	1.82216	bd	0.201529	bd	0.71217	25.5599	14.2855	84.3885	25.0007	149.638	27.3704	0.142468	77.8916	338.427	0.680449	1.09435	2.24804	96.2885
31.1882	95.1793	3251.19	7402.95	2742.45	1012.47	803.674	2.8658	5.51072	0.458566	bd	bd	bd	4.94591	1.44508	19.5411	11.2351	77.2401	12.9451	144.87	20.3328	0.191435	37.0251	301.39	1.10017	0.71167	0.529163	90.117
31.2234	81.4243	2338.01	6615.68	3358.05	889.613	941.636	2.43361	2.5269	0.242689	0.476587	0.584399	0.681926	1.05762	0.491011	21.0701	13.2175	74.169	14.3165	119.417	16.6669	bd	53.2186	267.352	0.695314	0.860105	1.36391	67.3055
31.2585	80.5959	3741.99	7141.7	3095.94	694.377	913.881	12.0437	1.3477	0.343049	1.62679	1.49486	0.134829	5.10441	0.537044	15.3621	9.79977	50.3615	11.4445	84.9706	15.6366	0.095316	35.6218	210.207	0.0938303	0.735384	33.5923	70.8565
31.2937	68.7956	2112.02	5484.05	2097.28	684.596	803.485	1.29163	2.09163	0.1695	0.669051	0.40816	0.232877	1.12469	0.44284	11.0311	6.13039	40.6545	8.17289	57.0118	10.4878	0.0391028	20.6842	139.919	0.995717	1.69567	2.67406	111.672
